# Supplementary material for: Maternal Exposure to Non-nutritive Sweeteners Impacts Progeny’s Metabolism and Microbiome
Source: Front Microbiol. 2019 Jun 20;10:1360. doi: 10.3389/fmicb.2019.01360 (PMC6595049; doi:10.3389/fmicb.2019.01360)
Supplement: Supplementary file 3 [file Table_3.XLSX]

## Sheet: Sheet1
	PLASMA - Heat map of statistically significant biochemicals
		“biochemical name*” Indicates a compound that has not been confirmed based on a standard, but we are confident in its identity.
		“biochemical name**” Indicates a compound for which a standard is not available, but we are reasonably confident in its identity or the information provided.
		“biochemical name (#) or biochemical name [#]” indicates a compound that is a structural isomer of another compound in the Metabolon spectral library; for example, a steroid that may be sulfated at one of several positions that are indistinguishable by the mass spectrometry data or a diacylglycerol for which more than one stereospecific molecule exists.
		GROUP	ANOVA								Fold of Change					Statistical Values
		p<=0,05	p<=0,05 & Fold change >=1	p<=0,05 & Fold change <=1							ANOVA Main Effect	ANOVA Contrasts				ANOVA Main Effect		ANOVA Contrasts							Mean Values				% Filled Values
		0,05<p<0,1	0,05<p<0,1 & Fold change >=1	0,05<p<0,1 & Fold change <=1							Group	Chow Diet ADI-1x	Chow Diet ADI-2x	Chow Diet ADI-2x		Group		Chow Diet ADI-1x		Chow Diet ADI-2x		Chow Diet ADI-2x			Control Diet	Chow Diet ADI-1x	Chow Diet ADI-2x		Control Diet	Chow Diet ADI-1x	Chow Diet ADI-2x		Super Pathway	Sub Pathway	Chemical ID	CAS	RI	Mass
																		Control Diet		Control Diet		Chow Diet ADI-1x
	Pathway Sort Order	Super Pathway	Sub Pathway	Biochemical Name	Platform	Comp ID	KEGG	HMDB	PUBCHEM	X		Control Diet	Control Diet	Chow Diet ADI-1x	X	p-value	q-value	p-value	q-value	p-value	q-value	p-value	q-value	X				X				X
	1	Amino Acid	Glycine, Serine and Threonine Metabolism	glycine	LC/MS pos early	58	C00037	HMDB00123	750			1.03	0.9	0.88		0.332	0.2263	0.9041	0.5846	0.2237	0.3794	0.1843	0.3355		1.0399	1.068	0.9394		100	100	100		Amino Acid	Glycine, Serine and Threonine Metabolism	340	56-40-6	1375	76.0393
	2			N-acetylglycine	LC/MS polar	27710		HMDB00532	10972			0.71	0.8	1.12		0.004	0.0287	0.0013	0.0227	0.0182	0.1237	0.2093	0.3564		1.2663	0.9035	1.0076		100	100	100		Amino Acid	Glycine, Serine and Threonine Metabolism	100001006	543-24-8	1780	116.035
	4			sarcosine	LC/MS pos early	1516	C00213	HMDB00271	1088			0.54	0.58	1.06		0.0155	0.0611	0.0081	0.0653	0.0164	0.1161	0.7346	0.5889		1.5437	0.8395	0.8928		100	83	100		Amino Acid	Glycine, Serine and Threonine Metabolism	1023	107-97-1	1280	90.055
	5			dimethylglycine	LC/MS pos early	5086	C01026	HMDB00092	673			1.01	1.04	1.03		0.7174	0.3455	0.8243	0.5655	0.4365	0.4996	0.5748	0.5236		0.9992	1.013	1.0429		100	100	100		Amino Acid	Glycine, Serine and Threonine Metabolism	806	1118-68-9	1104	104.071
	6			betaine	LC/MS pos early	3141	C00719	HMDB00043	247			0.87	0.93	1.08		0.3593	0.2352	0.1606	0.2632	0.4126	0.4829	0.536	0.5094		1.1238	0.9723	1.0499		100	100	100		Amino Acid	Glycine, Serine and Threonine Metabolism	799	107-43-7	1064	118.086
	9			serine	LC/MS pos early	1648	C00065	HMDB00187	5951			0.94	0.87	0.92		0.1326	0.1466	0.3514	0.3923	0.0483	0.189	0.2534	0.3892		1.0767	1.0168	0.9368		100	100	100		Amino Acid	Glycine, Serine and Threonine Metabolism	503	56-45-1	1239	106.05
	10			N-acetylserine	LC/MS polar	37076		HMDB02931	65249			1.07	1.02	0.96		0.6618	0.3308	0.379	0.4047	0.7601	0.6386	0.5604	0.5185		0.9735	1.0386	0.9922		100	100	100		Amino Acid	Glycine, Serine and Threonine Metabolism	100001851	97-14-3	2000	146.046
	16			threonine	LC/MS pos early	1284	C00188	HMDB00167	6288			0.92	0.81	0.88		0.0356	0.0798	0.2869	0.3474	0.0116	0.0949	0.0972	0.2565		1.0917	1.0083	0.8827		100	100	100		Amino Acid	Glycine, Serine and Threonine Metabolism	564	72-19-5	1514	120.066
	17			N-acetylthreonine	LC/MS neg	33939			152204			1.12	1	0.89		0.5833	0.3107	0.3669	0.3967	0.9762	0.6945	0.3823	0.4554		0.992	1.1155	0.9916		100	100	100		Amino Acid	Glycine, Serine and Threonine Metabolism	100001274	17093-74-2	821.6	160.062
	28		Alanine and Aspartate Metabolism	alanine	LC/MS pos early	1126	C00041	HMDB00161	5950			0.98	0.79	0.8		0.093	0.1197	0.8436	0.5712	0.0492	0.1905	0.0715	0.2413		1.1369	1.1198	0.8969		100	100	100		Amino Acid	Alanine and Aspartate Metabolism	811	56-41-7	1700	90.055
	30			N-acetylalanine	LC/MS polar	1585	C02847	HMDB00766	88064			1.04	0.97	0.94		0.6998	0.3406	0.5945	0.4964	0.7686	0.6387	0.4122	0.4636		1.0095	1.0492	0.9822		100	100	100		Amino Acid	Alanine and Aspartate Metabolism	1110	97-69-8	1564.8	130.051
	34			aspartate	LC/MS pos early	443	C00049	HMDB00191	5960			1.19	0.65	0.55		0.2478	0.1926	0.6405	0.5042	0.241	0.3888	0.1102	0.2727		1.3722	1.6271	0.8887		100	100	100		Amino Acid	Alanine and Aspartate Metabolism	234	56-84-8	1165	134.045
	35			N-acetylaspartate (NAA)	LC/MS polar	22185	C01042	HMDB00812	65065			0.9	0.87	0.97		0.8147	0.3689	0.6072	0.4976	0.5663	0.5645	0.9518	0.6504		1.0003	0.9039	0.8733		83	67	67		Amino Acid	Alanine and Aspartate Metabolism	100000787	997-55-7;997-55-7	3143	174.041
	38			asparagine	LC/MS pos early	512	C00152	HMDB00168	6267			0.99	0.9	0.9		0.2153	0.1757	0.8731	0.5805	0.1149	0.2836	0.1515	0.3088		1.0104	1.0027	0.9061		100	100	100		Amino Acid	Alanine and Aspartate Metabolism	917	70-47-3	1225	133.061
	39			N-acetylasparagine	LC/MS pos early	33942		HMDB06028	99715			1.06	0.82	0.78		0.3218	0.2205	0.7366	0.5323	0.2678	0.4069	0.1561	0.3094		1.1181	1.1809	0.9189		100	100	100		Amino Acid	Alanine and Aspartate Metabolism	100001257	4033-40-3	785	175.071
	40			hydroxyasparagine**	LC/MS pos early	62060						1.14	1.13	0.99		0.4881	0.2862	0.2975	0.3557	0.3125	0.4379	0.9732	0.6532		0.9332	1.0603	1.0541		100	100	100		Amino Acid	Alanine and Aspartate Metabolism	100020205		1149	149.056
	41		Glutamate Metabolism	glutamate	LC/MS pos early	57	C00025	HMDB00148	611			1.58	0.78	0.49		0.1656	0.1562	0.1671	0.2632	0.6344	0.6015	0.0718	0.2413		1.1577	1.8241	0.9		100	100	100		Amino Acid	Glutamate Metabolism	561	56-86-0	1500	148.06
	42			glutamine	LC/MS pos early	53	C00064	HMDB00641	5961			1.07	1.05	0.98		0.6662	0.3312	0.3973	0.4135	0.5108	0.5448	0.8458	0.6219		0.9407	1.0107	0.9897		100	100	100		Amino Acid	Glutamate Metabolism	563	56-85-9	1291	147.076
	44			N-acetylglutamate	LC/MS polar	15720	C00624	HMDB01138	70914			0.79	0.42	0.53		0.0267	0.0744	0.5865	0.4931	0.0115	0.0949	0.0348	0.1943		1.5105	1.1993	0.6331		100	100	100		Amino Acid	Glutamate Metabolism	100000282	5817-08-03	3106	188.056
	45			N-acetylglutamine	LC/MS polar	33943	C02716	HMDB06029	182230			1	0.89	0.89		0.3838	0.2447	0.8868	0.5819	0.2645	0.4062	0.2119	0.3572		1.0592	1.0631	0.9445		100	100	100		Amino Acid	Glutamate Metabolism	100001253	2490-97-3	2140	187.072
	51			pyroglutamine*	LC/MS pos early	46225			134508			0.77	0.87	1.13		0.1035	0.127	0.0363	0.1217	0.237	0.3884	0.3026	0.4162		1.1635	0.8955	1.0119		100	100	100		Amino Acid	Glutamate Metabolism	100001540	2353-44-8	1900	129.066
	52			N-acetyl-aspartyl-glutamate (NAAG)	LC/MS pos early	35665	C12270	HMDB01067	5255			9.73	1.72	0.18		0.069	0.1012	0.0358	0.1212	0.812	0.6446	0.0568	0.2247		0.9391	9.1373	1.6161		100	100	83		Amino Acid	Glutamate Metabolism	100001612	3106-85-2	1035	305.098
	53			beta-citrylglutamate	LC/MS neg	54923	C20775		72715786			2.29	1.49	0.65		0.441	0.2662	0.3092	0.367	0.2452	0.3911	0.8773	0.6343		0.976	2.2391	1.4507		100	100	100		Amino Acid	Glutamate Metabolism	100003271	73590-26-8	530	320.062
	59			S-1-pyrroline-5-carboxylate	LC/MS pos early	42370	C04322	HMDB01301	1196			0.65	0.53	0.81		0.7976	0.3657	0.9446	0.5911	0.5452	0.5555	0.5916	0.5288		2.0803	1.358	1.102		83	100	100		Amino Acid	Glutamate Metabolism	35	2906-39-0	1528	114.055
	64		Histidine Metabolism	histidine	LC/MS neg	59	C00135	HMDB00177	6274			1.05	1.05	1.01		0.7214	0.3456	0.5489	0.4768	0.4508	0.5094	0.8741	0.6343		0.9423	0.9853	0.9928		100	100	100		Amino Acid	Histidine Metabolism	355	5934-29-2	755.9	154.062
	65			1-methylhistidine	LC/MS pos early	30460	C01152	HMDB00001	92105			0.86	0.83	0.97		0.1625	0.1562	0.1331	0.2451	0.0788	0.227	0.7698	0.5972		1.1433	0.9858	0.953		100	100	100		Amino Acid	Histidine Metabolism	100001051	332-80-9	2755	170.092
	66			3-methylhistidine	LC/MS neg	15677	C01152	HMDB00479	64969			0.89	0.93	1.05		0.5038	0.2873	0.2496	0.3307	0.5377	0.554	0.5791	0.5236		1.112	0.9858	1.0355		100	100	100		Amino Acid	Histidine Metabolism	100000042	368-16-1	906.3	168.078
	67			N-acetylhistidine	LC/MS neg	33946	C02997	HMDB32055	75619			0.84	0.88	1.05		0.4619	0.2738	0.2216	0.3128	0.5522	0.5558	0.5149	0.5025		1.1491	0.9647	1.0137		100	83	100		Amino Acid	Histidine Metabolism	100001293	39145-52-3	900	196.073
	71			trans-urocanate	LC/MS pos early	607	C00785	HMDB00301	736715			0.76	1.25	1.65		0.2612	0.1982	0.3437	0.3915	0.4761	0.5251	0.1081	0.2708		1.0276	0.7782	1.286		100	100	100		Amino Acid	Histidine Metabolism	537	104-98-3	2285	139.05
	73			imidazole propionate	LC/MS pos early	40730		HMDB02271	70630			1.05	3.74	3.56		0.0049	0.0321	0.2728	0.3455	0.0168	0.1161	0.0016	0.1155		0.4998	0.5244	1.8691		83	33	100		Amino Acid	Histidine Metabolism	100003434	1074-59-5	2263	141.066
	74			formiminoglutamate	LC/MS pos early	43493	C00439	HMDB00854	439233			1.02	0.25	0.25		0.5115	0.2879	0.7327	0.5318	0.2664	0.4062	0.4326	0.4672		1.9314	1.9605	0.4853		67	50	67		Amino Acid	Histidine Metabolism	100002500	816-90-0	1880	175.071
	75			imidazole lactate	LC/MS pos early	15716	C05568	HMDB02320	440129			1.31	1.18	0.91		0.5452	0.3012	0.2856	0.3474	0.4818	0.5286	0.7048	0.577		0.9306	1.2163	1.1009		100	83	100		Amino Acid	Histidine Metabolism	100000263	14403-45-3	2040	157.061
	76			carnosine	LC/MS pos early	1768	C00386	HMDB00033	439224			2.64	0.77	0.29		0.1973	0.1675	0.1805	0.277	0.6871	0.6195	0.0895	0.2508		1.3505	3.5609	1.0407		100	100	100		Amino Acid	Histidine Metabolism	249	305-84-0	2942	227.114
	79			anserine	LC/MS pos early	15747	C01262	HMDB00194	112072			3	0.23	0.08		0.2465	0.1923	0.396	0.4133	0.3923	0.4718	0.0997	0.258		4.3043	12.9325	0.9986		100	100	100		Amino Acid	Histidine Metabolism	100000044	10030-52-1	2924	241.13
	80			histamine	LC/MS pos early	1574	C00388	HMDB00870	774			0.84	0.71	0.84		0.1505	0.1555	0.3723	0.4013	0.056	0.1992	0.2674	0.3998		1.1883	1.0031	0.8454		100	100	100		Amino Acid	Histidine Metabolism	354	51-45-6	3035	112.087
	81			1-methylhistamine	LC/MS pos early	43831	C05127	HMDB00898	3614			1.04	0.83	0.8		0.255	0.1965	0.9863	0.6037	0.1568	0.3301	0.1523	0.3088		1.146	1.1874	0.9545		100	100	100		Amino Acid	Histidine Metabolism	100001204	501-75-7	3040	126.103
	82			1-methyl-4-imidazoleacetate	LC/MS pos early	32350	C05828	HMDB02820	75810			0.99	1.06	1.08		0.8433	0.3777	0.8814	0.5815	0.6838	0.6178	0.5791	0.5236		1.002	0.9872	1.0671		100	100	100		Amino Acid	Histidine Metabolism	100001208	2625-49-2	2064	141.066
	83			1-ribosyl-imidazoleacetate*	LC/MS pos early	61868	C05131	HMDB02331	5117448			1.01	1.03	1.02		0.9879	0.4146	0.8999	0.5846	0.8894	0.6726	0.9894	0.6601		0.9457	0.9581	0.9738		100	100	100		Amino Acid	Histidine Metabolism	100001668	29605-99-0	2006	259.092
	84			4-imidazoleacetate	LC/MS pos early	32349	C02835	HMDB02024	96215			0.96	1.17	1.22		0.3649	0.2369	0.7451	0.5342	0.2998	0.4273	0.1804	0.33		1.0235	0.9799	1.2002		100	100	100		Amino Acid	Histidine Metabolism	100001207	645-65-8	2055	127.05
	90		Lysine Metabolism	lysine	LC/MS pos early	1301	C00047	HMDB00182	5962			1.04	0.98	0.95		0.8108	0.3689	0.6524	0.5071	0.8665	0.6648	0.5378	0.5094		1.0185	1.0573	1.0029		100	100	100		Amino Acid	Lysine Metabolism	407	56-87-1	2850	147.113
	92			N6-acetyllysine	LC/MS polar	36752	C02727	HMDB00206	92832			0.93	0.86	0.92		0.3672	0.2374	0.5138	0.4642	0.1643	0.3417	0.4399	0.4689		1.1107	1.0352	0.9557		100	100	100		Amino Acid	Lysine Metabolism	100001734	692-04-6	2612.6	187.109
	97			N6,N6,N6-trimethyllysine	LC/MS pos early	1498	C03793	HMDB01325	440120			1.18	1.01	0.86		0.8148	0.3689	0.5421	0.4743	0.8656	0.6648	0.658	0.5566		1.0211	1.2023	1.034		100	100	100		Amino Acid	Lysine Metabolism	189	23284-33-5	2825	189.16
	98			5-hydroxylysine	LC/MS pos early	15685	C16741	HMDB00450	1029			1.26	0.92	0.74		0.0781	0.1088	0.1055	0.2198	0.5161	0.5448	0.0306	0.1893		1.0435	1.3117	0.9652		100	100	100		Amino Acid	Lysine Metabolism	100000054	13204-98-3	2790	163.108
	99			5-(galactosylhydroxy)-L-lysine	LC/MS pos early	43582						1.76	1.09	0.62		0.0514	0.0872	0.0224	0.0944	0.6281	0.6015	0.0582	0.2247		0.8988	1.5855	0.9781		100	100	100		Amino Acid	Lysine Metabolism	100002462	32448-36-5	2755	325.161
	101			2-aminoadipate	LC/MS polar	6146	C00956	HMDB00510	469			1.04	0.57	0.55		0.0153	0.0611	0.456	0.4456	0.0278	0.1447	0.0059	0.1474		1.2471	1.302	0.7145		100	100	100		Amino Acid	Lysine Metabolism	381	542-32-5;1118-90-7	3500	160.062
	103			2-oxoadipate	LC/MS polar	38347	C00322	HMDB00225	71			0.79	0.46	0.58		0.1375	0.1486	0.9757	0.6009	0.0824	0.231	0.0872	0.2508		1.7855	1.4154	0.8181		100	100	100		Amino Acid	Lysine Metabolism	92	3184-35-8	2633.1	159.03
	109			pipecolate	LC/MS pos early	1444	C00408	HMDB00070	849			0.83	0.84	1.01		0.2454	0.192	0.1499	0.2574	0.1475	0.3236	0.9923	0.6601		1.2091	1.0044	1.0099		100	100	100		Amino Acid	Lysine Metabolism	1025	4043-87-2	2200	130.086
	110			6-oxopiperidine-2-carboxylate	LC/MS neg	43231		HMDB61705	3014237			1.16	0.71	0.61		0.0009	0.0111	0.1455	0.2533	0.0064	0.0893	0.0003	0.0996		1.0435	1.2136	0.7371		100	100	100		Amino Acid	Lysine Metabolism	100004499	34622-39-4	965	142.051
	114			N-trimethyl 5-aminovalerate	LC/MS pos early	57687						0.97	0.87	0.91		0.5583	0.3039	0.6977	0.5229	0.2939	0.4246	0.4996	0.4982		1.1096	1.072	0.9706		100	100	100		Amino Acid	Lysine Metabolism	100015962		2186	160.133
	115		Phenylalanine Metabolism	phenylalanine	LC/MS pos early	64	C00079	HMDB00159	6140			0.77	0.85	1.1		0.0039	0.0287	0.0012	0.0227	0.0188	0.1239	0.1948	0.3443		1.2477	0.9596	1.0592		100	100	100		Amino Acid	Phenylalanine Metabolism	460	63-91-2	2878	166.086
	116			N-acetylphenylalanine	LC/MS neg	33950	C03519	HMDB00512	74839			0.74	0.84	1.14		0.0058	0.0342	0.0016	0.0259	0.0409	0.1785	0.1323	0.2973		1.1538	0.8536	0.9736		100	100	100		Amino Acid	Phenylalanine Metabolism	100001256	2018-61-3	2597	206.082
	119			phenylpyruvate	LC/MS neg	566	C00166	HMDB00205	997			0.68	0.78	1.15		0.4343	0.2647	0.2168	0.308	0.3716	0.4604	0.7177	0.5826		0.9371	0.6343	0.7305		100	50	50		Amino Acid	Phenylalanine Metabolism	241	156-06-9	2515	163.04
	120			phenyllactate (PLA)	LC/MS neg	22130	C05607	HMDB00779	3848			0.72	0.9	1.24		0.0668	0.1008	0.0231	0.0952	0.3492	0.4506	0.1389	0.2995		1.1264	0.8112	1.0083		100	100	100		Amino Acid	Phenylalanine Metabolism	100000774	828-01-3	2208	165.056
	131		Tyrosine Metabolism	tyrosine	LC/MS pos early	1299	C00082	HMDB00158	6057			0.91	0.98	1.07		0.849	0.3788	0.5742	0.4905	0.7578	0.6386	0.7981	0.6072		1.0968	0.9969	1.0699		100	100	100		Amino Acid	Tyrosine Metabolism	815	60-18-4	2430	182.081
	132			N-acetyltyrosine	LC/MS neg	32390		HMDB00866	68310			0.97	0.85	0.88		0.4214	0.2607	0.8963	0.5846	0.2366	0.3884	0.2886	0.4119		1.0958	1.0588	0.928		100	100	100		Amino Acid	Tyrosine Metabolism	100001104	537-55-3	1680	222.077
	139			4-hydroxyphenylpyruvate	LC/MS neg	1669	C01179	HMDB00707	979			0.7	0.69	0.99		0.152	0.1559	0.1394	0.2488	0.0692	0.2134	0.6973	0.5738		1.5592	1.0874	1.0782		100	100	100		Amino Acid	Tyrosine Metabolism	1141	156-39-8	1690	179.035
	142			3-(4-hydroxyphenyl)lactate	LC/MS neg	32197	C03672	HMDB00755	9378			1.03	0.99	0.96		0.7883	0.3635	0.6628	0.5108	0.8134	0.6446	0.5037	0.4982		1.0295	1.0626	1.0192		100	100	100		Amino Acid	Tyrosine Metabolism	240	6482-98-0	1379	181.051
	146			phenol sulfate	LC/MS neg	32553	C02180	HMDB60015	74426			0.04	0.32	7.78		0.0007	0.0111	0.0002	0.0071	0.0077	0.0949	0.0892	0.2508		5.4703	0.2255	1.7552		100	100	100		Amino Acid	Tyrosine Metabolism	100001510	937-34-8	2156	172.991
	147			phenol glucuronide	LC/MS neg	52747		HMDB60014	87235			0.36	0.59	1.64		0.0098	0.0474	0.0034	0.0444	0.0249	0.1377	0.343	0.4324		1.0078	0.3655	0.5996		100	0	33		Amino Acid	Tyrosine Metabolism	100006679	17685-05-1	1800	269.067
	176			2-hydroxyphenylacetate	LC/MS polar	1432	C05852	HMDB00669	11970			0.82	1.01	1.24		0.273	0.2018	0.1618	0.2632	0.9786	0.6945	0.1692	0.3215		1.1532	0.9449	1.1681		100	100	100		Amino Acid	Tyrosine Metabolism	235	614-75-5	858.6	151.04
	177			homovanillate sulfate	LC/MS neg	38349		HMDB11719	29981063			1.52	1.86	1.22		0.0692	0.1012	0.1438	0.2516	0.0239	0.1342	0.3478	0.4356		0.5893	0.8965	1.0949		67	100	100		Amino Acid	Tyrosine Metabolism	100002250	38339-06-9	1047	261.007
	181			p-cresol-glucuronide*	LC/MS neg	48841		HMDB11686	154035			1.22	0.29	0.24		0.0228	0.0727	0.6236	0.5042	0.0103	0.0949	0.0281	0.1893		1.1249	1.3769	0.3317		100	83	50		Amino Acid	Tyrosine Metabolism	100006191	17680-99-8	2420	283.082
	183			N-formylphenylalanine	LC/MS neg	48433			759256			0.76	0.57	0.74		0.651	0.3284	0.7174	0.5268	0.3655	0.4597	0.5809	0.5241		1.0599	0.8075	0.5999		67	67	67		Amino Acid	Tyrosine Metabolism	100006056	13200-85-6	2360	192.067
	199			thyroxine	LC/MS neg	2761	C01829	HMDB01918	5819			1.27	1.2	0.95		0.6182	0.3198	0.3734	0.4014	0.4385	0.4996	0.9049	0.638		0.7288	0.9233	0.8729		100	67	83		Amino Acid	Tyrosine Metabolism	1094	51-48-9	4808	775.679
	203		Tryptophan Metabolism	tryptophan	LC/MS pos early	54	C00078	HMDB00929	6305			0.82	0.79	0.96		0.1206	0.1385	0.1282	0.2418	0.0514	0.1955	0.6198	0.5438		1.1449	0.9353	0.9021		100	100	100		Amino Acid	Tryptophan Metabolism	565	73-22-3	2986	205.097
	204			N-acetyltryptophan	LC/MS neg	33959	C03137	HMDB13713	700653			0.71	0.63	0.88		0.0105	0.0501	0.0275	0.1047	0.0036	0.0603	0.3333	0.4253		1.2921	0.9184	0.8092		100	100	100		Amino Acid	Tryptophan Metabolism	100001254	1218-34-4	2630	245.093
	210			C-glycosyltryptophan	LC/MS neg	48782			10981970			1.46	1.15	0.79		0.0176	0.0671	0.0054	0.0536	0.2208	0.3794	0.0675	0.231		0.8471	1.2339	0.9711		100	100	100		Amino Acid	Tryptophan Metabolism	100006379	180509-18-6	1777	365.135
	214			kynurenine	LC/MS pos early	15140	C00328	HMDB00684	161166			0.71	0.71	1.01		0.011	0.0505	0.0073	0.0601	0.0092	0.0949	0.9109	0.638		1.2645	0.8964	0.9017		100	100	100		Amino Acid	Tryptophan Metabolism	100000265	2922-83-0	2739	209.092
	216			N-acetylkynurenine (2)	LC/MS neg	48757						0.7	1.01	1.44		0.1609	0.1562	0.0759	0.1964	0.7392	0.6368	0.1379	0.2995		1.0567	0.7426	1.0723		100	67	67		Amino Acid	Tryptophan Metabolism	100006378		2378	249.088
	218			kynurenate	LC/MS neg	1417	C01717	HMDB00715	3845			0.8	0.51	0.64		0.0059	0.0342	0.2265	0.3146	0.0019	0.0367	0.0242	0.1893		1.4903	1.1877	0.755		100	100	100		Amino Acid	Tryptophan Metabolism	98	492-27-3	2224	188.035
	220			N-formylanthranilic acid	LC/MS polar	43549	C05653	HMDB04089	101399			1.09	1.06	0.97		0.8755	0.3851	0.6883	0.5194	0.9444	0.6908	0.6382	0.5481		1.0058	1.095	1.0642		100	100	100		Amino Acid	Tryptophan Metabolism	100004561	3342-77-6	900	164.035
	224			xanthurenate	LC/MS neg	15679	C02470	HMDB00881	5699			0.66	0.39	0.59		0.0401	0.0834	0.2418	0.3264	0.0128	0.0996	0.1291	0.2917		2.0129	1.3256	0.7807		100	100	100		Amino Acid	Tryptophan Metabolism	100000015	59-007	1476	204.03
	226			picolinate	LC/MS pos early	1512	C10164	HMDB02243	1018			0.71	0.78	1.09		0.0271	0.0744	0.0111	0.0734	0.0388	0.1777	0.5388	0.5094		1.2986	0.9232	1.009		100	100	100		Amino Acid	Tryptophan Metabolism	1022	98-98-6	910	124.039
	227			serotonin	LC/MS pos early	2342	C00780	HMDB00259	5202			0.72	1	1.38		0.0465	0.0867	0.0302	0.1089	0.9855	0.695	0.0313	0.1893		1.0378	0.7504	1.0333		100	100	100		Amino Acid	Tryptophan Metabolism	504	153-98-0	2550	177.102
	230			5-hydroxyindoleacetate	LC/MS pos early	437	C05635	HMDB00763	1826			1.04	0.65	0.63		0.5039	0.2873	0.9778	0.6009	0.3097	0.4357	0.3225	0.4242		1.0426	1.0832	0.678		67	50	83		Amino Acid	Tryptophan Metabolism	71	54-16-0	1893	192.066
	234			indolelactate	LC/MS pos early	18349	C02043	HMDB00671	92904			0.8	0.97	1.21		0.043	0.0841	0.0218	0.0941	0.7654	0.6387	0.0395	0.2015		1.1025	0.8815	1.0703		100	100	100		Amino Acid	Tryptophan Metabolism	100000463	832-97-3	2600	206.081
	235			indoleacetate	LC/MS pos early	27513	C00954	HMDB00197	802			0.81	0.76	0.94		0.3863	0.2452	0.336	0.3876	0.1878	0.3576	0.7048	0.577		1.302	1.0494	0.9911		100	100	100		Amino Acid	Tryptophan Metabolism	100001034	6505-45-9	2850	176.071
	237			indolepropionate	LC/MS pos early	32405		HMDB02302	3744			0.22	1.25	5.78		0.0078	0.0411	0.0358	0.1212	0.1975	0.3641	0.0023	0.1155		0.9521	0.2058	1.1901		67	67	100		Amino Acid	Tryptophan Metabolism	100001083	830-96-6	3205	190.086
	242			indole-3-carboxylic acid	LC/MS neg	38116	C19837	HMDB03320	69867			0.8	0.7	0.87		0.0394	0.0834	0.1026	0.2185	0.013	0.0996	0.2973	0.4119		1.1923	0.959	0.8326		100	100	100		Amino Acid	Tryptophan Metabolism	100002185	771-50-6	1710	160.04
	244			indoleacetylglycine	LC/MS neg	54730			446640			1.15	0.92	0.8		0.6628	0.3308	0.6436	0.5042	0.6611	0.6114	0.3724	0.4493		1.0702	1.2262	0.9844		100	100	100		Amino Acid	Tryptophan Metabolism	100006730		2610	231.078
	247			3-indoxyl sulfate	LC/MS neg	27672		HMDB00682	10258			0.87	0.79	0.92		0.0568	0.0907	0.1352	0.2473	0.0191	0.1239	0.3121	0.4198		1.0905	0.9448	0.8653		100	100	100		Amino Acid	Tryptophan Metabolism	100000467	2642-37-7	2222.2	212.002
	250		Leucine, Isoleucine and Valine Metabolism	leucine	LC/MS pos early	60	C00123	HMDB00687	6106			0.83	0.82	0.98		0.0473	0.0869	0.0428	0.1326	0.0239	0.1342	0.7685	0.5972		1.1224	0.937	0.919		100	100	100		Amino Acid	Leucine, Isoleucine and Valine Metabolism	397	61-90-5	2864	132.102
	251			N-acetylleucine	LC/MS neg	1587	C02710	HMDB11756	70912			0.97	0.81	0.84		0.1635	0.1562	0.8766	0.5805	0.0877	0.2362	0.1159	0.2815		1.0712	1.0388	0.8704		100	100	100		Amino Acid	Leucine, Isoleucine and Valine Metabolism	1082	1188-21-2	2400	172.098
	253			4-methyl-2-oxopentanoate	LC/MS neg	22116	C00233	HMDB00695	70			1.13	1	0.88		0.6836	0.3385	0.535	0.4719	0.8331	0.6521	0.409	0.4636		0.9345	1.0591	0.932		100	100	100		Amino Acid	Leucine, Isoleucine and Valine Metabolism	100000551	816-66-0	2170	129.056
	256			alpha-hydroxyisocaproate	LC/MS neg	22132	C03264	HMDB00746	83697			0.87	0.91	1.05		0.9195	0.3967	0.8769	0.5805	0.8062	0.6446	0.6895	0.5709		1.0177	0.8825	0.9242		67	67	100		Amino Acid	Leucine, Isoleucine and Valine Metabolism	100000706	10303-64-7	1840	131.071
	260			isovalerylglycine	LC/MS neg	35107		HMDB00678	546304			0.76	0.76	1		0.2574	0.1966	0.1671	0.2632	0.1462	0.3226	0.9371	0.643		1.2925	0.9853	0.9832		100	100	100		Amino Acid	Leucine, Isoleucine and Valine Metabolism	100001452	16284-60-9	1950	158.082
	267			3-methylcrotonylglycine	LC/MS pos early	31940		HMDB00459	169485			0.88	0.82	0.93		0.4609	0.2738	0.4569	0.4456	0.2238	0.3794	0.6208	0.5438		1.1269	0.9916	0.9266		100	100	100		Amino Acid	Leucine, Isoleucine and Valine Metabolism	100001149	33008-07-0	1980	158.081
	268			beta-hydroxyisovalerate	LC/MS neg	12129		HMDB00754	69362			1.12	0.86	0.77		0.5381	0.2986	0.6314	0.5042	0.5296	0.5504	0.2749	0.4049		0.8537	0.9541	0.7379		83	83	67		Amino Acid	Leucine, Isoleucine and Valine Metabolism	1442	625-08-1	1027	117.056
	284			isoleucine	LC/MS pos early	1125	C00407	HMDB00172	6306			0.88	0.87	0.99		0.0893	0.1185	0.0738	0.1956	0.045	0.189	0.7941	0.6053		1.1019	0.9705	0.9562		100	100	100		Amino Acid	Leucine, Isoleucine and Valine Metabolism	376	73-32-5	2800	132.102
	286			N-acetylisoleucine	LC/MS neg	33967		HMDB61684	2802421			0.95	0.84	0.88		0.1616	0.1562	0.5962	0.4964	0.068	0.2134	0.1746	0.3285		1.0744	1.0259	0.9008		100	100	100		Amino Acid	Leucine, Isoleucine and Valine Metabolism	100001276	3077-46-1	2325	172.098
	287			3-methyl-2-oxovalerate	LC/MS neg	15676	C00671	HMDB03736	47			1.13	1.04	0.92		0.6872	0.3396	0.5031	0.459	0.8983	0.6744	0.4272	0.4672		0.9829	1.1128	1.026		100	100	100		Amino Acid	Leucine, Isoleucine and Valine Metabolism	100000036	1460-34-0;51829-07-3	2064.2	129.056
	288			alpha-hydroxyisovalerate	LC/MS neg	33937		HMDB00407	99823			0.76	0.77	1.01		0.5488	0.3019	0.2873	0.3474	0.4906	0.5312	0.6972	0.5738		1.3967	1.0597	1.0724		100	100	100		Amino Acid	Leucine, Isoleucine and Valine Metabolism	100001300	600-37-3	1126	117.056
	291			2-methylbutyrylglycine	LC/MS neg	31928		HMDB00339	193872			0.52	0.48	0.92		0.0182	0.0674	0.0141	0.0801	0.0119	0.095	0.934	0.643		1.8201	0.9551	0.8784		100	100	100		Amino Acid	Leucine, Isoleucine and Valine Metabolism	100001155	52320-67-9	1884	158.082
	293			tigloylglycine	LC/MS pos early	1598		HMDB00959	6441567			0.66	0.85	1.3		0.108	0.1294	0.0382	0.1268	0.3207	0.4404	0.2319	0.3707		1.3116	0.8592	1.1142		100	100	100		Amino Acid	Leucine, Isoleucine and Valine Metabolism	1161	35842-45-6	1926	158.081
	295			3-hydroxy-2-ethylpropionate	LC/MS neg	32397		HMDB00396	188979			0.78	0.75	0.95		0.1944	0.1669	0.1322	0.2451	0.1069	0.2686	0.9035	0.638		1.1791	0.9253	0.8805		100	100	100		Amino Acid	Leucine, Isoleucine and Valine Metabolism	100001170	4374-62-3	975	117.056
	297			ethylmalonate	LC/MS polar	15765		HMDB00622	11756			0.98	0.9	0.92		0.5954	0.3149	0.8968	0.5846	0.3542	0.4506	0.4228	0.4672		1.0298	1.0053	0.9281		100	100	100		Amino Acid	Leucine, Isoleucine and Valine Metabolism	2054	601-75-2	2785	131.035
	298			methylsuccinate	LC/MS polar	15745		HMDB01844	10349			0.66	0.41	0.62		0.0351	0.0798	0.2621	0.3378	0.0113	0.0949	0.1055	0.2663		2.0283	1.3382	0.8309		100	100	100		Amino Acid	Leucine, Isoleucine and Valine Metabolism	2051	498-21-5	2800	131.035
	304			valine	LC/MS pos early	1649	C00183	HMDB00883	6287			0.87	0.84	0.96		0.0351	0.0798	0.0465	0.1404	0.0146	0.1082	0.5642	0.5185		1.1318	0.9872	0.9507		100	100	100		Amino Acid	Leucine, Isoleucine and Valine Metabolism	566	72-18-4	2479	118.086
	305			N-acetylvaline	LC/MS neg	1591		HMDB11757	66789			1.06	0.97	0.91		0.5373	0.2986	0.4818	0.4542	0.6937	0.6209	0.2791	0.4049		1.0053	1.0645	0.9718		100	100	100		Amino Acid	Leucine, Isoleucine and Valine Metabolism	1084	96-81-1	1704	158.082
	307			3-methyl-2-oxobutyrate	LC/MS polar	44526	C00141	HMDB00019	49			1.2	1.26	1.05		0.6942	0.3402	0.502	0.459	0.4374	0.4996	0.914	0.638		0.9293	1.1138	1.171		100	100	100		Amino Acid	Leucine, Isoleucine and Valine Metabolism	100000936	3715-29-5	911	115.04
	308			2-hydroxy-3-methylvalerate	LC/MS neg	36746		HMDB00317	164623			0.7	0.79	1.12		0.583	0.3107	0.346	0.3923	0.9006	0.6744	0.4109	0.4636		1.615	1.136	1.2743		100	100	100		Amino Acid	Leucine, Isoleucine and Valine Metabolism	100001541	488-15-3	1800	131.071
	310			isobutyrylcarnitine (C4)	LC/MS pos early	33441		HMDB00736	168379			0.55	0.37	0.69		0.1329	0.1466	0.2858	0.3474	0.0481	0.189	0.3127	0.4198		2.2373	1.2211	0.8375		100	100	100		Amino Acid	Leucine, Isoleucine and Valine Metabolism	100001055	25518-49-4	2810	232.154
	311			isobutyrylglycine	LC/MS neg	35437		HMDB00730	10855600			0.58	0.46	0.8		0.0421	0.0839	0.101	0.2185	0.0141	0.1063	0.3195	0.4242		1.5728	0.9093	0.7313		100	100	83		Amino Acid	Leucine, Isoleucine and Valine Metabolism	100001590	15926-18-8	1420	144.067
	316		Methionine, Cysteine, SAM and Taurine Metabolism	methionine	LC/MS pos early	1302	C00073	HMDB00696	6137			0.97	0.88	0.91		0.2085	0.1736	0.6181	0.5042	0.0903	0.2416	0.2128	0.3572		1.0387	1.0044	0.9141		100	100	100		Amino Acid	Methionine, Cysteine, SAM and Taurine Metabolism	415	63-68-3	2526	150.058
	317			N-acetylmethionine	LC/MS neg	1589	C02712	HMDB11745	448580			1.06	0.84	0.79		0.1498	0.1555	0.4562	0.4456	0.2161	0.3794	0.0576	0.2247		1.0897	1.1513	0.9131		100	100	100		Amino Acid	Methionine, Cysteine, SAM and Taurine Metabolism	1083	65-82-7	1787	190.054
	318			N-formylmethionine	LC/MS neg	2829	C03145	HMDB01015	439750			0.99	0.85	0.86		0.2845	0.2052	0.9492	0.5917	0.1821	0.3545	0.1638	0.3159		1.0782	1.0645	0.9197		100	100	100		Amino Acid	Methionine, Cysteine, SAM and Taurine Metabolism	194	4289-98-9	1543.8	176.039
	321			methionine sulfoxide	LC/MS pos early	18374	C02989	HMDB02005	158980			0.88	0.75	0.85		0.0514	0.0872	0.1794	0.2765	0.0165	0.1161	0.2169	0.3599		1.0849	0.9507	0.8111		100	100	100		Amino Acid	Methionine, Cysteine, SAM and Taurine Metabolism	100000039	3226-65-1	1272	166.053
	328			S-adenosylhomocysteine (SAH)	LC/MS neg	42382	C00021	HMDB00939	439155			0.53	0.48	0.9		0.2635	0.1993	0.2267	0.3146	0.1241	0.2908	0.7178	0.5826		1.6769	0.8928	0.8006		100	100	83		Amino Acid	Methionine, Cysteine, SAM and Taurine Metabolism	197	979-92-0	1832.4	383.114
	332			cystathionine	LC/MS pos early	15705	C02291	HMDB00099	439258			1.42	1.13	0.8		0.0505	0.0872	0.017	0.0831	0.3185	0.4398	0.1191	0.2867		0.9497	1.3459	1.0712		100	100	100		Amino Acid	Methionine, Cysteine, SAM and Taurine Metabolism	310	535-34-2	2270	223.075
	334			cysteine	LC/MS pos early	1868	C00097	HMDB00574	5862			1.5	1.53	1.02		0.1943	0.1669	0.1435	0.2516	0.1003	0.258	0.8385	0.6194		0.7021	1.0544	1.0744		83	83	100		Amino Acid	Methionine, Cysteine, SAM and Taurine Metabolism	800	52-90-4;56-89-3	1488	122.027
	336			S-methylcysteine	LC/MS polar	39592		HMDB02108	24417			1.14	1.05	0.92		0.4997	0.2873	0.2676	0.3425	0.7937	0.6446	0.39	0.4554		0.9294	1.0563	0.9733		100	100	100		Amino Acid	Methionine, Cysteine, SAM and Taurine Metabolism	100002749	1187-84-4	1942	134.028
	339			cysteine s-sulfate	LC/MS neg	22176	C05824	HMDB00731	115015			2.53	3.64	1.44		0.0053	0.0331	0.0058	0.0536	0.0032	0.0553	0.779	0.5984		0.3895	0.9846	1.4181		0	100	100		Amino Acid	Methionine, Cysteine, SAM and Taurine Metabolism	100000808	1637-71-4	640.9	199.969
	340			cystine	LC/MS polar	56	C00491	HMDB00192	67678			3.54	2	0.57		0.0016	0.0158	0.0004	0.0111	0.0755	0.223	0.0205	0.1893		0.328	1.162	0.6571		0	100	67		Amino Acid	Methionine, Cysteine, SAM and Taurine Metabolism	279	56-89-3	3424	239.017
	345			hypotaurine	LC/MS polar	590	C00519	HMDB00965	107812			1.16	0.97	0.84		0.7793	0.36	0.498	0.459	0.6356	0.6015	0.836	0.6194		1.1297	1.3102	1.0979		100	100	100		Amino Acid	Methionine, Cysteine, SAM and Taurine Metabolism	358	300-84-5	2763.4	108.012
	346			taurine	LC/MS pos early	2125	C00245	HMDB00251	1123			1.22	0.87	0.71		0.0884	0.1179	0.174	0.2717	0.3571	0.4529	0.0312	0.1893		1.0564	1.2924	0.9215		100	100	100		Amino Acid	Methionine, Cysteine, SAM and Taurine Metabolism	512	107-35-7	660	126.022
	347			N-acetyltaurine	LC/MS neg	48187			159864			1.36	0.96	0.7		0.0523	0.0872	0.0443	0.1359	0.8082	0.6446	0.0274	0.1893		0.9835	1.3396	0.9441		100	100	100		Amino Acid	Methionine, Cysteine, SAM and Taurine Metabolism	100005466		800	166.018
	353		Urea cycle; Arginine and Proline Metabolism	arginine	LC/MS pos early	1638	C00062	HMDB00517	232			0.84	0.92	1.09		0.602	0.3159	0.3421	0.3909	0.8175	0.6458	0.467	0.4847		1.133	0.954	1.0405		100	100	100		Amino Acid	Urea cycle; Arginine and Proline Metabolism	231	1119-34-2	2825	175.119
	354			argininosuccinate	LC/MS pos early	15497	C03406	HMDB00052	828			1.24	0.69	0.56		0.3436	0.2297	0.9597	0.5946	0.218	0.3794	0.201	0.348		1.2206	1.5173	0.8446		100	100	100		Amino Acid	Urea cycle; Arginine and Proline Metabolism	232	156637-58-0	2745	291.13
	355			urea	LC/MS pos early	1670	C00086	HMDB00294	1176			0.81	0.85	1.05		0.0167	0.0646	0.0066	0.0568	0.0284	0.1447	0.4791	0.4894		1.1661	0.9468	0.9958		100	100	100		Amino Acid	Urea cycle; Arginine and Proline Metabolism	533	57-13-6	700	121.072
	357			ornithine	LC/MS pos early	1493	C00077	HMDB03374	6262			0.81	0.78	0.97		0.3131	0.2182	0.1706	0.2675	0.2151	0.3794	0.8867	0.6371		1.2355	0.9979	0.9664		100	100	100		Amino Acid	Urea cycle; Arginine and Proline Metabolism	444	3184-13-2	2800	133.097
	360			2-oxoarginine*	LC/MS pos early	55072	C03771	HMDB04225	558			0.94	1.21	1.29		0.0674	0.1008	0.4013	0.416	0.121	0.2884	0.0241	0.1893		0.9581	0.8992	1.1568		100	100	100		Amino Acid	Urea cycle; Arginine and Proline Metabolism	100002784	3715-10-04	1760	174.087
	361			citrulline	LC/MS pos early	2132	C00327	HMDB00904	9750			0.98	1.07	1.1		0.1926	0.1669	0.6583	0.5095	0.1847	0.3564	0.0854	0.2489		0.9843	0.9603	1.0561		100	100	100		Amino Acid	Urea cycle; Arginine and Proline Metabolism	391	372-75-8	1520	176.103
	362			homoarginine	LC/MS pos early	22137	C01924	HMDB00670	9085			1.33	1.65	1.24		0.0005	0.0111	0.0088	0.0676	0.0001	0.0081	0.0566	0.2247		0.7932	1.0589	1.3123		100	100	100		Amino Acid	Urea cycle; Arginine and Proline Metabolism	100000961	156-86-5	2882	189.135
	363			homocitrulline	LC/MS polar	22138	C02427	HMDB00679	65072			0.55	0.58	1.05		0.0075	0.0406	0.005	0.0519	0.0067	0.09	0.8876	0.6371		1.4152	0.7801	0.8178		100	83	100		Amino Acid	Urea cycle; Arginine and Proline Metabolism	100000963	1190-49-4	3006.8	188.104
	364			proline	LC/MS pos early	1898	C00148	HMDB00162	145742			0.94	0.89	0.94		0.15	0.1555	0.354	0.3923	0.0556	0.1992	0.2807	0.4049		1.0678	1.009	0.9454		100	100	100		Amino Acid	Urea cycle; Arginine and Proline Metabolism	480	147-85-3	1603	116.071
	367			dimethylarginine (SDMA + ADMA)	LC/MS pos early	36808	C03626	HMDB01539	123831			1.05	1.07	1.02		0.2809	0.2042	0.3247	0.3806	0.1201	0.2879	0.5382	0.5094		0.9651	1.0092	1.0343		100	100	100		Amino Acid	Urea cycle; Arginine and Proline Metabolism	100001810	102783-24-4	2850	203.15
	369			N-acetylcitrulline	LC/MS neg	48434	C15532	HMDB00856	656979			0.63	0.82	1.3		0.0379	0.0828	0.013	0.0781	0.3529	0.4506	0.0828	0.2489		1.1803	0.7392	0.9646		100	67	100		Amino Acid	Urea cycle; Arginine and Proline Metabolism	100001577	33965-42-3	940	216.099
	371			N-delta-acetylornithine	LC/MS neg	43249			9920500			0.8	1.02	1.27		0.0141	0.0594	0.011	0.0734	0.9481	0.691	0.0096	0.1474		1.1027	0.8853	1.1241		100	100	100		Amino Acid	Urea cycle; Arginine and Proline Metabolism	100004523		858	173.093
	376			trans-4-hydroxyproline	LC/MS pos early	32306	C01157	HMDB00725	5810			1.37	1.19	0.87		0.0011	0.0128	0.0003	0.0096	0.0197	0.1257	0.0557	0.2247		0.8852	1.2101	1.0495		100	100	100		Amino Acid	Urea cycle; Arginine and Proline Metabolism	1001	51-35-4	1064	132.066
	378			pro-hydroxy-pro	LC/MS pos early	35127		HMDB06695	11673055			1.39	1.23	0.88		0.2435	0.1911	0.1083	0.2221	0.236	0.3884	0.6429	0.551		0.9185	1.2776	1.1253		100	100	100		Amino Acid	Urea cycle; Arginine and Proline Metabolism	100001167	18684-24-7	2128	229.118
	381			N-methylproline	LC/MS pos early	37431			557			0.95	1.2	1.26		0.241	0.1902	0.9483	0.5917	0.1384	0.312	0.1546	0.3094		0.8493	0.8104	1.0212		33	67	100		Amino Acid	Urea cycle; Arginine and Proline Metabolism	100001956	475-11-6	1335	130.086
	383			N-monomethylarginine	LC/MS pos early	43586	C03884	HMDB29416	132862			1.22	1.13	0.93		0.3607	0.2354	0.162	0.2632	0.4025	0.4772	0.5514	0.5164		0.9048	1.1016	1.022		100	100	100		Amino Acid	Urea cycle; Arginine and Proline Metabolism	100004488	53308-83-1	2845	189.135
	387		Creatine Metabolism	guanidinoacetate	LC/MS pos early	43802	C00581	HMDB00128	763			1.25	1.07	0.86		0.7071	0.3419	0.6427	0.5042	0.7191	0.6318	0.4141	0.4636		1.3479	1.6901	1.4464		100	100	100		Amino Acid	Creatine Metabolism	344	352-97-6	1937	118.061
	388			creatine	LC/MS pos early	27718	C00300	HMDB00064	586			1.35	0.92	0.68		0.1741	0.1588	0.1663	0.2632	0.6654	0.6132	0.0774	0.2436		1.0699	1.443	0.9857		100	100	100		Amino Acid	Creatine Metabolism	1221	57-00-1	1947	132.077
	389			creatinine	LC/MS pos early	513	C00791	HMDB00562	588			1.16	1	0.86		0.1617	0.1562	0.0988	0.2185	0.9988	0.6982	0.0991	0.258		0.9916	1.1485	0.9884		100	100	100		Amino Acid	Creatine Metabolism	275	60-27-5	2055	114.066
	395		Polyamine Metabolism	putrescine	LC/MS pos early	1408	C00134	HMDB01414	1045			1.34	0.77	0.57		0.1901	0.1669	0.2508	0.3307	0.4867	0.5293	0.0757	0.2422		1.1719	1.5734	0.8976		83	83	100		Amino Acid	Polyamine Metabolism	49	110-60-1	3027	89.1073
	397			spermidine	LC/MS pos early	485	C00315	HMDB01257	1102			1.54	0.79	0.51		0.2669	0.2004	0.2281	0.3153	0.7221	0.6326	0.1262	0.289		1.0833	1.6632	0.8555		100	100	100		Amino Acid	Polyamine Metabolism	50	124-20-9	3355	146.165
	405			5-methylthioadenosine (MTA)	LC/MS pos early	1419	C00170	HMDB01173	439176			2.11	1.33	0.63		0.0501	0.0872	0.0162	0.0828	0.2494	0.3932	0.1521	0.3088		0.7752	1.6365	1.0297		100	100	100		Amino Acid	Polyamine Metabolism	212	2457-80-9	2752	298.097
	406			N-acetylputrescine	LC/MS pos early	37496	C02714	HMDB02064	122356			1.27	0.88	0.69		0.1133	0.1343	0.1197	0.2331	0.6262	0.6015	0.0485	0.2215		0.871	1.1064	0.7647		50	100	50		Amino Acid	Polyamine Metabolism	192	18233-70-0	2230	131.118
	410			4-acetamidobutanoate	LC/MS pos early	1558	C02946	HMDB03681	18189			1.11	1.03	0.93		0.6979	0.3406	0.427	0.4332	0.8604	0.6648	0.5333	0.5094		0.9252	1.0289	0.9544		100	100	100		Amino Acid	Polyamine Metabolism	1113	3025-96-5	1350	146.081
	412			(N(1) + N(8))-acetylspermidine	LC/MS pos early	57814						1.25	1.76	1.4		0.1679	0.1571	0.2517	0.3307	0.0646	0.2093	0.4348	0.4673		0.7523	0.9417	1.3229		83	100	100		Amino Acid	Polyamine Metabolism	100016038		3080	188.176
	414		Guanidino and Acetamido Metabolism	4-guanidinobutanoate	LC/MS pos early	15681	C01035	HMDB03464	500			1.13	0.79	0.7		0.4276	0.2619	0.5058	0.4603	0.5196	0.5463	0.1998	0.348		1.1178	1.2613	0.882		67	100	100		Amino Acid	Guanidino and Acetamido Metabolism	100000096	463-003;463-00-3	2320	146.092
	418		Glutathione Metabolism	glutathione, oxidized (GSSG)	LC/MS pos early	27727	C00127	HMDB03337	65359			2.19	1.28	0.58		0.0408	0.0834	0.0136	0.0794	0.1008	0.258	0.3119	0.4198		0.8895	1.9507	1.139		100	100	100		Amino Acid	Glutathione Metabolism	448	103239-24-3	2667	613.159
	420			cysteine-glutathione disulfide	LC/MS pos early	35159		HMDB00656	4247235			11.75	8.48	0.72		1.4259e-05	0.0007	9.8584e-06	0.0007	3.1539e-05	0.0044	0.5237	0.5094		0.122	1.4335	1.0344		83	100	100		Amino Acid	Glutathione Metabolism	100001437	13081-14-6	2465	427.095
	426			5-oxoproline	LC/MS neg	1494	C01879	HMDB00267	7405			0.98	0.99	1.02		0.9893	0.4146	0.9108	0.5849	0.9819	0.6945	0.8928	0.638		1.0523	1.0262	1.043		100	100	100		Amino Acid	Glutathione Metabolism	1021	98-79-3	738.5	128.035
	429			2-hydroxybutyrate/2-hydroxyisobutyrate	LC/MS polar	52281						0.75	0.79	1.05		0.0255	0.0744	0.0119	0.0746	0.029	0.1447	0.6634	0.5566		1.2677	0.9479	0.999		100	100	100		Amino Acid	Glutathione Metabolism	100008928		1258	103.04
	431			ophthalmate	LC/MS pos early	34592		HMDB05765	7018721			0.8	0.82	1.02		0.8818	0.3872	0.6616	0.5108	0.9831	0.6945	0.6769	0.5641		1.3568	1.0838	1.1078		100	100	100		Amino Acid	Glutathione Metabolism	100001311	495-27-2	2085	290.135
	441	Peptide	Gamma-glutamyl Amino Acid	gamma-glutamylglutamine	LC/MS pos early	2730	C05283	HMDB11738	150914			0.91	1.78	1.97		0.1704	0.1571	0.5459	0.4764	0.0696	0.2134	0.2013	0.348		0.9472	0.8583	1.6893		100	100	100		Peptide	Gamma-glutamyl Amino Acid	1140	10148-81-9	1430	276.119
	442			gamma-glutamylglycine	LC/MS pos early	33949		HMDB11667	165527			1.1	0.97	0.88		0.6116	0.3194	0.4051	0.416	0.9751	0.6945	0.3884	0.4554		0.9828	1.0789	0.9491		100	100	100		Peptide	Gamma-glutamyl Amino Acid	100001294	1948-29-4	1535	205.082
	443			gamma-glutamylhistidine	LC/MS pos early	18245			7017195			1.25	1.35	1.08		0.0788	0.1092	0.1282	0.2418	0.029	0.1447	0.4335	0.4672		0.7856	0.9818	1.0636		100	100	100		Peptide	Gamma-glutamyl Amino Acid	1235	37460-15-4	2740	285.119
	444			gamma-glutamylisoleucine*	LC/MS pos early	34456		HMDB11170	14253342			0.91	0.89	0.98		0.6188	0.3198	0.4499	0.4452	0.368	0.4597	0.881	0.6358		1.031	0.9385	0.9158		100	83	100		Peptide	Gamma-glutamyl Amino Acid	100001485		2940	261.144
	445			gamma-glutamylleucine	LC/MS pos early	18369		HMDB11171	151023			0.96	1.04	1.08		0.7697	0.3576	0.7006	0.5233	0.7406	0.6368	0.4771	0.4887		0.9838	0.9492	1.0229		100	100	100		Peptide	Gamma-glutamyl Amino Acid	1268	2566-39-4	2991	261.144
	446			gamma-glutamyl-alpha-lysine	LC/MS pos early	55015			65254			1.14	1.23	1.08		0.2733	0.2018	0.2563	0.3328	0.1241	0.2908	0.66	0.5566		0.8569	0.9808	1.0555		100	100	100		Peptide	Gamma-glutamyl Amino Acid	100010901		2784	276.155
	447			gamma-glutamyl-epsilon-lysine	LC/MS pos early	33934		HMDB03869	7015685			1.21	1.58	1.31		0.0021	0.019	0.0975	0.2185	0.0006	0.0162	0.0213	0.1893		0.7857	0.9517	1.2436		100	100	100		Peptide	Gamma-glutamyl Amino Acid	100001262	17105-15-6	2717	276.155
	448			gamma-glutamylmethionine	LC/MS neg	44872		HMDB29155	7009567			1.22	3.47	2.85		0.2648	0.1997	0.9559	0.5939	0.1534	0.3287	0.1683	0.3213		0.387	0.4706	1.3427		33	33	83		Peptide	Gamma-glutamyl Amino Acid	100001313	17663-87-5	1268	277.086
	449			gamma-glutamylphenylalanine	LC/MS pos early	33422		HMDB00594	111299			0.83	1.1	1.33		0.1136	0.1343	0.1389	0.2488	0.5472	0.5558	0.0457	0.2166		1.033	0.8532	1.1388		100	100	100		Peptide	Gamma-glutamyl Amino Acid	100000491	7432-24-8	2992	295.129
	450			gamma-glutamylthreonine	LC/MS pos early	33364		HMDB29159	76078708			1.03	1.05	1.02		0.8583	0.3806	0.7802	0.5477	0.5867	0.5807	0.7897	0.6032		1.0335	1.0675	1.084		100	100	100		Peptide	Gamma-glutamyl Amino Acid	100001314	5652-48-2	1750	249.108
	451			gamma-glutamyltryptophan	LC/MS pos early	33947		HMDB29160	3989307			1.02	0.92	0.9		0.8343	0.375	0.7906	0.5518	0.743	0.6368	0.5546	0.517		0.9556	0.9748	0.882		100	100	100		Peptide	Gamma-glutamyl Amino Acid	100001295	66471-20-3	2975	334.14
	452			gamma-glutamyltyrosine	LC/MS neg	2734		HMDB11741	94340			1.12	1.12	1		0.7919	0.3645	0.5031	0.459	0.7007	0.6209	0.7726	0.5978		1.0102	1.13	1.1273		100	100	100		Peptide	Gamma-glutamyl Amino Acid	1102	7432-23-7	1240	309.109
	453			gamma-glutamylvaline	LC/MS pos early	43829		HMDB11172	7015683			1.05	1.12	1.06		0.5607	0.3041	0.8737	0.5805	0.3238	0.4429	0.4041	0.4607		0.9914	1.0424	1.1098		100	100	100		Peptide	Gamma-glutamyl Amino Acid	100001126	2746-34-1	2700	247.129
	878		Acetylated Peptides	phenylacetylglycine	LC/MS pos early	33945	C05598	HMDB00821	68144			1.06	0.56	0.53		0.0119	0.0527	0.9363	0.5898	0.0096	0.0949	0.0081	0.1474		1.0553	1.1162	0.5937		100	100	100		Peptide	Acetylated Peptides	100001275	500-98-1	2317	194.081
	903	Carbohydrate	Glycolysis, Gluconeogenesis, and Pyruvate Metabolism	1,5-anhydroglucitol (1,5-AG)	LC/MS neg	20675	C07326	HMDB02712	64960			1.29	1.28	0.99		0.1717	0.1577	0.074	0.1956	0.1755	0.3501	0.6253	0.5451		0.8849	1.1399	1.13		100	100	100		Carbohydrate	Glycolysis, Gluconeogenesis, and Pyruvate Metabolism	100000580	154-58-5	802	163.061
	906			glucose	LC/MS polar	20488	C00031	HMDB00122	79025			0.76	0.75	0.99		0.0416	0.0839	0.0351	0.1211	0.0225	0.1315	0.8243	0.6153		1.2212	0.9297	0.9175		100	100	100		Carbohydrate	Glycolysis, Gluconeogenesis, and Pyruvate Metabolism	572	50-99-7	2342	179.056
	920			3-phosphoglycerate	LC/MS neg	1414	C00597	HMDB00807	724			4.84	0.95	0.2		0.1003	0.1252	0.0616	0.1704	0.983	0.6945	0.0642	0.2309		1.0302	4.9833	0.9748		67	100	100		Carbohydrate	Glycolysis, Gluconeogenesis, and Pyruvate Metabolism	132	80731-10-8	583	184.986
	921			phosphoenolpyruvate (PEP)	LC/MS neg	597	C00074	HMDB00263	1005			6.49	1.41	0.22		0.0387	0.0828	0.0152	0.0815	0.509	0.5448	0.057	0.2247		0.5857	3.7996	0.8236		67	100	67		Carbohydrate	Glycolysis, Gluconeogenesis, and Pyruvate Metabolism	463	10526-80-4	587.3	166.975
	922			pyruvate	LC/MS neg	42582	C00022	HMDB00243	1060			0.77	0.84	1.1		0.0917	0.1197	0.032	0.1114	0.1968	0.3641	0.327	0.4242		1.0937	0.8396	0.9241		100	100	100		Carbohydrate	Glycolysis, Gluconeogenesis, and Pyruvate Metabolism	823	127-17-3	732.4	87.0088
	923			lactate	LC/MS polar	527	C00186	HMDB00190	612			1	0.72	0.71		0.0523	0.0872	0.9626	0.595	0.0359	0.1693	0.0327	0.1894		1.1705	1.1741	0.8381		100	100	100		Carbohydrate	Glycolysis, Gluconeogenesis, and Pyruvate Metabolism	482	79-33-4	1468.8	89.0244
	926			glycerate	LC/MS polar	1572	C00258	HMDB00139	752			0.63	0.52	0.81		0.0005	0.0111	0.0037	0.0444	0.0002	0.0083	0.1401	0.2995		1.5334	0.9733	0.7903		100	100	100		Carbohydrate	Glycolysis, Gluconeogenesis, and Pyruvate Metabolism	1052	600-19-1	2070.4	105.019
	940		Pentose Metabolism	ribose	LC/MS polar	1471	C00121	HMDB00283	5779			0.57	0.52	0.91		0.1065	0.1289	0.0856	0.2096	0.0538	0.1992	0.8038	0.6092		1.7642	1.0025	0.9126		100	100	100		Carbohydrate	Pentose Metabolism	914	50-69-1	1508.2	195.051
	941			ribitol	LC/MS polar	15772	C00474	HMDB00508	6912			1.01	0.75	0.75		0.1345	0.1472	0.8864	0.5819	0.0953	0.2501	0.0733	0.2422		1.1455	1.1533	0.8624		100	100	100		Carbohydrate	Pentose Metabolism	100000406	488-81-3	1789.6	151.061
	942			ribonate	LC/MS polar	27731	C01685	HMDB00867	5460677			1.06	0.95	0.9		0.7216	0.3456	0.6806	0.519	0.6971	0.6209	0.427	0.4672		0.9994	1.0629	0.9538		100	100	100		Carbohydrate	Pentose Metabolism	100001007	5336-08-03	2425	165.04
	963			arabitol/xylitol	LC/MS polar	48885	C01904		6912			1.1	0.87	0.79		0.1125	0.1342	0.3219	0.3786	0.2395	0.3886	0.04	0.2015		1.0888	1.1967	0.9435		100	100	100		Carbohydrate	Pentose Metabolism	100006430		1932.4	151.061
	965			arabonate/xylonate	LC/MS polar	48255						0.83	0.82	0.99		0.1038	0.127	0.0605	0.1687	0.07	0.2134	0.9383	0.643		1.1343	0.9387	0.9331		100	100	100		Carbohydrate	Pentose Metabolism	100006115		2700	165.04
	966			sedoheptulose	LC/MS polar	53237		HMDB03219	5459879			1.09	0.68	0.62		0.6908	0.34	0.6284	0.5042	0.7136	0.6283	0.399	0.4562		1.3051	1.4229	0.8883		100	100	100		Carbohydrate	Pentose Metabolism	100002619	3019-74-7	2255	209.067
	967			ribulonate/xylulonate*	LC/MS polar	61858						0.52	0.51	0.97		0.0004	0.0111	0.0006	0.0139	0.0003	0.0112	0.7767	0.5978		1.6277	0.8482	0.8221		100	100	100		Carbohydrate	Pentose Metabolism	100019968		2350	165.04
	998		Disaccharides and Oligosaccharides	sucrose	LC/MS polar	1519	C00089	HMDB00258	5988			0.55	0.48	0.87		0.8593	0.3806	0.7157	0.5268	0.5963	0.5874	0.8672	0.6317		2.2391	1.2365	1.0718		50	83	67		Carbohydrate	Disaccharides and Oligosaccharides	935	57-50-1	3092	387.114
	1016		Fructose, Mannose and Galactose Metabolism	fructose	LC/MS polar	577	C00095	HMDB00660	5984			0.64	0.77	1.21		0.2286	0.1836	0.0964	0.2185	0.2556	0.3986	0.5629	0.5185		1.4184	0.9017	1.0894		100	100	100		Carbohydrate	Fructose, Mannose and Galactose Metabolism	878	57-48-7	2065	179.056
	1021			mannitol/sorbitol	LC/MS polar	46142	C00794	HMDB00247	5780			0.59	0.45	0.76		0.0564	0.0907	0.1044	0.2198	0.0201	0.1262	0.3971	0.4562		1.8263	1.0863	0.8236		100	100	100		Carbohydrate	Fructose, Mannose and Galactose Metabolism	100001740		2320	181.072
	1022			mannose	LC/MS polar	584	C00159	HMDB00169	18950			0.83	0.86	1.04		0.3747	0.2402	0.1947	0.2925	0.282	0.4177	0.8123	0.6121		1.1244	0.9304	0.9657		100	100	100		Carbohydrate	Fructose, Mannose and Galactose Metabolism	803	3458-28-4	2200	179.056
	1032			galactitol (dulcitol)	LC/MS polar	1117	C01697	HMDB00107	11850			0.98	0.91	0.94		0.9917	0.4149	0.9166	0.5877	0.9921	0.6973	0.9088	0.638		1.1051	1.0794	1.0104		100	100	100		Carbohydrate	Fructose, Mannose and Galactose Metabolism	1003	608-66-2	2360	181.072
	1041			galactonate	LC/MS polar	27719	C00880	HMDB00565	128869			1.24	0.94	0.76		0.5527	0.302	0.472	0.4519	0.7311	0.6368	0.2938	0.4119		1.0245	1.2675	0.9661		100	100	100		Carbohydrate	Fructose, Mannose and Galactose Metabolism	100001026	299-28-5	3085	195.051
	1069		Aminosugar Metabolism	glucuronate	LC/MS polar	15443	C00191	HMDB00127	444791			0.91	1.23	1.35		0.2967	0.2092	0.9022	0.5846	0.2002	0.3674	0.1636	0.3159		0.943	0.8555	1.1588		100	100	100		Carbohydrate	Aminosugar Metabolism	100000257	207300-70-7	3233.3	193.035
	1080			N-acetylneuraminate	LC/MS polar	32377	C00270	HMDB00230	439197			1.21	0.98	0.82		0.6603	0.3308	0.4444	0.4434	0.9776	0.6945	0.4284	0.4672		1.0101	1.2194	0.994		100	100	100		Carbohydrate	Aminosugar Metabolism	1162	131-48-6	3072.6	308.099
	1092			erythronate*	LC/MS polar	42420		HMDB00613	2781043			0.98	0.9	0.91		0.3549	0.2329	0.7499	0.5358	0.1754	0.3501	0.2897	0.4119		1.0606	1.0405	0.9506		100	100	100		Carbohydrate	Aminosugar Metabolism	100001320	88759-55-1	2186	135.03
	1094			N-acetylglucosamine/N-acetylgalactosamine	LC/MS pos early	46539		HMDB00215	24139			1.21	0.9	0.75		0.4741	0.2793	0.2451	0.3277	0.7517	0.6386	0.3889	0.4554		1.0255	1.2395	0.9252		100	100	100		Carbohydrate	Aminosugar Metabolism	100006435		715	222.097
	1099	Energy	TCA Cycle	citrate	LC/MS neg	1564	C00158	HMDB00094	311			1	0.87	0.87		0.0009	0.0111	0.936	0.5898	0.0009	0.0201	0.0008	0.0996		1.0413	1.045	0.9094		100	100	100		Energy	TCA Cycle	1124	77-92-9	582	191.02
	1101			aconitate [cis or trans]	LC/MS neg	46173						1.26	1.17	0.93		0.0531	0.0872	0.0198	0.0873	0.0855	0.2349	0.4547	0.4782		0.8523	1.0781	0.9981		100	100	100		Energy	TCA Cycle	100001359		580	173.009
	1103			isocitrate	LC/MS pos early	12110	C00311	HMDB00193	1198			1.41	0.9	0.64		0.0258	0.0744	0.0391	0.1282	0.514	0.5448	0.0104	0.1474		1.0152	1.43	0.9106		100	100	100		Energy	TCA Cycle	1206	20226-99-7	773	210.061
	1105			alpha-ketoglutarate	LC/MS polar	528	C00026	HMDB00208	51			1.33	0.94	0.71		0.2674	0.2004	0.2362	0.3204	0.6996	0.6209	0.1245	0.289		1.028	1.3675	0.9641		100	100	100		Energy	TCA Cycle	93	305-72-6;328-50-7;22202-68-2	2700	145.014
	1108			succinate	LC/MS neg	1437	C00042	HMDB00254	1110			0.74	0.24	0.32		0.3801	0.243	0.8384	0.5697	0.2772	0.4144	0.2017	0.348		2.9538	2.1963	0.7074		100	100	100		Energy	TCA Cycle	252	110-15-6	603	117.019
	1109			fumarate	LC/MS polar	1643	C00122	HMDB00134	444972			1.18	0.77	0.65		0.5028	0.2873	0.4173	0.4246	0.7459	0.6378	0.2625	0.3972		1.1643	1.3761	0.9002		100	100	100		Energy	TCA Cycle	330	100-17-8	3084	115.004
	1110			malate	LC/MS polar	1303	C00149	HMDB00156	525			1.66	0.43	0.26		0.0904	0.1193	0.3834	0.4073	0.1648	0.3417	0.0323	0.1894		1.8707	3.1147	0.8104		100	100	100		Energy	TCA Cycle	409	6915-15-7	3343.1	133.014
	1120			2-methylcitrate/homocitrate	LC/MS neg	52282						0.91	0.73	0.79		0.0588	0.0923	0.503	0.459	0.0228	0.1315	0.0841	0.2489		1.1564	1.0578	0.8404		100	100	100		Energy	TCA Cycle	100008929		575	205.035
	1124		Oxidative Phosphorylation	phosphate	LC/MS neg	42109	C00009	HMDB01429	1061			1.15	1.05	0.92		0.9005	0.3921	0.9286	0.5898	0.6694	0.6133	0.7353	0.5889		0.8916	1.027	0.94		100	100	100		Energy	Oxidative Phosphorylation	461	7664-38-2	608	96.9696
	1127	Lipid	Fatty Acid Synthesis	malonate	LC/MS neg	15872	C00383	HMDB00691	867			1.26	1.14	0.9		0.0688	0.1012	0.0228	0.0951	0.2059	0.3718	0.2438	0.3815		0.899	1.1366	1.0232		100	100	100		Lipid	Fatty Acid Synthesis	818	141-82-2;26522-22-85-0	612	103.004
	1144		Medium Chain Fatty Acid	caprylate (8:0)	LC/MS neg	32492	C06423	HMDB00482	379			0.76	0.77	1.01		0.2415	0.1902	0.1245	0.2398	0.1776	0.3507	0.8347	0.6194		0.9654	0.7383	0.746		67	33	50		Lipid	Medium Chain Fatty Acid	932	124-07-2	4362	143.108
	1145			pelargonate (9:0)	LC/MS neg	12035	C01601	HMDB00847	8158			0.8	0.76	0.95		0.094	0.1202	0.0947	0.2185	0.0417	0.1799	0.6637	0.5566		1.0643	0.8478	0.808		67	83	33		Lipid	Medium Chain Fatty Acid	437	112-05-0	4798	157.123
	1146			caprate (10:0)	LC/MS neg	1642	C01571	HMDB00511	2969			1.08	0.93	0.86		0.632	0.3246	0.7164	0.5268	0.5614	0.561	0.3503	0.4367		1.0102	1.0919	0.9398		100	100	100		Lipid	Medium Chain Fatty Acid	888	112-37-8	5090.7	171.139
	1147			undecanoate (11:0)	LC/MS neg	12067	C17715	HMDB00947	8180			0.96	0.94	0.99		0.9527	0.4054	0.7617	0.541	0.851	0.6609	0.9078	0.638		1.0938	1.0469	1.0322		100	100	100		Lipid	Medium Chain Fatty Acid	889	334-48-5	5219.2	185.155
	1148			10-undecenoate (11:1n1)	LC/MS neg	32497	C13910	HMDB33724	14891			0.99	0.86	0.87		0.4155	0.2595	0.8778	0.5805	0.2295	0.3855	0.2903	0.4119		1.0398	1.0281	0.8906		100	100	100		Lipid	Medium Chain Fatty Acid	100001197	1333-28-4	5085.8	183.139
	1149			laurate (12:0)	LC/MS neg	1645	C02679	HMDB00638	3893			1.6	1.77	1.11		0.1575	0.1562	0.1833	0.2801	0.0645	0.2093	0.5573	0.517		0.7378	1.1824	1.3073		100	100	100		Lipid	Medium Chain Fatty Acid	181	143-07-7	5300	199.17
	1150			5-dodecenoate (12:1n7)	LC/MS neg	33968		HMDB00529	5312378			1.23	1.5	1.22		0.3399	0.2294	0.5326	0.4719	0.15	0.3269	0.3935	0.4562		0.8379	1.0306	1.2586		100	100	100		Lipid	Medium Chain Fatty Acid	100001232	2430-94-6	5224	197.155
	1152		Long Chain Fatty Acid	myristate (14:0)	LC/MS neg	1365	C06424	HMDB00806	11005			1.61	1.8	1.12		0.1022	0.1267	0.1321	0.2451	0.0403	0.178	0.5245	0.5094		0.7631	1.2265	1.3743		100	100	100		Lipid	Long Chain Fatty Acid	519	544-63-8	5440	227.202
	1153			myristoleate (14:1n5)	LC/MS neg	32418	C08322	HMDB02000	5281119			1.28	1.75	1.37		0.1182	0.137	0.4997	0.459	0.046	0.189	0.1586	0.3103		0.8322	1.064	1.4603		100	100	100		Lipid	Long Chain Fatty Acid	100001198	544-64-9	5346.9	225.186
	1156			pentadecanoate (15:0)	LC/MS neg	1361	C16537	HMDB00826	13849			0.99	0.98	0.99		0.942	0.4022	0.7784	0.5476	0.7595	0.6386	0.9802	0.6568		0.9947	0.9875	0.975		100	100	100		Lipid	Long Chain Fatty Acid	980	1002-84-2;10002-84-2	5521	241.217
	1157			palmitate (16:0)	LC/MS neg	1336	C00249	HMDB00220	985			0.99	1	1.01		0.9575	0.4063	0.7728	0.5467	0.8673	0.6648	0.903	0.638		1.0006	0.989	0.9959		100	100	100		Lipid	Long Chain Fatty Acid	424	57-10-3	5618	255.233
	1158			palmitoleate (16:1n7)	LC/MS neg	33447	C08362	HMDB03229	445638			1.35	1.78	1.31		0.0667	0.1008	0.2306	0.3176	0.022	0.1315	0.2118	0.3572		0.8432	1.1405	1.4976		100	100	100		Lipid	Long Chain Fatty Acid	452	373-49-9	5475	253.217
	1160			margarate (17:0)	LC/MS neg	1121		HMDB02259	10465			1.01	0.98	0.97		0.9581	0.4063	0.9056	0.5846	0.7747	0.6412	0.8666	0.6317		0.9965	1.0045	0.976		100	100	100		Lipid	Long Chain Fatty Acid	891	506-12-7	5731	269.249
	1161			10-heptadecenoate (17:1n7)	LC/MS neg	33971		HMDB60038	5312435			1.14	1.43	1.25		0.2895	0.2081	0.706	0.5257	0.1362	0.3095	0.2525	0.3892		0.9289	1.0607	1.331		100	100	100		Lipid	Long Chain Fatty Acid	100001278	29743-97-3	5555	267.233
	1163			stearate (18:0)	LC/MS neg	1358	C01530	HMDB00827	5281			0.98	0.9	0.92		0.3234	0.221	0.6714	0.5142	0.1505	0.3269	0.2961	0.4119		1.0134	0.9928	0.9089		100	100	100		Lipid	Long Chain Fatty Acid	439	57-11-4	5872	283.264
	1165			oleate/vaccenate (18:1)	LC/MS neg	52285						1.01	1.18	1.16		0.5068	0.2877	0.9773	0.6009	0.3247	0.4429	0.3116	0.4198		0.9513	0.9631	1.1189		100	100	100		Lipid	Long Chain Fatty Acid	100008930		5655	281.249
	1172			nonadecanoate (19:0)	LC/MS neg	1356	C16535	HMDB00772	12591			1.08	1.06	0.99		0.8434	0.3777	0.593	0.4964	0.6525	0.6094	0.9321	0.643		1.0388	1.12	1.1035		100	100	100		Lipid	Long Chain Fatty Acid	892	646-30-0	6068	297.28
	1173			10-nonadecenoate (19:1n9)	LC/MS neg	33972		HMDB13622	5312513			0.9	1.12	1.25		0.4236	0.2608	0.4319	0.4358	0.6025	0.5907	0.2003	0.348		0.9981	0.8943	1.1156		100	100	100		Lipid	Long Chain Fatty Acid	100001277	73033-09-7	5780	295.264
	1176			arachidate (20:0)	LC/MS neg	1118	C06425	HMDB02212	10467			0.93	1.02	1.1		0.5364	0.2986	0.3554	0.3923	0.9502	0.6913	0.3252	0.4242		1.0136	0.9383	1.0301		100	100	100		Lipid	Long Chain Fatty Acid	893	506-30-9	6240	311.296
	1179			eicosenoate (20:1)	LC/MS neg	33587	C16526	HMDB02231	5282768			0.94	1.14	1.21		0.5836	0.3107	0.565	0.4884	0.6479	0.6072	0.3084	0.4197		1.0678	1.0023	1.2149		100	100	100		Lipid	Long Chain Fatty Acid	100001335		5950	309.28
	1183			behenate (22:0)*	LC/MS neg	12125	C08281	HMDB00944	8215			0.86	1.06	1.22		0.5798	0.3107	0.3914	0.4114	0.9432	0.6908	0.3547	0.4367		1.0219	0.8818	1.0795		100	83	100		Lipid	Long Chain Fatty Acid	314	112-85-6	6745	339.327
	1184			erucate (22:1n9)	LC/MS neg	1552	C08316	HMDB02068	5281116			0.8	1.21	1.52		0.1773	0.1607	0.3414	0.3909	0.3379	0.4498	0.0673	0.231		0.9676	0.7717	1.1735		100	100	100		Lipid	Long Chain Fatty Acid	1087	112-86-7	6355.6	337.311
	1187			nervonate (24:1n9)*	LC/MS neg	52674	C08323	HMDB02368	5281120			0.33	0.78	2.37		0.3675	0.2374	0.1658	0.2632	0.4082	0.4795	0.5538	0.517		1.4289	0.4711	1.118		100	50	67		Lipid	Long Chain Fatty Acid	100001231	506-37-6	6804	365.342
	1190		Polyunsaturated Fatty Acid (n3 and n6)	heneicosapentaenoate (21:5n3)	LC/MS neg	57658			11998573			1.39	1.37	0.99		0.5615	0.3041	0.3905	0.4114	0.3322	0.4498	0.9078	0.638		0.874	1.2166	1.1997		100	100	100		Lipid	Polyunsaturated Fatty Acid (n3 and n6)	100015797	24257-10-1	5514	315.233
	1191			hexadecadienoate (16:2n6)	LC/MS neg	57652		HMDB00477				1.24	1.43	1.15		0.4915	0.2873	0.497	0.459	0.2426	0.3899	0.6103	0.5381		0.8827	1.0956	1.264		100	100	100		Lipid	Polyunsaturated Fatty Acid (n3 and n6)	100009394	28290-73-5	5398	251.202
	1195			stearidonate (18:4n3)	LC/MS neg	33969	C16300	HMDB06547	5312508			1.76	1.71	0.97		0.1924	0.1669	0.0977	0.2185	0.1455	0.3226	0.8207	0.6146		0.7001	1.233	1.1964		100	100	100		Lipid	Polyunsaturated Fatty Acid (n3 and n6)	100001229	111174-40-4	5395	275.202
	1196			eicosapentaenoate (EPA; 20:5n3)	LC/MS neg	18467	C06428	HMDB01999	446284			1.22	1.13	0.92		0.7298	0.3462	0.444	0.4434	0.802	0.6446	0.6033	0.5344		1.0073	1.2302	1.1336		100	100	100		Lipid	Polyunsaturated Fatty Acid (n3 and n6)	2050	10-2005-9;10417-94-4	5450	301.217
	1197			docosapentaenoate (n3 DPA; 22:5n3)	LC/MS neg	32504	C16513	HMDB06528	6441454			1.09	1.23	1.13		0.5658	0.3058	0.944	0.5911	0.3447	0.4498	0.3801	0.4544		0.9285	1.0077	1.1408		100	100	100		Lipid	Polyunsaturated Fatty Acid (n3 and n6)	100001181	2234-74-4	5571	329.249
	1198			docosahexaenoate (DHA; 22:6n3)	LC/MS neg	44675	C06429	HMDB02183	445580			0.9	0.98	1.08		0.7431	0.3511	0.4556	0.4456	0.7961	0.6446	0.6224	0.544		1.0766	0.9701	1.0525		100	100	100		Lipid	Polyunsaturated Fatty Acid (n3 and n6)	100000665	6217-54-5	5525	327.233
	1199			docosatrienoate (22:3n3)	LC/MS neg	32417	C16534	HMDB02823	5312556			0.65	1.32	2.01		0.0071	0.039	0.0546	0.1557	0.1193	0.2879	0.002	0.1155		0.8547	0.5595	1.1258		100	50	100		Lipid	Polyunsaturated Fatty Acid (n3 and n6)	100001195	59708-86-0	5823	333.28
	1202			nisinate (24:6n3)	LC/MS neg	57810		HMDB02007	11792612			1.03	1.13	1.1		0.6933	0.3402	0.923	0.5898	0.4969	0.5358	0.4392	0.4689		0.934	0.963	1.0562		100	100	100		Lipid	Polyunsaturated Fatty Acid (n3 and n6)	100015785	68378-49-4	5657	355.264
	1203			linoleate (18:2n6)	LC/MS neg	1105	C01595	HMDB00673	5280450			1.12	1.25	1.12		0.665	0.3312	0.7142	0.5268	0.3768	0.4626	0.5988	0.5328		0.9359	1.0456	1.1742		100	100	100		Lipid	Polyunsaturated Fatty Acid (n3 and n6)	180	60-33-3	5535	279.233
	1205			linolenate [alpha or gamma; (18:3n3 or 6)]	LC/MS neg	34035	C06426	HMDB03073	5280934			1.59	1.73	1.08		0.1945	0.1669	0.1659	0.2632	0.0916	0.2435	0.734	0.5889		0.8206	1.3074	1.4185		100	100	100		Lipid	Polyunsaturated Fatty Acid (n3 and n6)	100001337		5450	277.217
	1207			dihomo-linolenate (20:3n3 or n6)	LC/MS neg	35718	C03242	HMDB02925	5280581			1.19	1.37	1.15		0.3988	0.2511	0.6308	0.5042	0.188	0.3576	0.3881	0.4554		0.8708	1.0382	1.1904		100	100	100		Lipid	Polyunsaturated Fatty Acid (n3 and n6)	100001739	17046-59-2	5596	305.249
	1208			arachidonate (20:4n6)	LC/MS neg	1110	C00219	HMDB01043	444899			0.97	0.95	0.98		0.8549	0.3806	0.6259	0.5042	0.6405	0.6028	0.9835	0.6579		1.0273	0.993	0.9733		100	100	100		Lipid	Polyunsaturated Fatty Acid (n3 and n6)	229	506-32-1	5535	303.233
	1209			adrenate (22:4n6)	LC/MS neg	32980	C16527	HMDB02226	5497181			1.07	1.13	1.05		0.7776	0.3599	0.7277	0.5297	0.4854	0.5293	0.7235	0.5843		0.9907	1.0566	1.1146		100	100	100		Lipid	Polyunsaturated Fatty Acid (n3 and n6)	100001193	2091-25-0	5678	331.264
	1210			docosapentaenoate (n6 DPA; 22:5n6)	LC/MS neg	37478	C16513	HMDB01976	6441454			0.84	0.99	1.18		0.4943	0.2873	0.2918	0.3512	0.9333	0.6879	0.3297	0.4242		1.059	0.8874	1.048		100	100	100		Lipid	Polyunsaturated Fatty Acid (n3 and n6)	100001580	25182-74-5	5624.5	329.249
	1211			docosadienoate (22:2n6)	LC/MS neg	32415	C16533	HMDB61714	5282807			0.81	1.24	1.54		0.0931	0.1197	0.2727	0.3455	0.2399	0.3886	0.0321	0.1894		0.9224	0.7442	1.1429		100	100	100		Lipid	Polyunsaturated Fatty Acid (n3 and n6)	100001182	7370-49-2	6034	335.296
	1212			dihomo-linoleate (20:2n6)	LC/MS neg	17805	C16525	HMDB05060	6439848			1.1	1.44	1.31		0.2113	0.1753	0.9329	0.5898	0.1196	0.2879	0.1384	0.2995		0.9044	0.9904	1.2997		100	100	100		Lipid	Polyunsaturated Fatty Acid (n3 and n6)	1231	2091-39-6	5730	307.264
	1214			mead acid (20:3n9)	LC/MS neg	35174		HMDB10378	5312531			1.15	1.42	1.23		0.2915	0.2082	0.6335	0.5042	0.1311	0.3038	0.2844	0.4083		0.8611	0.9943	1.2222		100	100	100		Lipid	Polyunsaturated Fatty Acid (n3 and n6)	100001472	20590-32-3	5650	305.249
	1215			docosatrienoate (22:3n6)*	LC/MS neg	57467						0.82	1.46	1.78		0.0972	0.1223	0.1401	0.2488	0.4756	0.5251	0.037	0.1966		0.8786	0.7229	1.2854		100	67	100		Lipid	Polyunsaturated Fatty Acid (n3 and n6)	100015762		5850	333.28
	1269		Fatty Acid, Branched	15-methylpalmitate (i17:0)	LC/MS neg	38768			17903417			1.09	1.04	0.96		0.9254	0.3985	0.7068	0.5257	0.7882	0.6446	0.9139	0.638		0.9474	1.034	0.9888		83	100	100		Lipid	Fatty Acid, Branched	100002945		5695	269.249
	1272			17-methylstearate (i19:0)	LC/MS neg	38296		HMDB37397	3083779			0.97	0.95	0.98		0.8995	0.3921	0.6988	0.5229	0.6909	0.6209	0.9914	0.6601		1.0588	1.0231	1.0063		100	100	100		Lipid	Fatty Acid, Branched	100002356	2724-59-6	5993	297.28
	1282		Fatty Acid, Dicarboxylate	glutarate (C5-DC)	LC/MS polar	396	C00489	HMDB00661	743			0.31	0.18	0.58		0.1539	0.1559	0.2424	0.3264	0.0583	0.2006	0.4179	0.4657		4.1597	1.287	0.7495		100	100	100		Lipid	Fatty Acid, Dicarboxylate	339	110-94-1	2900	131.035
	1286			2-hydroxyglutarate	LC/MS pos early	52294	C02630	HMDB00606	43			0.97	0.73	0.75		0.4043	0.2539	0.9253	0.5898	0.2317	0.386	0.2677	0.3998		1.3041	1.2637	0.9538		100	100	100		Lipid	Fatty Acid, Dicarboxylate	100002070	40951-21-1	958	166.071
	1291			3-hydroxyadipate*	LC/MS polar	62069		HMDB00345	151913			0.71	0.82	1.15		0.7989	0.3657	0.5381	0.4719	0.9176	0.6832	0.6073	0.5368		1.349	0.9605	1.1026		100	100	100		Lipid	Fatty Acid, Dicarboxylate	100004396		3131	161.046
	1298			suberate (C8-DC)	LC/MS neg	15730	C08278	HMDB00893	10457			0.55	0.52	0.94		0.0671	0.1008	0.059	0.1669	0.0333	0.1606	0.7683	0.5972		1.763	0.9748	0.9206		100	100	100		Lipid	Fatty Acid, Dicarboxylate	100000016	505-48-6	804.3	173.082
	1303			sebacate (C10-DC)	LC/MS neg	32398	C08277	HMDB00792	5192			0.59	0.76	1.29		0.0517	0.0872	0.0166	0.0831	0.2042	0.3718	0.1916	0.3411		1.457	0.8587	1.1105		100	100	100		Lipid	Fatty Acid, Dicarboxylate	100001211	111-20-6	1788	201.113
	1306			dodecanedioate (C12-DC)	LC/MS neg	32388	C02678	HMDB00623	12736			0.82	1.07	1.3		0.5924	0.3147	0.4726	0.4519	0.7916	0.6446	0.3305	0.4242		1.1976	0.9858	1.278		100	100	100		Lipid	Fatty Acid, Dicarboxylate	100001102	693-23-2	2990	229.145
	1307			tetradecanedioate (C14-DC)	LC/MS neg	35669		HMDB00872	13185			0.59	0.94	1.58		0.3428	0.2297	0.1954	0.2925	0.9318	0.6879	0.2241	0.3668		1.3685	0.8124	1.2839		100	100	100		Lipid	Fatty Acid, Dicarboxylate	100001613	821-38-5	4000	257.176
	1308			hexadecanedioate (C16-DC)	LC/MS neg	35678	C19615	HMDB00672	10459			0.56	0.76	1.34		0.2142	0.1757	0.0843	0.2084	0.3451	0.4498	0.396	0.4562		1.4488	0.8177	1.0974		100	100	100		Lipid	Fatty Acid, Dicarboxylate	100001614	505-54-4	4615	285.207
	1312			octadecenedioate (C18:1-DC)*	LC/MS neg	61861						0.47	0.69	1.48		0.0152	0.0611	0.0045	0.0494	0.1701	0.3458	0.0774	0.2436		1.5319	0.7177	1.0609		100	100	100		Lipid	Fatty Acid, Dicarboxylate	100019978		4875	311.223
	1314			eicosanodioate (C20-DC)	LC/MS neg	39831			75502			0.77	0.7	0.9		0.1176	0.1369	0.1484	0.2565	0.0467	0.189	0.5295	0.5094		1.1697	0.9054	0.8147		100	100	83		Lipid	Fatty Acid, Dicarboxylate	100002951	2424-92-2	5200.9	341.27
	1315			docosadioate (C22-DC)	LC/MS neg	39837	C19625		244872			0.92	0.75	0.81		0.2131	0.1756	0.4907	0.459	0.0861	0.235	0.2761	0.4049		1.0821	0.9945	0.8099		83	50	33		Lipid	Fatty Acid, Dicarboxylate	100002952	505-56-6	5291.8	369.301
	1317			3-carboxy-4-methyl-5-pentyl-2-furanpropionate (3-Cmpfp)**	LC/MS neg	61871			194501			0.88	0.97	1.1		0.1841	0.1654	0.0869	0.2113	0.7384	0.6368	0.1566	0.3094		1.0779	0.9463	1.0437		100	100	100		Lipid	Fatty Acid, Dicarboxylate	100020004		4000	267.124
	1354		Fatty Acid, Amino	2-aminooctanoate	LC/MS pos late	43343		HMDB00991	69522			0.88	1.11	1.26		0.6405	0.3261	0.5868	0.4931	0.6959	0.6209	0.3553	0.4367		1.088	0.9549	1.2077		100	100	100		Lipid	Fatty Acid, Amino	100004227	644-90-6	750	160.133
	1355			N-acetyl-2-aminooctanoate*	LC/MS neg	62059		HMDB59745	95555			0.99	1.15	1.17		0.9388	0.4016	0.9884	0.6037	0.7678	0.6387	0.7568	0.5941		1.0157	1.0007	1.1697		100	100	100		Lipid	Fatty Acid, Amino	100020204		3943	200.129
	1366		Fatty Acid Metabolism (also BCAA Metabolism)	butyrylcarnitine (C4)	LC/MS pos early	32412	C02862	HMDB02013	439829			1.11	0.69	0.62		0.2819	0.2042	0.7786	0.5476	0.2222	0.3794	0.1396	0.2995		1.1288	1.2505	0.7808		100	100	100		Lipid	Fatty Acid Metabolism (also BCAA Metabolism)	100001054	25576-40-3	2860	232.154
	1367			butyrylglycine	LC/MS neg	31850		HMDB00808	88412			0.89	0.83	0.94		0.3884	0.2452	0.3488	0.3923	0.1867	0.3576	0.6829	0.5667		1.1595	1.0337	0.9671		100	100	100		Lipid	Fatty Acid Metabolism (also BCAA Metabolism)	100001151	20208-73-5	1470	144.067
	1369			propionylcarnitine (C3)	LC/MS pos early	32452	C03017	HMDB00824	107738			0.63	0.48	0.77		0.057	0.0907	0.1437	0.2516	0.019	0.1239	0.295	0.4119		1.8084	1.1354	0.8752		100	100	100		Lipid	Fatty Acid Metabolism (also BCAA Metabolism)	100001162	17298-37-2	2590	218.139
	1370			propionylglycine	LC/MS neg	31932		HMDB00783	98681			0.51	0.48	0.94		0.0006	0.0111	0.0008	0.0174	0.0004	0.0137	0.7538	0.5941		1.8107	0.9221	0.8697		100	83	100		Lipid	Fatty Acid Metabolism (also BCAA Metabolism)	100001150	21709-90-0	960	130.051
	1372			methylmalonate (MMA)	LC/MS polar	1496	C02170	HMDB00202	487			0.81	0.78	0.96		0.4604	0.2738	0.2939	0.3524	0.278	0.4144	0.9704	0.6527		1.2609	1.0257	0.9814		100	100	100		Lipid	Fatty Acid Metabolism (also BCAA Metabolism)	418	516-05-2	3078.4	117.019
	1377		Fatty Acid Metabolism(Acyl Glycine)	isocaproylglycine	LC/MS neg	61789						0.43	0.44	1.03		0.0743	0.1057	0.0402	0.1289	0.0572	0.1992	0.8552	0.6264		2.2109	0.9423	0.9715		100	100	100		Lipid	Fatty Acid Metabolism(Acyl Glycine)	100019816		2820	172.098
	1380			hexanoylglycine	LC/MS neg	35436		HMDB00701	99463			0.88	1	1.14		0.2724	0.2018	0.1631	0.2632	0.9888	0.6962	0.167	0.3205		1.0518	0.921	1.0536		100	100	100		Lipid	Fatty Acid Metabolism(Acyl Glycine)	100001527	24003-67-6	2900	172.098
	1383			3,4-methylene heptanoylglycine	LC/MS neg	55012						1.32	0.82	0.62		0.154	0.1559	0.2539	0.332	0.3998	0.4764	0.0579	0.2247		1.0988	1.4502	0.9022		100	100	100		Lipid	Fatty Acid Metabolism(Acyl Glycine)	100010861		3818	198.114
	1384			N-octanoylglycine	LC/MS neg	43502		HMDB00832	84290			0.75	0.93	1.24		0.5129	0.2879	0.2781	0.3462	0.8057	0.6446	0.3954	0.4562		1.1019	0.8277	1.0273		100	100	100		Lipid	Fatty Acid Metabolism(Acyl Glycine)	100003940	14246-53-8	4335.4	200.129
	1385			N-palmitoylglycine	LC/MS neg	42092		HMDB13034	151008			1.06	1.09	1.02		0.7297	0.3462	0.5302	0.4719	0.4723	0.5251	0.9257	0.6411		0.9877	1.0483	1.0734		100	100	100		Lipid	Fatty Acid Metabolism(Acyl Glycine)	100003686	2441-41-0	5580	312.254
	1390			2-butenoylglycine	LC/MS neg	61785			6303498			1.04	1.2	1.15		0.503	0.2873	0.7991	0.5555	0.2706	0.4085	0.3902	0.4554		0.876	0.9132	1.0514		100	100	100		Lipid	Fatty Acid Metabolism(Acyl Glycine)	100016110	71428-89-2	1380	142.051
	1393		Fatty Acid Metabolism(Acyl Carnitine)	acetylcarnitine (C2)	LC/MS pos early	32198	C02571	HMDB00201	1			0.93	0.85	0.91		0.0633	0.0969	0.252	0.3307	0.0209	0.1274	0.1851	0.3355		1.0745	0.9949	0.9091		100	100	100		Lipid	Fatty Acid Metabolism(Acyl Carnitine)	100000802	5080-50-2	2282	204.123
	1395			3-hydroxybutyrylcarnitine (1)	LC/MS pos early	43264		HMDB13127	53481617			1.08	0.83	0.77		0.2147	0.1757	0.688	0.5194	0.1952	0.3632	0.0978	0.2566		1.1234	1.2101	0.9347		100	100	100		Lipid	Fatty Acid Metabolism(Acyl Carnitine)	100003926		2400	248.149
	1396			3-hydroxybutyrylcarnitine (2)	LC/MS pos early	52984		HMDB13127				1.45	0.74	0.51		0.2921	0.2082	0.3514	0.3923	0.5163	0.5448	0.1247	0.289		1.3353	1.9368	0.9824		100	100	100		Lipid	Fatty Acid Metabolism(Acyl Carnitine)	100009271		2340	248.149
	1398			hexanoylcarnitine (C6)	LC/MS pos early	32328		HMDB00705	6426853			1.15	1	0.87		0.9798	0.412	0.8782	0.5805	0.9735	0.6945	0.8522	0.6254		0.9637	1.1037	0.9651		100	100	100		Lipid	Fatty Acid Metabolism(Acyl Carnitine)	100000781	6920-35-0	3308	260.186
	1399			octanoylcarnitine (C8)	LC/MS pos late	33936	C02838	HMDB00791	123701			1.21	0.94	0.78		0.813	0.3689	0.6391	0.5042	0.8913	0.6726	0.5461	0.5127		1.0238	1.234	0.9604		100	100	100		Lipid	Fatty Acid Metabolism(Acyl Carnitine)	100001247	3671-77-0	950	288.217
	1401			decanoylcarnitine (C10)	LC/MS pos late	33941		HMDB00651	10245190			0.84	0.87	1.04		0.9153	0.3962	0.6957	0.5228	0.754	0.6386	0.9376	0.643		1.2136	1.0214	1.0598		100	100	100		Lipid	Fatty Acid Metabolism(Acyl Carnitine)	100001251	1492-27-9	1130	316.248
	1403			5-dodecenoylcarnitine (C12:1)	LC/MS pos late	61769						0.76	1	1.32		0.1703	0.1571	0.1129	0.226	0.9293	0.6879	0.0964	0.2565		1.1414	0.8654	1.1402		100	100	100		Lipid	Fatty Acid Metabolism(Acyl Carnitine)	100016069		1135	342.264
	1404			cis-4-decenoylcarnitine (C10:1)	LC/MS pos late	38178						0.81	1.02	1.26		0.2601	0.198	0.1541	0.2575	0.9785	0.6945	0.1613	0.314		1.0168	0.8233	1.0367		100	100	100		Lipid	Fatty Acid Metabolism(Acyl Carnitine)	100002259	98930-66-6	1057	314.233
	1405			laurylcarnitine (C12)	LC/MS pos late	34534		HMDB02250	10427569			0.91	1.05	1.16		0.4964	0.2873	0.4827	0.4542	0.6352	0.6015	0.2472	0.3844		1.0525	0.9559	1.1048		100	100	100		Lipid	Fatty Acid Metabolism(Acyl Carnitine)	100001392	25518-54-1	1235	344.28
	1406			myristoylcarnitine (C14)	LC/MS pos late	33952		HMDB05066	6426854			0.89	1.14	1.28		0.1147	0.1348	0.2749	0.3462	0.2855	0.4198	0.0406	0.2021		0.979	0.8718	1.1171		100	100	100		Lipid	Fatty Acid Metabolism(Acyl Carnitine)	100001270	18822-89-4	1350	372.311
	1408			palmitoylcarnitine (C16)	LC/MS pos late	44681	C02990	HMDB00222	461			0.87	1.14	1.3		0.1165	0.1363	0.2155	0.3073	0.368	0.4597	0.0421	0.2046		1.0053	0.879	1.1411		100	100	100		Lipid	Fatty Acid Metabolism(Acyl Carnitine)	100000776	6865-14-1	1425	400.342
	1409			palmitoleoylcarnitine (C16:1)*	LC/MS pos late	53223			71464547			0.85	1.11	1.3		0.072	0.1045	0.119	0.2331	0.4311	0.4952	0.0264	0.1893		1.0315	0.8752	1.1401		100	100	100		Lipid	Fatty Acid Metabolism(Acyl Carnitine)	100009406		1357	398.326
	1410			stearoylcarnitine (C18)	LC/MS pos late	34409		HMDB00848	6426855			0.81	0.93	1.14		0.2955	0.2092	0.1269	0.2418	0.5284	0.5504	0.3471	0.4356		1.1996	0.977	1.1144		100	100	100		Lipid	Fatty Acid Metabolism(Acyl Carnitine)	100001391	18822-91-8	1485	428.373
	1411			linoleoylcarnitine (C18:2)*	LC/MS pos late	46223		HMDB06469	6450015			0.73	0.91	1.23		0.035	0.0798	0.0131	0.0781	0.455	0.5127	0.0588	0.2247		1.1577	0.849	1.0483		100	100	100		Lipid	Fatty Acid Metabolism(Acyl Carnitine)	100003151	36816-10-1	1430	424.342
	1412			linolenoylcarnitine (C18:3)*	LC/MS pos late	57511						0.81	1.02	1.26		0.4357	0.2649	0.2775	0.3462	0.9677	0.6945	0.261	0.3964		1.0639	0.8617	1.0889		100	100	100		Lipid	Fatty Acid Metabolism(Acyl Carnitine)	100015831		1310	422.326
	1414			oleoylcarnitine (C18:1)	LC/MS pos late	35160		HMDB05065	6441392			0.75	1	1.33		0.0298	0.0747	0.018	0.0849	0.9009	0.6744	0.0232	0.1893		1.0255	0.7703	1.025		100	100	100		Lipid	Fatty Acid Metabolism(Acyl Carnitine)	100001501	38677-66-6	1423	426.358
	1416			myristoleoylcarnitine (C14:1)*	LC/MS pos late	48182			90659872			0.71	0.92	1.29		0.0108	0.0505	0.0037	0.0444	0.3179	0.4398	0.0296	0.1893		1.2169	0.8662	1.1205		100	100	100		Lipid	Fatty Acid Metabolism(Acyl Carnitine)	100006051	889848-55-9	1316	370.295
	1417			suberoylcarnitine (C8-DC)	LC/MS pos early	52990						0.78	0.79	1.02		0.276	0.202	0.2228	0.3128	0.1347	0.3095	0.7614	0.5954		1.1224	0.8716	0.8917		100	100	83		Lipid	Fatty Acid Metabolism(Acyl Carnitine)	100006627		2964	318.191
	1419			adipoylcarnitine (C6-DC)	LC/MS pos early	52988		HMDB61677	71296139			0.67	0.56	0.84		0.1471	0.1555	0.2031	0.2991	0.0571	0.1992	0.4767	0.4887		1.5758	1.0494	0.8799		100	100	100		Lipid	Fatty Acid Metabolism(Acyl Carnitine)	100006614		2558	290.16
	1425			octadecenedioylcarnitine (C18:1-DC)*	LC/MS pos late	61865						0.8	0.99	1.24		0.3508	0.2308	0.2009	0.2971	0.9357	0.6879	0.2285	0.3707		1.0149	0.8102	1.0026		83	83	83		Lipid	Fatty Acid Metabolism(Acyl Carnitine)	100005996	251981-06-3	1180	456.332
	1427			arachidonoylcarnitine (C20:4)	LC/MS pos late	57518						0.61	0.75	1.24		0.054	0.0876	0.0186	0.0863	0.1144	0.2836	0.3509	0.4367		1.3767	0.8353	1.0341		100	100	100		Lipid	Fatty Acid Metabolism(Acyl Carnitine)	100015837		1353	448.342
	1428			adrenoylcarnitine (C22:4)*	LC/MS pos late	57528						0.71	0.58	0.82		0.1775	0.1607	0.1009	0.2185	0.1168	0.2866	0.9344	0.643		0.9878	0.6973	0.5733		83	33	50		Lipid	Fatty Acid Metabolism(Acyl Carnitine)	100015850		1415	476.373
	1429			behenoylcarnitine (C22)*	LC/MS pos late	57514						0.86	1.04	1.2		0.5948	0.3149	0.4068	0.4162	0.9343	0.6879	0.3634	0.4426		0.8511	0.732	0.8811		67	33	67		Lipid	Fatty Acid Metabolism(Acyl Carnitine)	100015832		1561	484.436
	1430			dihomo-linolenoylcarnitine (20:3n3 or 6)*	LC/MS pos late	57521						0.78	0.8	1.03		0.1785	0.161	0.1191	0.2331	0.1002	0.258	0.9223	0.6409		1.1907	0.932	0.9573		100	100	100		Lipid	Fatty Acid Metabolism(Acyl Carnitine)	100015840		1392	450.358
	1431			dihomo-linoleoylcarnitine (C20:2)*	LC/MS pos late	57520						0.62	0.77	1.23		0.0152	0.0611	0.0044	0.0494	0.085	0.2349	0.1546	0.3094		1.2924	0.8028	0.989		100	100	100		Lipid	Fatty Acid Metabolism(Acyl Carnitine)	100015839		1436	452.373
	1432			eicosenoylcarnitine (C20:1)*	LC/MS pos late	57519						0.82	0.75	0.92		0.2754	0.202	0.1532	0.2575	0.1834	0.3553	0.9142	0.638		1.2226	0.9967	0.916		100	100	100		Lipid	Fatty Acid Metabolism(Acyl Carnitine)	100015838		1484	454.389
	1437			docosahexaenoylcarnitine (C22:6)*	LC/MS pos late	57523						0.45	0.67	1.51		0.1247	0.1419	0.0456	0.1389	0.2195	0.3794	0.3834	0.4554		1.0449	0.4651	0.7011		83	33	50		Lipid	Fatty Acid Metabolism(Acyl Carnitine)	100015845		1349	472.342
	1439			lignoceroylcarnitine (C24)*	LC/MS pos late	57515						1.25	0.99	0.79		0.0868	0.1167	0.0645	0.177	0.8728	0.666	0.0475	0.2215		0.931	1.1668	0.9228		83	100	67		Lipid	Fatty Acid Metabolism(Acyl Carnitine)	100015834		1603	512.467
	1440			margaroylcarnitine (C17)*	LC/MS pos late	57512		HMDB06210				0.8	1	1.25		0.2576	0.1966	0.1333	0.2451	0.8365	0.6521	0.1886	0.3373		1.0586	0.8478	1.0628		100	100	100		Lipid	Fatty Acid Metabolism(Acyl Carnitine)	100004054	106182-29-0	1424	414.358
	1444			pentadecanoylcarnitine (C15)*	LC/MS pos late	57522						0.63	0.89	1.41		0.0021	0.019	0.0007	0.0159	0.2388	0.3886	0.0086	0.1474		1.2114	0.7608	1.0765		100	100	100		Lipid	Fatty Acid Metabolism(Acyl Carnitine)	100015842		1362	386.326
	1449		Carnitine Metabolism	deoxycarnitine	LC/MS pos early	36747	C01181	HMDB01161	134			1.16	0.86	0.75		0.2072	0.173	0.4573	0.4456	0.2893	0.4212	0.0824	0.2489		1.09	1.2593	0.9416		100	100	100		Lipid	Carnitine Metabolism	100001662	6249-56-5	2052	146.118
	1450			carnitine	LC/MS pos early	15500	C00318	HMDB00062	10917			1.22	0.93	0.77		0.1652	0.1562	0.1543	0.2575	0.6819	0.6175	0.0743	0.2422		1.0417	1.2658	0.9726		100	100	100		Lipid	Carnitine Metabolism	100000007	461-05-2	1978	162.112
	1455		Ketone Bodies	3-hydroxybutyrate (BHBA)	LC/MS polar	542	C01089	HMDB00357	441			0.96	0.97	1.02		0.9329	0.4011	0.7232	0.5288	0.7954	0.6446	0.9241	0.641		1.0459	0.9994	1.0156		100	100	100		Lipid	Ketone Bodies	254	625-72-9	1444	103.04
	1458		Fatty Acid Metabolism (Acyl Choline)	palmitoylcholine	LC/MS pos late	52944			151731			0.89	1.29	1.45		0.4313	0.2635	0.8315	0.5672	0.3185	0.4398	0.231	0.3707		0.922	0.8202	1.1883		67	67	83		Lipid	Fatty Acid Metabolism (Acyl Choline)	100009233		1482	342.337
	1462			linoleoylcholine*	LC/MS pos late	57463						0.81	1.21	1.49		0.7128	0.344	0.5789	0.4918	0.8108	0.6446	0.4301	0.4672		0.7734	0.6289	0.9342		50	50	50		Lipid	Fatty Acid Metabolism (Acyl Choline)	100015760		1388	366.337
	1473		Fatty Acid, Monohydroxy	2-hydroxydecanoate	LC/MS neg	42489			21488			0.79	0.99	1.26		0.1555	0.1562	0.0846	0.2084	0.8885	0.6726	0.109	0.2712		1.1386	0.8994	1.1294		100	100	100		Lipid	Fatty Acid, Monohydroxy	100004089	5393-81-7	4840	187.134
	1478			2-hydroxypalmitate	LC/MS neg	35675		HMDB31057	92836			1.01	1.11	1.1		0.3505	0.2308	0.9051	0.5846	0.1953	0.3632	0.2361	0.3744		0.9583	0.9693	1.0678		100	100	100		Lipid	Fatty Acid, Monohydroxy	100001579	764-67-0	5511.2	271.228
	1480			2-hydroxystearate	LC/MS neg	17945	C03045		69417			1.03	1.08	1.05		0.8454	0.3779	0.7184	0.5268	0.5734	0.5703	0.8379	0.6194		0.9737	1.0047	1.0507		100	100	100		Lipid	Fatty Acid, Monohydroxy	1239	629-22-1	5695	299.259
	1486			3-hydroxyhexanoate	LC/MS neg	53230			151492			1	0.92	0.92		0.7404	0.3505	0.9359	0.5898	0.4853	0.5293	0.5359	0.5094		1.0466	1.0478	0.9674		100	100	100		Lipid	Fatty Acid, Monohydroxy	100006367	10191-24-9	1725	131.071
	1487			3-hydroxyoctanoate	LC/MS neg	22001		HMDB01954	26613			0.92	0.84	0.91		0.6466	0.328	0.5472	0.4764	0.3663	0.4597	0.7566	0.5941		1.1259	1.0414	0.9505		100	100	100		Lipid	Fatty Acid, Monohydroxy	100000773	88930-08-9	3446	159.103
	1488			3-hydroxydecanoate	LC/MS neg	22053		HMDB02203	26612			1	0.97	0.97		0.9787	0.412	0.8478	0.5719	0.9713	0.6945	0.8761	0.6343		1.1001	1.1023	1.0712		100	100	100		Lipid	Fatty Acid, Monohydroxy	100000997	5561-87-5	4634.7	187.134
	1489			3-hydroxyoleate*	LC/MS neg	61843						0.73	0.97	1.33		0.4851	0.2851	0.2862	0.3474	0.9362	0.6879	0.3219	0.4242		1.0643	0.7756	1.0323		100	100	100		Lipid	Fatty Acid, Monohydroxy	100019966		5508	297.244
	1490			3-hydroxysebacate	LC/MS neg	31943		HMDB00350	3017884			0.54	0.89	1.64		0.0184	0.0674	0.0083	0.0653	0.6069	0.5936	0.0239	0.1893		1.4361	0.7795	1.2802		100	100	100		Lipid	Fatty Acid, Monohydroxy	100001145	73141-46-5	1282	217.108
	1491			3-hydroxylaurate	LC/MS neg	32457		HMDB00387	94216			0.97	1.14	1.17		0.6585	0.3308	0.6383	0.5042	0.6614	0.6114	0.3687	0.4463		1.1613	1.1313	1.3212		100	100	100		Lipid	Fatty Acid, Monohydroxy	100001112	53941-38-1	5175	215.165
	1493			3-hydroxymyristate	LC/MS neg	21158			16064			0.97	1.17	1.21		0.6347	0.3246	0.7283	0.5297	0.5552	0.5575	0.3535	0.4367		1.0116	0.9802	1.1876		100	100	100		Lipid	Fatty Acid, Monohydroxy	100000882	3422-31-9	5335	243.197
	1494			3-hydroxypalmitate	LC/MS neg	27503		HMDB10734	301590			1.02	0.93	0.91		0.9383	0.4016	0.9023	0.5846	0.8228	0.6475	0.7292	0.5878		1.0284	1.0468	0.9554		100	100	83		Lipid	Fatty Acid, Monohydroxy	100000983	928-17-6	5476	271.228
	1496			5-hydroxyhexanoate	LC/MS neg	31938		HMDB00525	170748			1.08	1.02	0.94		0.9009	0.3921	0.6663	0.5113	0.9157	0.683	0.7444	0.5912		0.9503	1.0268	0.968		100	100	100		Lipid	Fatty Acid, Monohydroxy	100001148	44843-89-2	1267	131.071
	1503			16-hydroxypalmitate	LC/MS neg	39609	C18218	HMDB06294	10466			1.03	1.27	1.23		0.281	0.2042	0.9087	0.5846	0.1556	0.3292	0.1882	0.3373		0.957	0.9899	1.2194		100	100	100		Lipid	Fatty Acid, Monohydroxy	100002953	506-13-8	5236.2	271.228
	1507			13-HODE + 9-HODE	LC/MS neg	37752			43013			1.06	1.42	1.34		0.6341	0.3246	0.8758	0.5805	0.3785	0.463	0.4657	0.4847		1.0117	1.0716	1.44		100	100	100		Lipid	Fatty Acid, Monohydroxy	100002196		5275	295.228
	1510			14-HDoHE/17-HDoHE	LC/MS neg	53034						0.9	1.29	1.43		0.3218	0.2205	0.5677	0.4888	0.3499	0.4506	0.1422	0.3015		1.0584	0.9559	1.3643		100	100	100		Lipid	Fatty Acid, Monohydroxy	100009278		5296	343.228
	1522			3-hydroxystearate	LC/MS neg	52938			5282907			0.86	0.94	1.09		0.6618	0.3308	0.3871	0.41	0.8124	0.6446	0.526	0.5094		1.0082	0.8711	0.9457		100	100	100		Lipid	Fatty Acid, Monohydroxy	100008933	45261-96-9	5674	299.259
	1531		Fatty Acid, Dihydroxy	12,13-DiHOME	LC/MS neg	38395	C14829	HMDB04705	10236635			0.87	1.37	1.57		0.1874	0.1669	0.6859	0.5194	0.1724	0.3487	0.0848	0.2489		0.8587	0.7478	1.1724		100	83	100		Lipid	Fatty Acid, Dihydroxy	62	263399-35-5	5137	313.238
	1532			9,10-DiHOME	LC/MS neg	38399	C14828	HMDB04704	9966640			0.94	1.27	1.36		0.3473	0.2308	0.8104	0.5593	0.2619	0.4037	0.1789	0.33		0.8398	0.7863	1.0656		83	83	100		Lipid	Fatty Acid, Dihydroxy	179	263399-34-4	5180	313.238
	1611		Eicosanoid	12-HETE	LC/MS neg	37536		HMDB06111	5312983			1.1	1.33	1.2		0.3341	0.2271	0.8535	0.5746	0.1776	0.3507	0.2388	0.3773		0.9302	1.0252	1.2326		100	100	100		Lipid	Eicosanoid	100002167	71030-37-0;73837-14-6	5326	319.228
	1617			12-HHTrE	LC/MS neg	57393	C20388	HMDB12535	5283141			1.01	1.17	1.15		0.7193	0.3456	0.7242	0.5288	0.4257	0.492	0.6527	0.5566		1.0071	1.0208	1.1761		100	100	100		Lipid	Eicosanoid	1261	54397-84-1	5175	279.197
	1624		Endocannabinoid	oleoyl ethanolamide	LC/MS neg	38102		HMDB02088	5283454			0.88	1.12	1.28		0.1735	0.1588	0.3263	0.381	0.3466	0.4498	0.0656	0.2309		0.988	0.8668	1.1086		100	100	100		Lipid	Endocannabinoid	1137	11-58-0;111-58-0	6450	324.291
	1627			palmitoyl ethanolamide	LC/MS neg	38165	C16512	HMDB02100	4671			1.24	1.12	0.9		0.3204	0.2205	0.1391	0.2488	0.515	0.5448	0.3847	0.4554		0.896	1.1067	1.0007		100	100	100		Lipid	Endocannabinoid	1489	544-31-0	6300	298.275
	1636			N-oleoyltaurine	LC/MS neg	39732			6437033			0.51	0.76	1.49		0.0824	0.1123	0.0279	0.1054	0.2312	0.386	0.2543	0.3892		1.0082	0.5136	0.7627		83	50	50		Lipid	Endocannabinoid	100003119	52514-04-2	5610	388.253
	1637			N-stearoyltaurine	LC/MS neg	39730			168274			0.72	0.72	1		0.0925	0.1197	0.0606	0.1687	0.0561	0.1992	0.9678	0.6527		1.0909	0.7845	0.7862		100	83	67		Lipid	Endocannabinoid	100003240	63155-80-6	5782	390.268
	1638			N-palmitoyltaurine	LC/MS neg	39835						0.99	0.89	0.9		0.6003	0.3159	0.8433	0.5712	0.3458	0.4498	0.452	0.4766		1.0723	1.057	0.949		100	100	100		Lipid	Endocannabinoid	100003239	83982-06-3	5560	362.237
	1640			N-linoleoyltaurine*	LC/MS neg	61826						0.75	0.88	1.17		0.2561	0.1966	0.1056	0.2198	0.3388	0.4498	0.4741	0.4887		1.1281	0.8441	0.989		100	83	83		Lipid	Endocannabinoid	100005814		5505	386.237
	1657		Inositol Metabolism	myo-inositol	LC/MS polar	1124	C00137	HMDB00211	892			2.11	0.67	0.32		0.0459	0.0867	0.0738	0.1956	0.462	0.5161	0.0172	0.1817		1.0715	2.2659	0.7209		100	100	100		Lipid	Inositol Metabolism	363	87-89-8	3506.3	225.062
	1686		Phospholipid Metabolism	choline	LC/MS pos early	15506	C00114	HMDB00097	305			1.24	0.81	0.66		0.1077	0.1294	0.1988	0.2951	0.372	0.4604	0.0388	0.2015		1.1062	1.3707	0.9002		100	100	100		Lipid	Phospholipid Metabolism	1256	67-48-1	1961	104.107
	1687			choline phosphate	LC/MS pos early	34396	C00588	HMDB01565	1014			15.06	4.94	0.33		0.0006	0.0111	0.0002	0.0071	0.0065	0.0893	0.0908	0.2508		0.2324	3.4994	1.1477		50	100	100		Lipid	Phospholipid Metabolism	267	72556-74-2	700	184.073
	1690			glycerophosphorylcholine (GPC)	LC/MS pos early	15990	C00670	HMDB00086	71920			1.6	1.03	0.65		0.052	0.0872	0.03	0.1089	0.8936	0.6726	0.0391	0.2015		0.9241	1.4748	0.9515		100	100	100		Lipid	Phospholipid Metabolism	100000269	28319-77-9	672	258.11
	1692			phosphoethanolamine	LC/MS neg	1600	C00346	HMDB00224	1015			8.07	3.61	0.45		1.3909e-05	0.0007	3.8261e-06	0.0006	0.0003	0.0112	0.0292	0.1893		0.24	1.9362	0.8673		50	100	100		Lipid	Phospholipid Metabolism	1026	1071-23-4	638	140.012
	1694			glycerophosphoethanolamine	LC/MS polar	37455	C01233	HMDB00114	123874			1.62	1.07	0.66		0.0471	0.0869	0.0206	0.0899	0.6278	0.6015	0.0538	0.2247		0.9374	1.5141	0.9989		100	100	100		Lipid	Phospholipid Metabolism	100001620	33049-08-0	3075	214.049
	1696			glycerophosphoinositol*	LC/MS polar	47155			167572			1.37	0.99	0.72		0.1493	0.1555	0.0917	0.2185	0.9997	0.6982	0.0917	0.2508		0.9695	1.3313	0.9565		100	100	100		Lipid	Phospholipid Metabolism	100001621	16824-65-0	3850	333.059
	1697			trimethylamine N-oxide	LC/MS pos early	40406	C01104	HMDB00925	1145			0.72	0.89	1.25		0.2164	0.176	0.1013	0.2185	0.7231	0.6326	0.1865	0.3364		1.1722	0.8386	1.0479		100	100	100		Lipid	Phospholipid Metabolism	100003397	1184-78-7	2100	76.0757
	1715		Phosphatidylcholine (PC)	1-myristoyl-2-palmitoyl-GPC (14:0/16:0)	LC/MS pos late	19258		HMDB07869	129657			1.28	1.22	0.96		0.0047	0.0314	0.0021	0.0311	0.0078	0.0949	0.539	0.5094		0.8842	1.1292	1.079		100	100	100		Lipid	Phosphatidylcholine (PC)	100000672	69525-80-0	2147	706.538
	1719			1-myristoyl-2-arachidonoyl-GPC (14:0/20:4)*	LC/MS pos late	53195		HMDB07883				1.17	1.28	1.09		0.1196	0.138	0.1643	0.2632	0.0462	0.189	0.4884	0.4913		0.8835	1.0349	1.1286		100	100	100		Lipid	Phosphatidylcholine (PC)	100009139		1914	754.538
	1729			1,2-dipalmitoyl-GPC (16:0/16:0)	LC/MS pos late	19130		HMDB00564	452110			1.12	1.03	0.92		0.1648	0.1562	0.0693	0.1888	0.5935	0.5861	0.1787	0.33		0.9866	1.1047	1.017		100	100	100		Lipid	Phosphatidylcholine (PC)	100000657	63-89-8	2365	734.569
	1730			1-palmitoyl-2-palmitoleoyl-GPC (16:0/16:1)*	LC/MS pos late	52470		HMDB07969				1.07	1.16	1.08		0.0331	0.0783	0.2125	0.3066	0.0103	0.0949	0.1242	0.289		0.9298	0.9949	1.0754		100	100	100		Lipid	Phosphatidylcholine (PC)	100008984		2160	732.554
	1731			1-palmitoyl-2-stearoyl-GPC (16:0/18:0)	LC/MS pos late	52616		HMDB07970				1.08	0.88	0.82		0.0273	0.0744	0.2754	0.3462	0.08	0.2272	0.0088	0.1474		1.0315	1.1104	0.9092		100	100	100		Lipid	Phosphatidylcholine (PC)	100008921	59403-51-9	2653	762.601
	1733			1-palmitoyl-2-oleoyl-GPC (16:0/18:1)	LC/MS pos late	52461		HMDB07972	6436017			0.93	0.95	1.03		0.2043	0.1713	0.083	0.2084	0.2545	0.3986	0.5115	0.5012		1.0371	0.9644	0.9887		100	100	100		Lipid	Phosphatidylcholine (PC)	1539	26853-31-6;26853-31-6	2358	760.585
	1736			1-palmitoyl-2-linoleoyl-GPC (16:0/18:2)	LC/MS pos late	42446		HMDB07973	5287971			1.03	1	0.97		0.8245	0.3726	0.6065	0.4976	0.9769	0.6945	0.5867	0.5281		0.997	1.0227	0.9963		100	100	100		Lipid	Phosphatidylcholine (PC)	1537	40811-94-7	2160	758.569
	1739			1-palmitoyl-2-gamma-linolenoyl-GPC (16:0/18:3n6)*	LC/MS pos late	54812		HMDB07974				0.96	0.92	0.96		0.5713	0.3077	0.6241	0.5042	0.2983	0.4268	0.5725	0.5236		1.0443	0.9987	0.9577		100	100	100		Lipid	Phosphatidylcholine (PC)	100009154		2034	756.554
	1742			1-palmitoyl-2-dihomo-linolenoyl-GPC (16:0/20:3n3 or 6)*	LC/MS pos late	52454						1.09	0.95	0.88		0.3183	0.2205	0.443	0.4434	0.4449	0.5044	0.1366	0.2995		0.9783	1.0618	0.9309		100	100	100		Lipid	Phosphatidylcholine (PC)	100008985		2199	784.585
	1746			1-palmitoyl-2-arachidonoyl-GPC (16:0/20:4n6)	LC/MS pos late	52462		HMDB07982	10747814			1.03	0.96	0.93		0.3405	0.2294	0.571	0.4901	0.3673	0.4597	0.1521	0.3088		1.0284	1.0575	0.9868		100	100	100		Lipid	Phosphatidylcholine (PC)	100008914	35418-58-7	2091	782.569
	1752			1-palmitoyl-2-docosahexaenoyl-GPC (16:0/22:6)	LC/MS pos late	52610		HMDB07991	6441886			1.03	0.98	0.95		0.6233	0.3214	0.5798	0.4918	0.6816	0.6175	0.3406	0.4322		0.9903	1.0214	0.9694		100	100	100		Lipid	Phosphatidylcholine (PC)	100008915	59403-54-2	2023	806.569
	1757			1-palmitoleoyl-2-linoleoyl-GPC (16:1/18:2)*	LC/MS pos late	52683		HMDB08006				1.04	1.13	1.09		0.272	0.2018	0.5732	0.4905	0.1176	0.2868	0.2953	0.4119		0.9515	0.9889	1.0788		100	100	100		Lipid	Phosphatidylcholine (PC)	100009075		2003	756.554
	1758			1-palmitoleoyl-2-linolenoyl-GPC (16:1/18:3)*	LC/MS pos late	53180		HMDB08008				1.21	1.27	1.05		0.1046	0.1272	0.1171	0.2317	0.0438	0.1871	0.5981	0.5328		0.8409	1.0163	1.0717		100	100	100		Lipid	Phosphatidylcholine (PC)	100009345		1850	754.538
	1767			1,2-distearoyl-GPC (18:0/18:0)	LC/MS pos late	19132		HMDB08036	94190			1.27	0.97	0.76		0.0527	0.0872	0.0399	0.1289	0.8884	0.6726	0.0302	0.1893		0.9041	1.1523	0.8782		100	100	100		Lipid	Phosphatidylcholine (PC)	100000660	816-94-4	2950	790.632
	1768			1-stearoyl-2-oleoyl-GPC (18:0/18:1)	LC/MS pos late	52438		HMDB08038				0.86	0.87	1.01		0.0449	0.0867	0.0261	0.1017	0.0343	0.1636	0.89	0.6377		1.1282	0.9699	0.9785		100	100	100		Lipid	Phosphatidylcholine (PC)	100008904	56421-10-4	2644	788.616
	1771			1-stearoyl-2-linoleoyl-GPC (18:0/18:2)*	LC/MS pos late	52452		HMDB08039				1.06	0.95	0.9		0.0283	0.0747	0.1114	0.226	0.2062	0.3718	0.0087	0.1474		1.0137	1.0784	0.9666		100	100	100		Lipid	Phosphatidylcholine (PC)	100008980		2380	786.601
	1779			1-stearoyl-2-arachidonoyl-GPC (18:0/20:4)	LC/MS pos late	42450		HMDB08048	16219824			0.99	0.96	0.96		0.5119	0.2879	0.8696	0.5805	0.2894	0.4212	0.3665	0.4449		1.0174	1.0109	0.9741		100	100	100		Lipid	Phosphatidylcholine (PC)	100001869	35418-59-8	2300	810.601
	1785			1-stearoyl-2-docosahexaenoyl-GPC (18:0/22:6)	LC/MS pos late	52611		HMDB08057				1.04	0.96	0.92		0.1633	0.1562	0.3357	0.3876	0.3192	0.4398	0.0611	0.2287		1.0016	1.046	0.9591		100	100	100		Lipid	Phosphatidylcholine (PC)	100008916	59403-52-0	2197	834.601
	1792			1-oleoyl-2-linoleoyl-GPC (18:1/18:2)*	LC/MS pos late	52453						1.01	0.88	0.87		0.7267	0.3462	0.7104	0.5268	0.6743	0.6159	0.4322	0.4672		1.004	1.0184	0.8821		83	100	100		Lipid	Phosphatidylcholine (PC)	100008981		2165	784.585
	1802			1-oleoyl-2-docosahexaenoyl-GPC (18:1/22:6)*	LC/MS pos late	52697		HMDB08123				0.88	0.87	0.98		0.0091	0.0468	0.0115	0.0743	0.0045	0.0697	0.6557	0.5566		1.1063	0.9785	0.9616		100	100	100		Lipid	Phosphatidylcholine (PC)	100009130		2011	832.585
	1803			1,2-dilinoleoyl-GPC (18:2/18:2)	LC/MS pos late	52603		HMDB08138	5288075			0.88	0.83	0.94		0.0281	0.0747	0.0757	0.1964	0.0092	0.0949	0.2975	0.4119		1.0842	0.9583	0.8993		100	100	100		Lipid	Phosphatidylcholine (PC)	100008903	998-06-1	2006	782.569
	1804			1-linoleoyl-2-linolenoyl-GPC (18:2/18:3)*	LC/MS pos late	53176		HMDB08141				1.1	0.97	0.88		0.3114	0.2176	0.2449	0.3277	0.7786	0.642	0.1552	0.3094		0.9994	1.0973	0.9701		100	100	100		Lipid	Phosphatidylcholine (PC)	100009343		1939	780.554
	1807			1-linoleoyl-2-arachidonoyl-GPC (18:2/20:4n6)*	LC/MS pos late	52710		HMDB08147				0.84	0.81	0.96		0.0137	0.0587	0.0245	0.0986	0.0054	0.08	0.4661	0.4847		1.1803	0.9955	0.9535		100	100	100		Lipid	Phosphatidylcholine (PC)	100009131		1969	806.569
	1849		Phosphatidylethanolamine (PE)	1-palmitoyl-2-oleoyl-GPE (16:0/18:1)	LC/MS pos late	19263		HMDB05320	5283496			1.15	1.03	0.89		0.8708	0.3837	0.6051	0.4976	0.808	0.6446	0.7827	0.599		1.0617	1.2256	1.0911		100	100	100		Lipid	Phosphatidylethanolamine (PE)	1526	26662-94-2	2509	718.538
	1850			1-palmitoyl-2-linoleoyl-GPE (16:0/18:2)	LC/MS pos late	42449		HMDB05322	9546747			0.85	1.18	1.38		0.0324	0.0774	0.1977	0.2947	0.1311	0.3038	0.01	0.1474		0.9813	0.8386	1.1594		100	100	100		Lipid	Phosphatidylethanolamine (PE)	100001870		2275	716.522
	1853			1-palmitoyl-2-arachidonoyl-GPE (16:0/20:4)*	LC/MS pos late	52464		HMDB05323	9546800			0.95	1.21	1.27		0.0463	0.0867	0.5309	0.4719	0.0638	0.2093	0.0185	0.1817		1.0027	0.954	1.2105		100	100	100		Lipid	Phosphatidylethanolamine (PE)	100008990		2198	740.522
	1855			1-palmitoyl-2-docosahexaenoyl-GPE (16:0/22:6)*	LC/MS pos late	52465		HMDB05324	9546799			0.87	1.07	1.23		0.0746	0.1057	0.1243	0.2398	0.4261	0.492	0.0272	0.1893		1.0336	0.9034	1.1091		100	100	100		Lipid	Phosphatidylethanolamine (PE)	100008991		2119	764.522
	1862			1-stearoyl-2-oleoyl-GPE (18:0/18:1)	LC/MS pos late	42448		HMDB08993				1.27	0.63	0.5		0.4624	0.2738	0.4588	0.4456	0.6203	0.6011	0.2248	0.3668		0.8408	1.0675	0.5312		50	83	50		Lipid	Phosphatidylethanolamine (PE)	100001856		2858	746.569
	1865			1-stearoyl-2-linoleoyl-GPE (18:0/18:2)*	LC/MS pos late	52446		HMDB08994	9546749			1.07	0.94	0.87		0.7445	0.3511	0.7395	0.5325	0.6697	0.6133	0.4511	0.4766		1.0402	1.1157	0.9736		100	100	100		Lipid	Phosphatidylethanolamine (PE)	100008976		2522	744.554
	1870			1-stearoyl-2-arachidonoyl-GPE (18:0/20:4)	LC/MS pos late	52447		HMDB09003	5289133			1.01	1.1	1.09		0.5104	0.2879	0.9788	0.6009	0.3145	0.4392	0.3269	0.4242		1.0189	1.0272	1.1205		100	100	100		Lipid	Phosphatidylethanolamine (PE)	100008977		2424	768.554
	1874			1-stearoyl-2-docosahexaenoyl-GPE (18:0/22:6)*	LC/MS pos late	52466		HMDB05334	9546798			1.31	1.22	0.93		0.041	0.0834	0.0174	0.084	0.0511	0.1955	0.5885	0.5285		0.893	1.1727	1.0919		100	100	100		Lipid	Phosphatidylethanolamine (PE)	100008992		2317	792.554
	1876			1-oleoyl-2-linoleoyl-GPE (18:1/18:2)*	LC/MS pos late	52687		HMDB05349	9546753			0.91	0.91	1		0.8846	0.3877	0.631	0.5042	0.7561	0.6386	0.8642	0.6317		1.0637	0.9653	0.9636		83	100	100		Lipid	Phosphatidylethanolamine (PE)	100009078		2270	742.538
	1882			1-oleoyl-2-docosahexaenoyl-GPE (18:1/22:6)*	LC/MS pos late	53209						0.94	1.1	1.17		0.388	0.2452	0.6034	0.4976	0.3949	0.4733	0.1799	0.33		0.942	0.887	1.035		100	100	100		Lipid	Phosphatidylethanolamine (PE)	100009220		2119	790.538
	1885			1-linoleoyl-2-arachidonoyl-GPE (18:2/20:4)*	LC/MS pos late	53189		HMDB09102				1.09	1.1	1.01		0.951	0.4053	0.8552	0.5747	0.7563	0.6386	0.8979	0.638		0.8505	0.9241	0.9371		67	83	83		Lipid	Phosphatidylethanolamine (PE)	100009222		2030	764.522
	1948		Phosphatidylinositol (PI)	1-palmitoyl-2-oleoyl-GPI (16:0/18:1)*	LC/MS pos late	52669		HMDB09783				0.83	0.49	0.59		0.2017	0.1696	0.5258	0.4706	0.0824	0.231	0.2444	0.3815		0.9381	0.7832	0.4633		83	83	50		Lipid	Phosphatidylinositol (PI)	100009066		3140	854.575
	1950			1-palmitoyl-2-linoleoyl-GPI (16:0/18:2)	LC/MS pos late	52450		HMDB09784				1.07	0.73	0.68		0.0052	0.0331	0.4809	0.4542	0.0097	0.0949	0.0022	0.1155		0.9716	1.035	0.7071		100	100	100		Lipid	Phosphatidylinositol (PI)	1528		2730	852.56
	1952			1-palmitoyl-2-arachidonoyl-GPI (16:0/20:4)*	LC/MS pos late	52467		HMDB09789				1.1	1.01	0.93		0.2968	0.2092	0.1487	0.2565	0.7895	0.6446	0.2302	0.3707		0.9471	1.0371	0.9602		100	100	100		Lipid	Phosphatidylinositol (PI)	100008993		2567	876.56
	1956			1-stearoyl-2-linoleoyl-GPI (18:0/18:2)	LC/MS pos late	52468		HMDB09809				1.02	0.64	0.63		0.0008	0.0111	0.8122	0.5593	0.0009	0.0201	0.0006	0.0996		1.1408	1.1621	0.7283		100	100	100		Lipid	Phosphatidylinositol (PI)	100008994		3185	880.591
	1967			1-stearoyl-2-arachidonoyl-GPI (18:0/20:4)	LC/MS pos late	52449		HMDB09815				1	0.96	0.96		0.7272	0.3462	0.9085	0.5846	0.5364	0.554	0.465	0.4847		1.0097	1.0109	0.971		100	100	100		Lipid	Phosphatidylinositol (PI)	100000616	383907-33-3	3000	904.591
	1972			1-oleoyl-2-arachidonoyl-GPI (18:1/20:4) *	LC/MS pos late	54994		HMDB09844				0.95	1.11	1.17		0.2006	0.1693	0.5961	0.4964	0.2133	0.3794	0.0854	0.2489		1.0199	0.9691	1.1318		100	100	100		Lipid	Phosphatidylinositol (PI)	100010951		2568	902.575
	1990		Lysophospholipid	1-palmitoyl-GPA (16:0)	LC/MS neg	34428	C04036	HMDB00327	6419701			0.62	0.47	0.77		0.0009	0.0111	0.0058	0.0536	0.0003	0.0109	0.148	0.3088		1.4877	0.9155	0.7053		100	83	83		Lipid	Lysophospholipid	100001445	17618-08-5	5600	409.236
	1994			1-linoleoyl-GPA (18:2)*	LC/MS neg	52690		HMDB07856				0.52	0.57	1.09		0.0224	0.0727	0.0099	0.0733	0.0287	0.1447	0.6026	0.5344		1.5834	0.8286	0.9021		100	100	100		Lipid	Lysophospholipid	100009082		5483	433.236
	1996			1-arachidonoyl-GPA (20:4)	LC/MS neg	46325						0.55	0.64	1.17		0.3101	0.2173	0.1528	0.2575	0.2488	0.3932	0.7636	0.5959		1.5796	0.8688	1.015		100	83	83		Lipid	Lysophospholipid	100004442	799268-65-8	5499	457.236
	2003			1-palmitoyl-GPC (16:0)	LC/MS pos late	33955		HMDB10382	86554			0.99	0.94	0.95		0.6164	0.3198	0.7766	0.5476	0.3458	0.4498	0.5042	0.4982		1.0223	1.0074	0.9584		100	100	100		Lipid	Lysophospholipid	100001263	17364-16-8	1525	496.34
	2004			2-palmitoyl-GPC (16:0)*	LC/MS neg	35253		HMDB61702	15061532			0.92	0.75	0.81		0.0297	0.0747	0.3574	0.3923	0.0103	0.0949	0.0658	0.2309		1.1315	1.0465	0.852		100	100	100		Lipid	Lysophospholipid	100001562		6215	570.341
	2005			1-palmitoleoyl-GPC (16:1)*	LC/MS pos late	33230		HMDB10383	24779461			0.93	0.97	1.04		0.6505	0.3284	0.3619	0.3949	0.662	0.6114	0.6282	0.5451		1.0112	0.9439	0.9813		100	100	100		Lipid	Lysophospholipid	100001511		1450	494.324
	2006			2-palmitoleoyl-GPC (16:1)*	LC/MS neg	47118		HMDB10383				0.81	0.82	1		0.4165	0.2595	0.2685	0.3425	0.2451	0.3911	0.9524	0.6504		1.0711	0.8726	0.8738		100	67	33		Lipid	Lysophospholipid	100001561		5720	568.326
	2011			1-stearoyl-GPC (18:0)	LC/MS pos late	33961		HMDB10384	497299			1	0.93	0.92		0.1696	0.1571	0.8637	0.5793	0.1221	0.2893	0.0898	0.2508		1.0396	1.0447	0.9641		100	100	100		Lipid	Lysophospholipid	100001271	19420-57-6	1606	524.371
	2013			1-oleoyl-GPC (18:1)	LC/MS pos late	48258		HMDB02815	16081932			0.84	0.85	1		0.0024	0.02	0.0019	0.0287	0.0021	0.0395	0.9633	0.651		1.1339	0.9577	0.9617		100	100	100		Lipid	Lysophospholipid	100001272	19420-56-5	1540	522.355
	2016			1-linoleoyl-GPC (18:2)	LC/MS pos late	34419	C04100	HMDB10386	11988421			0.93	0.89	0.96		0.1285	0.144	0.2041	0.2993	0.048	0.189	0.4221	0.4672		1.0338	0.9616	0.9187		100	100	100		Lipid	Lysophospholipid	100001395		1465	520.34
	2018			1-linolenoyl-GPC (18:3)*	LC/MS pos late	45951		HMDB10388				0.86	0.85	0.99		0.2413	0.1902	0.1394	0.2488	0.1538	0.3287	0.9543	0.6505		1.1138	0.9556	0.9496		100	100	100		Lipid	Lysophospholipid	100005350		1410	518.324
	2033			1-arachidonoyl-GPC (20:4n6)*	LC/MS pos late	33228	C05208	HMDB10395				0.86	0.85	0.99		0.123	0.1406	0.0845	0.2084	0.0693	0.2134	0.9148	0.638		1.1136	0.9564	0.9475		100	100	100		Lipid	Lysophospholipid	100001551		1460	544.34
	2044			1-lignoceroyl-GPC (24:0)	LC/MS pos late	49617		HMDB10405				0.95	0.88	0.93		0.3169	0.2202	0.5856	0.4931	0.1407	0.3155	0.3341	0.4253		1.0963	1.0444	0.9669		100	100	100		Lipid	Lysophospholipid	100002873	325171-59-3	1907	608.465
	2051			1-palmitoyl-GPE (16:0)	LC/MS pos late	35631		HMDB11503	9547069			0.93	0.94	1.01		0.3714	0.2393	0.1941	0.2925	0.2764	0.4144	0.8213	0.6146		1.0552	0.9853	0.9951		100	100	100		Lipid	Lysophospholipid	100001567	53862-35-4	1544	454.293
	2058			1-stearoyl-GPE (18:0)	LC/MS pos late	42398		HMDB11130	9547068			1.06	0.95	0.9		0.3197	0.2205	0.3799	0.4047	0.5204	0.5463	0.1389	0.2995		1.0164	1.0767	0.9653		100	100	100		Lipid	Lysophospholipid	100001461	69747-55-3	1626	482.324
	2059			2-stearoyl-GPE (18:0)*	LC/MS neg	41220		HMDB11129				1.01	0.89	0.89		0.4985	0.2873	0.9348	0.5898	0.3323	0.4498	0.295	0.4119		1.0891	1.1012	0.9747		100	100	100		Lipid	Lysophospholipid	100003901		6350	480.31
	2060			1-oleoyl-GPE (18:1)	LC/MS pos late	35628		HMDB11506	9547071			0.95	0.82	0.86		0.3479	0.2308	0.824	0.5655	0.1812	0.3544	0.2579	0.3931		1.1418	1.0831	0.9341		100	100	100		Lipid	Lysophospholipid	100001569	89576-29-4	1554	480.308
	2062			1-linoleoyl-GPE (18:2)*	LC/MS pos late	36600		HMDB11507	52925130			0.98	0.95	0.96		0.828	0.3728	0.8352	0.5687	0.5517	0.5558	0.6968	0.5738		1.0025	0.9866	0.9475		100	100	100		Lipid	Lysophospholipid	100001570		1482	478.293
	2073			1-arachidonoyl-GPE (20:4n6)*	LC/MS pos late	35186		HMDB11517	42607465			1.13	1.08	0.96		0.4598	0.2738	0.2243	0.3136	0.4451	0.5044	0.6358	0.5472		0.9515	1.0715	1.0252		100	100	100		Lipid	Lysophospholipid	100001571		1470	502.293
	2084			1-oleoyl-GPS (18:1)	LC/MS neg	19260		HMDB61694	9547099			2.89	0.88	0.3		0.0243	0.0727	0.0261	0.1017	0.7	0.6209	0.0119	0.1499		0.5585	1.6156	0.492		67	83	33		Lipid	Lysophospholipid	100000630	326589-90-6	5607	522.284
	2095			1-linoleoyl-GPG (18:2)*	LC/MS neg	54885						0.78	0.67	0.86		0.0536	0.0874	0.0809	0.2065	0.0204	0.1263	0.482	0.4899		1.3144	1.0268	0.878		100	83	100		Lipid	Lysophospholipid	100009227		5516	507.273
	2096			1-palmitoyl-GPI (16:0)	LC/MS neg	35305		HMDB61695				1.04	1	0.96		0.8261	0.3726	0.7865	0.55	0.7349	0.6368	0.5441	0.512		1.0151	1.0546	1.0143		100	100	100		Lipid	Lysophospholipid	100001655		5564	571.289
	2099			1-stearoyl-GPI (18:0)	LC/MS neg	19324		HMDB61696				1.04	1.04	1.01		0.9101	0.3947	0.6871	0.5194	0.9372	0.6879	0.7456	0.5912		1.0131	1.0489	1.0555		100	100	100		Lipid	Lysophospholipid	100000656	796963-93-4	5794	599.32
	2103			1-linoleoyl-GPI (18:2)*	LC/MS neg	36594						0.91	0.59	0.65		0.0732	0.105	0.5617	0.4867	0.0298	0.147	0.0908	0.2508		1.2683	1.1561	0.7468		100	100	100		Lipid	Lysophospholipid	100001778		5494	595.289
	2107			1-arachidonoyl-GPI (20:4)*	LC/MS neg	34214		HMDB61690				0.98	0.89	0.91		0.5585	0.3039	0.8118	0.5593	0.3099	0.4357	0.4314	0.4672		1.0652	1.0413	0.9446		100	100	100		Lipid	Lysophospholipid	100001654		5482	619.289
	2188		Plasmalogen	1-(1-enyl-palmitoyl)-2-oleoyl-GPE (P-16:0/18:1)*	LC/MS pos late	52477		HMDB11342				1.16	0.8	0.69		0.1604	0.1562	0.4728	0.4519	0.2215	0.3794	0.0625	0.2299		1.0788	1.2565	0.8682		100	100	100		Lipid	Plasmalogen	100009005		2600	702.543
	2190			1-(1-enyl-palmitoyl)-2-palmitoyl-GPC (P-16:0/16:0)*	LC/MS pos late	52716		HMDB11206	11146967			0.8	0.89	1.11		0.0058	0.0342	0.0016	0.0259	0.0585	0.2006	0.0925	0.2508		1.1775	0.9423	1.0469		100	100	100		Lipid	Plasmalogen	100009162		2454	718.575
	2191			1-(1-enyl-palmitoyl)-2-palmitoleoyl-GPC (P-16:0/16:1)*	LC/MS pos late	52713		HMDB11207				0.78	0.91	1.16		0.2333	0.1861	0.0977	0.2185	0.5442	0.5555	0.2698	0.4005		1.0722	0.8354	0.971		100	100	100		Lipid	Plasmalogen	100009160		2218	716.559
	2192			1-(1-enyl-palmitoyl)-2-arachidonoyl-GPE (P-16:0/20:4)*	LC/MS pos late	52673		HMDB11352				1.23	0.97	0.78		0.1289	0.144	0.1138	0.2265	0.7299	0.6368	0.0604	0.2283		0.9724	1.1999	0.9397		100	100	100		Lipid	Plasmalogen	100009002		2270	724.528
	2194			1-(1-enyl-palmitoyl)-2-oleoyl-GPC (P-16:0/18:1)*	LC/MS pos late	52478						0.8	0.85	1.06		0.0039	0.0287	0.0014	0.0239	0.0114	0.0949	0.3203	0.4242		1.1663	0.9336	0.9872		100	100	100		Lipid	Plasmalogen	100009007		2443	744.59
	2197			1-(1-enyl-stearoyl)-2-linoleoyl-GPE (P-18:0/18:2)*	LC/MS pos late	52748		HMDB11376				1.38	0.91	0.66		0.1978	0.1675	0.2083	0.3031	0.602	0.5907	0.0845	0.2489		1.0157	1.4012	0.9196		100	100	83		Lipid	Plasmalogen	100009225		2633	728.559
	2200			1-(1-enyl-palmitoyl)-2-arachidonoyl-GPC (P-16:0/20:4)*	LC/MS pos late	52689		HMDB11220				0.86	0.88	1.03		0.0316	0.0769	0.0142	0.0801	0.0372	0.1735	0.6318	0.5462		1.1063	0.9488	0.9726		100	100	100		Lipid	Plasmalogen	100009014		2154	766.575
	2201			1-(1-enyl-palmitoyl)-2-linoleoyl-GPC (P-16:0/18:2)*	LC/MS pos late	52682		HMDB11211				1	0.89	0.9		0.2276	0.1833	0.8961	0.5846	0.1554	0.3292	0.1241	0.289		1.038	1.0348	0.9264		100	100	100		Lipid	Plasmalogen	100009009		2226	742.575
	2204			1-(1-enyl-stearoyl)-2-arachidonoyl-GPE (P-18:0/20:4)*	LC/MS pos late	52475		HMDB05779	9547058			1.08	0.8	0.74		0.024	0.0727	0.4796	0.4542	0.0394	0.1777	0.0093	0.1474		1.1015	1.1896	0.8771		100	100	100		Lipid	Plasmalogen	100008999		2511	752.559
	2218		Lysoplasmalogen	1-(1-enyl-palmitoyl)-GPC (P-16:0)*	LC/MS pos late	52474		HMDB10407	10917802			0.8	0.72	0.9		0.0309	0.076	0.0524	0.153	0.0117	0.0949	0.4569	0.4792		1.1846	0.9444	0.8532		100	100	100		Lipid	Lysoplasmalogen	100002875		1547	480.345
	2219			1-(1-enyl-palmitoyl)-GPE (P-16:0)*	LC/MS pos late	39270						1.22	1	0.82		0.1476	0.1555	0.0933	0.2185	0.9751	0.6945	0.0882	0.2508		0.9671	1.1751	0.965		100	100	100		Lipid	Lysoplasmalogen	100003000		1558	438.298
	2221			1-(1-enyl-oleoyl)-GPE (P-18:1)*	LC/MS neg	44621						1.21	0.87	0.72		0.2527	0.1953	0.4048	0.416	0.3925	0.4718	0.1028	0.2625		0.9616	1.1619	0.8392		100	100	100		Lipid	Lysoplasmalogen	100005372		6250	462.299
	2223			1-(1-enyl-stearoyl)-GPE (P-18:0)*	LC/MS pos late	39271						1.08	0.89	0.83		0.1916	0.1669	0.4626	0.448	0.2663	0.4062	0.0756	0.2422		1.0338	1.1143	0.9249		100	100	100		Lipid	Lysoplasmalogen	100003001		1649	466.329
	2226		Glycerolipid Metabolism	glycerol	LC/MS neg	15122	C00116	HMDB00131	753			1.22	1.21	0.99		0.7614	0.3561	0.5682	0.4888	0.4989	0.536	0.9143	0.638		0.9605	1.1713	1.1617		100	100	100		Lipid	Glycerolipid Metabolism	1254	56-81-5	758	91.0401
	2227			glycerol 3-phosphate	LC/MS pos early	43847	C00093	HMDB00126	754			1.79	0.82	0.46		0.194	0.1669	0.1127	0.226	0.9572	0.6945	0.1239	0.289		1.0596	1.895	0.8733		100	100	100		Lipid	Glycerolipid Metabolism	100000258	29849-82-9	580	173.021
	2232			glycerophosphoglycerol	LC/MS polar	48857	C03274		439964			1.37	0.6	0.44		0.0582	0.092	0.4054	0.416	0.105	0.2655	0.0209	0.1893		1.2891	1.7676	0.7714		100	100	100		Lipid	Glycerolipid Metabolism	100001619		2430	245.043
	2236		Monoacylglycerol	1-palmitoylglycerol (16:0)	LC/MS neg	21127		HMDB31074	14900			0.48	0.56	1.18		0.5411	0.2996	0.2771	0.3462	0.5313	0.5509	0.6332	0.5462		1.8307	0.8725	1.0332		100	100	100		Lipid	Monoacylglycerol	100000827	542-44-9	6550	255.233
	2239			1-stearoylglycerol (18:0)	LC/MS pos late	52390	D01947	HMDB31075	24699			3.56	4.13	1.16		6.3221e-05	0.0026	0.0001	0.0063	4.7208e-05	0.0049	0.6791	0.5647		0.3424	1.2197	1.4155		100	100	100		Lipid	Monoacylglycerol	100000932	123-94-4;31566-31-1	1830	376.342
	2240			1-oleoylglycerol (18:1)	LC/MS neg	21184		HMDB11567	5283468			0.92	1.15	1.25		0.7685	0.3576	0.5998	0.4976	0.872	0.666	0.4947	0.4964		1.0216	0.9376	1.1716		100	67	100		Lipid	Monoacylglycerol	100000924	111-03-5	6650	281.249
	2241			1-linoleoylglycerol (18:2)	LC/MS neg	27447			5283469			1.16	0.82	0.71		0.3621	0.2358	0.7428	0.5339	0.2985	0.4268	0.1786	0.33		1.0125	1.1717	0.8342		100	100	100		Lipid	Monoacylglycerol	100001040	2277-28-3	6477	279.233
	2245			1-dihomo-linolenylglycerol (20:3)	LC/MS neg	48341						1.17	0.9	0.77		0.6896	0.34	0.6341	0.5042	0.7056	0.6226	0.3975	0.4562		0.8185	0.9596	0.7369		67	67	67		Lipid	Monoacylglycerol	100006121		6400	305.249
	2246			1-arachidonylglycerol (20:4)	LC/MS pos late	52401	C13857	HMDB11549	5282281			0.95	0.96	1		0.9386	0.4016	0.7462	0.5342	0.7812	0.6428	0.9632	0.651		1.0905	1.0412	1.0447		100	100	100		Lipid	Monoacylglycerol	100001433	35474-99-8	1568	396.311
	2249			1-docosahexaenoylglycerol (22:6)	LC/MS pos late	52402		HMDB11587				1.29	0.95	0.74		0.4482	0.2692	0.4466	0.4444	0.6171	0.6007	0.2159	0.3598		0.9993	1.2885	0.9473		100	100	100		Lipid	Monoacylglycerol	100001481		1542	420.311
	2251			2-palmitoylglycerol (16:0)	LC/MS neg	33419		HMDB11533	123409			0.99	0.81	0.82		0.5157	0.2888	0.9291	0.5898	0.3471	0.4498	0.3054	0.4185		1.0346	1.0257	0.8364		100	100	100		Lipid	Monoacylglycerol	100001048	23470-00-0	6400	255.233
	2255			2-linoleoylglycerol (18:2)	LC/MS neg	32506		HMDB11538	5365676			1.02	0.73	0.72		0.1412	0.1516	0.939	0.5905	0.0934	0.2467	0.0812	0.2489		1.0504	1.0705	0.7704		100	83	83		Lipid	Monoacylglycerol	100000987	3443-82-1	6250	279.233
	2263		Diacylglycerol	diacylglycerol (14:0/18:1, 16:0/16:1) [2]*	LC/MS pos late	54954						2.5	0.82	0.33		0.0093	0.0468	0.0118	0.0746	0.6486	0.6072	0.0046	0.1474		0.4739	1.1847	0.3906		33	83	33		Lipid	Diacylglycerol	100010935		3183	584.525
	2275			palmitoyl-palmitoyl-glycerol (16:0/16:0) [1]*	LC/MS pos late	54991		HMDB07098				1.36	0.69	0.51		0.1496	0.1555	0.3657	0.3966	0.2709	0.4085	0.0555	0.2247		0.9675	1.3149	0.6708		83	83	67		Lipid	Diacylglycerol	100010947		3568	586.541
	2276			palmitoyl-palmitoyl-glycerol (16:0/16:0) [2]*	LC/MS pos late	54990		HMDB07098				1.32	0.64	0.49		0.1378	0.1486	0.2147	0.3073	0.4271	0.492	0.0519	0.2247		1.1348	1.4977	0.731		100	100	100		Lipid	Diacylglycerol	100010948		3734	586.541
	2279			palmitoyl-oleoyl-glycerol (16:0/18:1) [1]*	LC/MS pos late	54943	C13861	HMDB07102				1.3	0.77	0.59		0.0282	0.0747	0.1602	0.2632	0.1433	0.3195	0.0086	0.1474		0.9786	1.2726	0.7516		100	100	100		Lipid	Diacylglycerol	100010916		3562	612.556
	2280			palmitoyl-oleoyl-glycerol (16:0/18:1) [2]*	LC/MS pos late	54942	C13861	HMDB07102				1.4	0.74	0.53		0.036	0.0798	0.1085	0.2221	0.2606	0.4033	0.0116	0.1499		0.9999	1.4022	0.7407		100	100	100		Lipid	Diacylglycerol	100010917		3695	612.556
	2281			palmitoyl-linoleoyl-glycerol (16:0/18:2) [1]*	LC/MS pos late	52633		HMDB07103	9543695			1.72	0.89	0.52		0.0216	0.0727	0.0307	0.1089	0.5521	0.5558	0.0091	0.1474		0.8163	1.4069	0.7277		100	100	100		Lipid	Diacylglycerol	100009052		3080	610.541
	2282			palmitoyl-linoleoyl-glycerol (16:0/18:2) [2]*	LC/MS pos late	52634		HMDB07103				1.59	0.79	0.49		0.0426	0.0839	0.0765	0.1964	0.4197	0.4889	0.0154	0.1692		0.845	1.3477	0.6659		100	100	100		Lipid	Diacylglycerol	100009055		3197	610.541
	2288			palmitoyl-arachidonoyl-glycerol (16:0/20:4) [1]*	LC/MS pos late	54957		HMDB07112				1.28	0.78	0.61		0.1648	0.1562	0.315	0.3716	0.3431	0.4498	0.0618	0.2292		1.0005	1.2791	0.7797		100	100	100		Lipid	Diacylglycerol	100010924		2916	634.541
	2289			palmitoyl-arachidonoyl-glycerol (16:0/20:4) [2]*	LC/MS pos late	54958		HMDB07112				1.24	0.65	0.52		0.2128	0.1756	0.3556	0.3923	0.382	0.4659	0.0835	0.2489		1.04	1.2941	0.6749		100	100	67		Lipid	Diacylglycerol	100010925		3015	634.541
	2305			linoleoyl-linoleoyl-glycerol (18:2/18:2) [1]*	LC/MS pos late	54968		HMDB07248				1.65	1.11	0.67		0.0267	0.0744	0.015	0.0815	0.8268	0.6494	0.0233	0.1893		0.7646	1.2615	0.8487		100	100	100		Lipid	Diacylglycerol	100010941		2689	634.541
	2311			stearoyl-arachidonoyl-glycerol (18:0/20:4) [1]*	LC/MS pos late	57450						1.09	0.82	0.76		0.7982	0.3657	0.6931	0.5219	0.791	0.6446	0.5117	0.5012		1.3867	1.5106	1.1433		100	100	100		Lipid	Diacylglycerol	100010949		3404	662.572
	2312			stearoyl-arachidonoyl-glycerol (18:0/20:4) [2]*	LC/MS pos late	57449						1.12	0.75	0.67		0.7068	0.3419	0.7345	0.5321	0.6291	0.6015	0.4149	0.4636		1.4637	1.6329	1.0975		100	100	100		Lipid	Diacylglycerol	100010950		3522	662.572
	2314			oleoyl-arachidonoyl-glycerol (18:1/20:4) [2]*	LC/MS pos late	54961		HMDB07228				1.31	0.79	0.6		0.1005	0.1252	0.1842	0.2804	0.377	0.4626	0.0361	0.1966		0.9054	1.1862	0.7166		100	100	100		Lipid	Diacylglycerol	100010937		2990	660.556
	2315			linoleoyl-arachidonoyl-glycerol (18:2/20:4) [1]*	LC/MS pos late	54955		HMDB07257				1.34	0.85	0.64		0.0298	0.0747	0.1044	0.2198	0.2296	0.3855	0.0093	0.1474		0.9307	1.2429	0.7934		100	100	100		Lipid	Diacylglycerol	100010922		2566	658.541
	2316			linoleoyl-arachidonoyl-glycerol (18:2/20:4) [2]*	LC/MS pos late	54956		HMDB07257				1.39	0.86	0.62		0.0504	0.0872	0.092	0.2185	0.4064	0.4788	0.018	0.1817		0.8472	1.1755	0.7279		100	100	100		Lipid	Diacylglycerol	100010923		2624	658.541
	2319			linoleoyl-docosahexaenoyl-glycerol (18:2/22:6) [1]*	LC/MS pos late	54949						1.56	0.89	0.57		0.0185	0.0674	0.0393	0.1282	0.3869	0.4678	0.0066	0.1474		0.8561	1.3316	0.7649		100	100	100		Lipid	Diacylglycerol	100010928		2417	682.541
	2320			linoleoyl-docosahexaenoyl-glycerol (18:2/22:6) [2]*	LC/MS pos late	54950		HMDB07266				1.54	0.86	0.56		0.0229	0.0727	0.0493	0.1453	0.3757	0.4626	0.0081	0.1474		0.7946	1.2234	0.6801		100	100	100		Lipid	Diacylglycerol	100010929		2468	682.541
	2341		Sphingolipid Metabolism	sphinganine	LC/MS pos late	17769	C00836	HMDB00269	3126			1.67	0.7	0.42		0.0851	0.1154	0.1006	0.2185	0.579	0.5744	0.0351	0.1943		0.9438	1.5769	0.6603		100	100	100		Lipid	Sphingolipid Metabolism	313	3102-56-5	1413	302.305
	2342			sphinganine-1-phosphate	LC/MS pos late	52605		HMDB01383	520			0.89	0.9	1.01		0.6036	0.3159	0.3339	0.3876	0.761	0.6386	0.5016	0.4982		1.1193	0.9965	1.0033		100	100	100		Lipid	Sphingolipid Metabolism	100001876	19794-97-9	1431	382.272
	2345			N-palmitoyl-sphinganine (d18:0/16:0)	LC/MS pos late	52604		HMDB11760	5283572			1.21	0.69	0.57		0.0777	0.1088	0.2876	0.3474	0.1939	0.3632	0.0264	0.1893		0.6909	0.8391	0.4796		33	83	33		Lipid	Sphingolipid Metabolism	100009028	5966-29-0	3090	540.535
	2355			myristoyl dihydrosphingomyelin (d18:0/14:0)*	LC/MS pos late	57365		HMDB12085				1.62	1.17	0.73		0.0124	0.0541	0.0038	0.0444	0.2153	0.3794	0.0506	0.2247		0.7864	1.2709	0.9221		100	100	100		Lipid	Sphingolipid Metabolism	100009038		2060	677.559
	2356			palmitoyl dihydrosphingomyelin (d18:0/16:0)*	LC/MS pos late	52434			9939965			1.22	0.98	0.8		0.0458	0.0867	0.0304	0.1089	0.9986	0.6982	0.0303	0.1893		0.9343	1.1425	0.9174		100	100	100		Lipid	Sphingolipid Metabolism	100008954		2290	705.591
	2358			palmitoyl sphingomyelin (d18:1/16:0)	LC/MS pos late	37506			9939941			1.13	1.01	0.89		0.08	0.1103	0.0413	0.1301	0.8145	0.6446	0.0648	0.2309		0.9772	1.1029	0.9851		100	100	100		Lipid	Sphingolipid Metabolism	100002107	6254-89-3	2168	703.575
	2359			stearoyl sphingomyelin (d18:1/18:0)	LC/MS pos late	19503	C00550	HMDB01348	6453725			1.13	0.99	0.88		0.0524	0.0872	0.0409	0.1301	0.8644	0.6648	0.0292	0.1893		0.9665	1.0896	0.9591		100	100	100		Lipid	Sphingolipid Metabolism	1538	85187-10-6;85187-10-6	2400	731.606
	2360			behenoyl sphingomyelin (d18:1/22:0)*	LC/MS pos late	48492		HMDB12103				1.18	0.94	0.8		0.0323	0.0774	0.0543	0.1557	0.4583	0.5151	0.0122	0.1499		0.9639	1.1337	0.9087		100	100	100		Lipid	Sphingolipid Metabolism	100006294		3083	787.669
	2361			tricosanoyl sphingomyelin (d18:1/23:0)*	LC/MS pos late	52436		HMDB12105				1.28	0.93	0.73		0.004	0.0287	0.0102	0.0734	0.3694	0.4601	0.0015	0.1155		0.9162	1.1731	0.8505		100	100	100		Lipid	Sphingolipid Metabolism	100008955		3200	801.684
	2362			lignoceroyl sphingomyelin (d18:1/24:0)	LC/MS pos late	57330						1.29	1.03	0.8		0.0067	0.0377	0.0038	0.0444	0.737	0.6368	0.0076	0.1474		0.8898	1.1473	0.9186		100	100	100		Lipid	Sphingolipid Metabolism	100006298	60037-60-7	3437	815.7
	2364			sphingomyelin (d18:1/14:0, d16:1/16:0)*	LC/MS pos late	42463		HMDB12097	11433862			1.23	1.08	0.88		0.0297	0.0747	0.0096	0.0727	0.2844	0.4197	0.0833	0.2489		0.9215	1.1326	0.9924		100	100	100		Lipid	Sphingolipid Metabolism	100004328		1998	675.544
	2365			sphingomyelin (d18:2/14:0, d18:1/14:1)*	LC/MS pos late	47154						1.26	1.14	0.91		0.0231	0.0727	0.0072	0.0601	0.0795	0.2272	0.24	0.3775		0.8868	1.1147	1.0143		100	100	100		Lipid	Sphingolipid Metabolism	100005985		1860	673.528
	2366			sphingomyelin (d17:1/16:0, d18:1/15:0, d16:1/17:0)*	LC/MS pos late	52433						1.11	0.91	0.82		0.0461	0.0867	0.158	0.2626	0.2234	0.3794	0.0147	0.1692		1.0135	1.122	0.9237		100	100	100		Lipid	Sphingolipid Metabolism	100006314	121999-58-4	2082	689.559
	2367			sphingomyelin (d18:2/16:0, d18:1/16:1)*	LC/MS pos late	42459						0.95	0.93	0.98		0.6246	0.3215	0.5122	0.4642	0.352	0.4506	0.7763	0.5978		1.056	1.0019	0.9785		100	100	100		Lipid	Sphingolipid Metabolism	100004329		2002	701.559
	2368			sphingomyelin (d18:1/17:0, d17:1/18:0, d19:1/16:0)	LC/MS pos late	52615						1.03	0.9	0.88		0.2266	0.1831	0.6445	0.5042	0.22	0.3794	0.1004	0.2582		1.0463	1.0747	0.9459		100	100	100		Lipid	Sphingolipid Metabolism	100008920	121999-64-2	2312	717.591
	2369			sphingomyelin (d18:1/18:1, d18:2/18:0)	LC/MS pos late	37529		HMDB12101	6443882			0.97	0.9	0.92		0.1573	0.1562	0.6651	0.5113	0.0697	0.2134	0.1514	0.3088		1.103	1.0749	0.9875		100	100	100		Lipid	Sphingolipid Metabolism	100002106	108392-10-5	2167	729.591
	2370			sphingomyelin (d18:1/20:0, d16:1/22:0)*	LC/MS pos late	48490		HMDB12102				1.23	0.95	0.77		0.0228	0.0727	0.0316	0.1112	0.5612	0.561	0.0096	0.1474		1.0024	1.2367	0.9475		100	100	100		Lipid	Sphingolipid Metabolism	100006290		2685	759.638
	2371			sphingomyelin (d18:1/20:1, d18:2/20:0)*	LC/MS pos late	48491						1.11	1.06	0.96		0.1919	0.1669	0.0752	0.1964	0.2788	0.4144	0.4429	0.4708		0.957	1.0667	1.0188		100	100	100		Lipid	Sphingolipid Metabolism	100006292	222403-67-0	2383	757.622
	2372			sphingomyelin (d18:1/21:0, d17:1/22:0, d16:1/23:0)*	LC/MS pos late	52495						1.21	0.95	0.79		0.082	0.1123	0.0901	0.2176	0.6204	0.6011	0.035	0.1943		0.9377	1.1316	0.8927		100	100	100		Lipid	Sphingolipid Metabolism	100009025		2793	773.653
	2373			sphingomyelin (d18:1/22:1, d18:2/22:0, d16:1/24:1)*	LC/MS pos late	48493		HMDB12104				1.04	0.93	0.9		0.2708	0.2018	0.5014	0.459	0.3372	0.4498	0.1136	0.2775		0.991	1.0266	0.9208		100	100	100		Lipid	Sphingolipid Metabolism	100006295		2666	785.653
	2374			sphingomyelin (d18:2/23:0, d18:1/23:1, d17:1/24:1)*	LC/MS pos late	52435						1.07	0.93	0.87		0.2312	0.185	0.3631	0.395	0.4033	0.4772	0.0923	0.2508		0.976	1.0395	0.9091		100	100	100		Lipid	Sphingolipid Metabolism	100008956		2845	799.669
	2375			sphingomyelin (d18:1/24:1, d18:2/24:0)*	LC/MS pos late	47153		HMDB12107				1.04	0.94	0.91		0.3867	0.2452	0.5145	0.4642	0.4621	0.5161	0.1754	0.3285		1.0044	1.042	0.9482		100	100	100		Lipid	Sphingolipid Metabolism	100005986	94359-13-4	3033	813.684
	2376			sphingomyelin (d18:2/24:1, d18:1/24:2)*	LC/MS pos late	52437						0.9	0.88	0.98		0.1444	0.1544	0.1251	0.2398	0.068	0.2134	0.7367	0.5889		1.1029	0.9885	0.9676		100	100	100		Lipid	Sphingolipid Metabolism	100008957		2635	811.669
	2379			sphingosine	LC/MS pos late	17747	C00319	HMDB00252	5353955			1.3	0.67	0.52		0.1906	0.1669	0.2647	0.34	0.463	0.5161	0.0752	0.2422		1.2016	1.5566	0.8074		100	100	100		Lipid	Sphingolipid Metabolism	297	123-78-4	1393	300.29
	2380			sphingosine 1-phosphate	LC/MS polar	34445	C06124	HMDB00277	5283560			0.72	0.89	1.23		0.2484	0.1926	0.1118	0.226	0.6589	0.6114	0.2344	0.3733		1.259	0.911	1.1239		100	100	100		Lipid	Sphingolipid Metabolism	100000626	26993-30-6	1850	378.241
	2383			sphingomyelin (d18:2/23:1)*	LC/MS pos late	57482						0.92	0.88	0.95		0.3742	0.2402	0.4493	0.4452	0.1682	0.3435	0.5122	0.5012		1.1142	1.0305	0.9772		100	100	100		Lipid	Sphingolipid Metabolism	100015791		2315	797.653
	2384			sphingomyelin (d18:2/21:0, d16:2/23:0)*	LC/MS pos late	57480						1.07	0.85	0.8		0.2756	0.202	0.5766	0.4914	0.2971	0.4268	0.1195	0.2867		0.9919	1.0594	0.8431		100	100	100		Lipid	Sphingolipid Metabolism	100015790		2330	771.637
	2385			sphingomyelin (d18:1/20:2, d18:2/20:1, d16:1/22:2)*	LC/MS pos late	57481						1.04	1	0.97		0.8592	0.3806	0.63	0.5042	0.98	0.6945	0.6477	0.5538		0.9871	1.0217	0.9864		100	100	100		Lipid	Sphingolipid Metabolism	100006293		2039	755.606
	2386			sphingomyelin (d18:2/24:2)*	LC/MS pos late	57479						0.94	0.94	1		0.4174	0.2595	0.2321	0.3184	0.2892	0.4212	0.8853	0.6371		1.0639	0.9973	1.0018		100	100	100		Lipid	Sphingolipid Metabolism	100015789		2215	809.653
	2390			sphingomyelin (d18:1/22:2, d18:2/22:1, d16:1/24:2)*	LC/MS pos late	57477						1.05	1.01	0.97		0.746	0.3512	0.4578	0.4456	0.7915	0.6446	0.6292	0.5451		0.9515	0.9972	0.9625		100	100	100		Lipid	Sphingolipid Metabolism	100006296		2209	783.637
	2392			sphingomyelin (d18:0/18:0, d19:0/17:0)*	LC/MS pos late	57473		HMDB12087				1.28	0.82	0.64		0.1271	0.1433	0.177	0.2751	0.4794	0.5273	0.049	0.2215		1.0946	1.3987	0.8955		100	100	100		Lipid	Sphingolipid Metabolism	100009027		2362	733.622
	2394			sphingomyelin (d18:2/18:1)*	LC/MS pos late	57474						0.86	0.81	0.94		0.0694	0.1012	0.1022	0.2185	0.0264	0.1421	0.4814	0.4899		1.1157	0.9547	0.9006		100	100	100		Lipid	Sphingolipid Metabolism	100015788		1904	727.575
	2395			sphingomyelin (d18:1/19:0, d19:1/18:0)*	LC/MS pos late	57475						1.12	0.89	0.8		0.0485	0.0872	0.1913	0.29	0.1933	0.3632	0.0155	0.1692		1.0017	1.1264	0.8955		100	100	100		Lipid	Sphingolipid Metabolism	100015787		2330	745.622
	2400			sphingadienine	LC/MS pos late	57426			6449795			1.21	0.68	0.56		0.4276	0.2619	0.3919	0.4114	0.67	0.6133	0.2078	0.3564		1.0976	1.325	0.7468		67	83	50		Lipid	Sphingolipid Metabolism	100015643	25696-03-1	1350	298.274
	2442		Ceramides	N-palmitoyl-sphingosine (d18:1/16:0)	LC/MS pos late	44877		HMDB04949	5283564			1.38	0.86	0.62		0.0633	0.0969	0.0957	0.2185	0.4739	0.5251	0.0239	0.1893		1.0392	1.437	0.8952		100	100	100		Lipid	Ceramides	1518	24696-26-2	2893	538.519
	2444			N-stearoyl-sphingosine (d18:1/18:0)*	LC/MS pos late	54979		HMDB04950	5283565			1.45	0.85	0.59		0.0287	0.0747	0.0531	0.154	0.4231	0.4915	0.0105	0.1474		1.0562	1.5359	0.902		100	100	100		Lipid	Ceramides	1547	104404-17-3	3392	566.551
	2448			ceramide (d18:1/14:0, d16:1/16:0)*	LC/MS pos late	57432						2.16	0.93	0.43		0.0043	0.0295	0.0037	0.0444	0.9475	0.691	0.0032	0.1404		0.7859	1.6996	0.7313		50	100	83		Lipid	Ceramides	100015735		2477	510.488
	2451			ceramide (d18:2/24:1, d18:1/24:2)*	LC/MS pos late	57443						1.08	0.91	0.85		0.2938	0.2089	0.5152	0.4642	0.3542	0.4506	0.1255	0.289		1.018	1.0955	0.926		100	100	100		Lipid	Ceramides	100015744		3858	646.613
	2452			glycosyl-N-palmitoyl-sphingosine (d18:1/16:0)	LC/MS pos late	53013						1.09	1.14	1.06		0.1945	0.1669	0.2861	0.3474	0.0762	0.223	0.4369	0.4682		0.9528	1.0338	1.0908		100	100	100		Lipid	Ceramides	100009272		2623	700.572
	2453			glycosyl-N-stearoyl-sphingosine (d18:1/18:0)	LC/MS pos late	52234						1.07	1.09	1.03		0.4935	0.2873	0.3939	0.4123	0.2607	0.4033	0.7749	0.5978		0.9285	0.9912	1.0163		100	100	100		Lipid	Ceramides	100001882		3053	728.604
	2456			glycosyl-N-behenoyl-sphingadienine (d18:2/22:0)*	LC/MS pos late	57421						1.15	1.56	1.35		0.0233	0.0727	0.2829	0.3474	0.0076	0.0949	0.0675	0.231		0.7376	0.8516	1.1488		100	100	100		Lipid	Ceramides	100015625		3420	782.65
	2466			glycosyl ceramide (d16:1/24:1, d18:1/22:1)*	LC/MS pos late	57457						0.84	0.79	0.94		0.5049	0.2873	0.471	0.4519	0.2548	0.3986	0.663	0.5566		1.1017	0.926	0.8733		100	100	100		Lipid	Ceramides	100015730		3373	782.65
	2467			glycosyl ceramide (d18:1/20:0, d16:1/22:0)*	LC/MS pos late	57595						1.23	1.15	0.93		0.1258	0.1425	0.0492	0.1453	0.1666	0.3423	0.5031	0.4982		0.923	1.1347	1.0579		100	100	100		Lipid	Ceramides	100015882		3414	756.635
	2468			glycosyl ceramide (d18:1/23:1, d17:1/24:1)*	LC/MS pos late	57448						0.9	0.94	1.04		0.8682	0.3837	0.6026	0.4976	0.7622	0.6386	0.826	0.6153		0.989	0.892	0.9307		100	83	83		Lipid	Ceramides	100015751		3667	796.666
	2469			glycosyl ceramide (d18:2/24:1, d18:1/24:2)*	LC/MS pos late	57453						0.99	1.13	1.14		0.0952	0.1205	0.8115	0.5593	0.0764	0.223	0.0486	0.2215		0.9782	0.965	1.104		100	100	100		Lipid	Ceramides	100015745		3380	808.666
	2477		Mevalonate Metabolism	3-hydroxy-3-methylglutarate	LC/MS polar	531	C03761	HMDB00355	1662			0.97	0.94	0.97		0.9715	0.4099	0.9603	0.5946	0.8608	0.6648	0.8219	0.6146		1.0574	1.026	0.9924		100	100	100		Lipid	Mevalonate Metabolism	112	503-49-1	2850	161.046
	2478			mevalonate	LC/MS polar	39583	C02104	HMDB00227	439230			0.93	0.81	0.87		0.1039	0.127	0.4657	0.4498	0.0394	0.1777	0.1523	0.3088		1.0774	1.0041	0.8695		100	100	100		Lipid	Mevalonate Metabolism	30	96949-03-0	1462	147.066
	2492		Sterol	cholesterol	LC/MS pos late	63	C00187	HMDB00067	11025495			0.96	1.04	1.08		0.5291	0.2956	0.5261	0.4706	0.624	0.6015	0.2683	0.3998		1.0469	1.0047	1.0875		100	100	100		Lipid	Sterol	266	57-88-5	2707	369.352
	2502			7-alpha-hydroxy-3-oxo-4-cholestenoate (7-Hoca)	LC/MS neg	36776	C17337	HMDB12458	3081085			0.78	0.81	1.04		0.1849	0.1656	0.0956	0.2185	0.1366	0.3095	0.8399	0.6194		1.2266	0.9529	0.9889		100	100	100		Lipid	Sterol	100001609	115538-85-7	5288.1	429.301
	2515			4-cholesten-3-one	LC/MS pos late	38125	C00599	HMDB00921	91477			0.94	0.86	0.91		0.0757	0.1066	0.342	0.3909	0.0262	0.1421	0.1585	0.3103		1.0739	1.013	0.9263		100	100	100		Lipid	Sterol	100002227	601-57-0	2520	385.346
	2586		Corticosteroids	corticosterone	LC/MS neg	5983	C02140	HMDB01547	5753			0.76	0.86	1.14		0.0012	0.0134	0.0003	0.0096	0.0228	0.1315	0.0525	0.2247		1.1336	0.858	0.9801		100	100	100		Lipid	Corticosteroids	272	50-22-6	5040	345.207
	2681		Primary Bile Acid Metabolism	cholate	LC/MS neg	22842	C00695	HMDB00619	221493			0.26	0.65	2.52		0.087	0.1167	0.0417	0.1301	0.0778	0.2255	0.7431	0.5912		4.6383	1.1914	3.0053		100	83	83		Lipid	Primary Bile Acid Metabolism	136	81-25-4	5165	407.28
	2683			taurocholate	LC/MS neg	18497	C05122	HMDB00036	6675			1.21	2.5	2.06		0.7726	0.3582	0.6426	0.5042	0.4875	0.5293	0.815	0.6129		0.9202	1.1146	2.301		100	100	100		Lipid	Primary Bile Acid Metabolism	1648	145-42-6	5150	514.284
	2686			taurochenodeoxycholate	LC/MS neg	18494	C05465	HMDB00951	387316			1.48	3.45	2.34		0.4988	0.2873	0.492	0.459	0.2482	0.3932	0.6264	0.5451		0.8955	1.3219	3.091		100	100	100		Lipid	Primary Bile Acid Metabolism	1629	6009-98-9	5250	498.289
	2687			beta-muricholate	LC/MS neg	31885	C17726	HMDB00415	5283853			0.31	0.47	1.54		0.1499	0.1555	0.0841	0.2084	0.1014	0.2581	0.9175	0.6387		3.1781	0.9751	1.4989		100	100	100		Lipid	Primary Bile Acid Metabolism	100001066	2393-59-1	4794	407.28
	2688			alpha-muricholate	LC/MS neg	34092	C17647	HMDB00506	3083761			0.17	0.35	2.14		0.0407	0.0834	0.0197	0.0873	0.0404	0.178	0.7193	0.5826		4.3826	0.7243	1.547		100	83	67		Lipid	Primary Bile Acid Metabolism	100001280	2393-58-0	4765	407.28
	2689			tauro-alpha-muricholate	LC/MS neg	42605						0.73	1.5	2.05		0.7275	0.3462	0.4942	0.459	0.4974	0.5358	0.9958	0.6605		1.2651	0.9218	1.8921		100	83	67		Lipid	Primary Bile Acid Metabolism	100004064		4745	514.284
	2690			tauro-beta-muricholate	LC/MS neg	33983		HMDB00932	168408			1.03	2.13	2.07		0.9193	0.3967	0.9449	0.5911	0.7047	0.6226	0.7564	0.5941		0.9732	1.0039	2.0743		100	100	100		Lipid	Primary Bile Acid Metabolism	100001250	25696-60-0	4774	514.284
	2700		Secondary Bile Acid Metabolism	deoxycholate	LC/MS neg	1114	C04483	HMDB00626	222528			0.47	0.46	0.99		0.1329	0.1466	0.1521	0.2575	0.0547	0.1992	0.5741	0.5236		1.7743	0.8266	0.8155		100	100	100		Lipid	Secondary Bile Acid Metabolism	302	83-44-3	5294	391.285
	2703			taurodeoxycholate	LC/MS neg	12261	C05463	HMDB00896	2733768			1.3	1.57	1.21		0.8695	0.3837	0.6203	0.5042	0.6993	0.6209	0.9122	0.638		0.9092	1.1804	1.4289		100	100	100		Lipid	Secondary Bile Acid Metabolism	1668	207737-97-1	5257.4	498.289
	2712			ursodeoxycholate	LC/MS neg	1605	C07880	HMDB00946	31401			0.23	0.3	1.28		0.0601	0.0931	0.0294	0.1089	0.0548	0.1992	0.7505	0.594		4.4089	1.0213	1.3085		100	83	83		Lipid	Secondary Bile Acid Metabolism	1135	128-13-2	5055	391.285
	2715			tauroursodeoxycholate	LC/MS neg	39378		HMDB00874	9848818			1.19	1.92	1.61		0.8962	0.3921	0.6504	0.5066	0.7661	0.6387	0.8753	0.6343		1.1294	1.3472	2.1734		100	100	100		Lipid	Secondary Bile Acid Metabolism	100002912	14605-22-2	5025	498.289
	2725			taurohyodeoxycholic acid	LC/MS neg	43588			119046			0.3	0.41	1.38		0.1354	0.1473	0.1071	0.2216	0.0679	0.2134	0.8034	0.6092		2.5543	0.7682	1.0568		100	83	83		Lipid	Secondary Bile Acid Metabolism	100003869	38411-85-7	5073	498.289
	2733			7-ketodeoxycholate	LC/MS neg	31904		HMDB00391	188292			0.06	0.14	2.51		0.0006	0.0111	0.0002	0.0071	0.0043	0.0691	0.1426	0.3015		5.9279	0.3282	0.8245		100	83	83		Lipid	Secondary Bile Acid Metabolism	100001063	911-40-0	4821	405.265
	2741			ursocholate	LC/MS neg	57573						0.26	0.7	2.68		0.0192	0.0691	0.0064	0.0563	0.3081	0.4357	0.0518	0.2247		1.7579	0.4603	1.2339		100	50	83		Lipid	Secondary Bile Acid Metabolism	100002913	2955-27-3	4648	407.28
	3307	Nucleotide	Purine Metabolism, (Hypo)Xanthine/Inosine containing	inosine	LC/MS neg	1123	C00294	HMDB00195	6021			4.16	3.18	0.77		0.0205	0.0717	0.0188	0.0863	0.0115	0.0949	0.8095	0.6112		0.3949	1.641	1.2558		100	100	100		Nucleotide	Purine Metabolism, (Hypo)Xanthine/Inosine containing	361	58-63-9	1602.1	267.073
	3308			hypoxanthine	LC/MS neg	3127	C00262	HMDB00157	790			2.28	1.26	0.55		0.2413	0.1902	0.0972	0.2185	0.4039	0.4772	0.377	0.4522		0.7161	1.6347	0.9009		67	100	100		Nucleotide	Purine Metabolism, (Hypo)Xanthine/Inosine containing	171	68-94-0	1291.2	135.031
	3309			xanthine	LC/MS neg	3147	C00385	HMDB00292	1188			1.06	0.85	0.8		0.4619	0.2738	0.6878	0.5194	0.4133	0.4829	0.2301	0.3707		1.0493	1.1147	0.8889		67	100	100		Nucleotide	Purine Metabolism, (Hypo)Xanthine/Inosine containing	1004	69-89-6	910	151.026
	3311			xanthosine	LC/MS neg	15136	C01762	HMDB00299	64959			0.76	0.31	0.41		0.0947	0.1204	0.9868	0.6037	0.0605	0.2056	0.0586	0.2247		2.3992	1.8142	0.7474		100	100	100		Nucleotide	Purine Metabolism, (Hypo)Xanthine/Inosine containing	100000299	146-80-5	1075	283.068
	3314			N1-methylinosine	LC/MS pos early	48351		HMDB02721	65095			1.35	1.23	0.91		0.0406	0.0834	0.0156	0.0815	0.0623	0.2084	0.4872	0.4913		0.8667	1.1678	1.0619		100	100	100		Nucleotide	Purine Metabolism, (Hypo)Xanthine/Inosine containing	100001409	20245-33-4	1430	283.104
	3317			urate	LC/MS neg	1604	C00366	HMDB00289	1175			0.49	0.42	0.86		0.0021	0.019	0.0049	0.0519	0.0009	0.0201	0.4135	0.4636		1.9555	0.9626	0.8266		100	100	100		Nucleotide	Purine Metabolism, (Hypo)Xanthine/Inosine containing	1134	69-93-2;120K5305	757.1	167.021
	3318			allantoin	LC/MS polar	1107	C02350	HMDB00462	204			1	1.02	1.02		0.9608	0.4067	0.8864	0.5819	0.8922	0.6726	0.781	0.5988		1.0281	1.0235	1.0449		100	100	100		Nucleotide	Purine Metabolism, (Hypo)Xanthine/Inosine containing	1002	97-59-6	1672	157.037
	3331		Purine Metabolism, Adenine containing	adenosine	LC/MS neg	555	C00212	HMDB00050	60961			1.26	1.13	0.9		0.0729	0.105	0.025	0.0994	0.1636	0.3417	0.3213	0.4242		0.8565	1.0806	0.9701		100	100	100		Nucleotide	Purine Metabolism, Adenine containing	798	58-61-7	2075.4	134.047
	3332			adenine	LC/MS pos early	554	C00147	HMDB00034	190			0.33	0.42	1.28		0.7582	0.3555	0.5005	0.459	0.9302	0.6879	0.5567	0.517		2.2544	0.7453	0.9543		83	67	83		Nucleotide	Purine Metabolism, Adenine containing	880	73-24-5	2221	136.062
	3337			N1-methyladenosine	LC/MS pos early	15650	C02494	HMDB03331	27476			1.59	1.18	0.74		0.0524	0.0872	0.0179	0.0849	0.3459	0.4498	0.1129	0.2775		0.7308	1.1656	0.8618		33	83	50		Nucleotide	Purine Metabolism, Adenine containing	1242	15763-06-1	2120	282.12
	3347			N6-carbamoylthreonyladenosine	LC/MS neg	35157		HMDB41623	161466			1.1	1.13	1.02		0.2824	0.2042	0.2345	0.3194	0.1359	0.3095	0.7406	0.5909		0.9311	1.0246	1.0485		100	100	100		Nucleotide	Purine Metabolism, Adenine containing	100001415	24719-82-2	2164	411.127
	3356			N6-succinyladenosine	LC/MS neg	48130		HMDB00912	165243			1.13	0.73	0.64		0.7002	0.3406	0.5353	0.4719	0.861	0.6648	0.4291	0.4672		1.1311	1.2789	0.8216		83	83	100		Nucleotide	Purine Metabolism, Adenine containing	100001664	4542-23-8	940	382.1
	3364		Purine Metabolism, Guanine containing	guanosine	LC/MS neg	1573	C00387	HMDB00133	6802			1.99	3.2	1.61		0.0271	0.0744	0.1622	0.2632	0.0082	0.0949	0.1364	0.2995		0.6312	1.2544	2.0197		67	100	100		Nucleotide	Purine Metabolism, Guanine containing	1099	118-00-3	1662	282.084
	3367			7-methylguanine	LC/MS pos early	35114	C02242	HMDB00897	11361			1.2	1.15	0.96		0.0358	0.0798	0.0151	0.0815	0.0462	0.189	0.5775	0.5236		0.9155	1.0978	1.0546		100	100	100		Nucleotide	Purine Metabolism, Guanine containing	100001456	578-76-7	2175	166.072
	3385		Pyrimidine Metabolism, Orotate containing	dihydroorotate	LC/MS polar	601	C00337	HMDB03349	648			1.78	2.87	1.62		0.1522	0.1559	0.3101	0.367	0.0562	0.1992	0.3247	0.4242		0.5435	0.9656	1.5623		33	83	67		Nucleotide	Pyrimidine Metabolism, Orotate containing	923	155-54-4	1910	157.025
	3386			orotate	LC/MS polar	1505	C00295	HMDB00226	967			0.78	0.64	0.83		0.0269	0.0744	0.0989	0.2185	0.0084	0.0949	0.2214	0.3659		1.3411	1.0412	0.8636		100	100	100		Nucleotide	Pyrimidine Metabolism, Orotate containing	445	50887-69-9	1638.1	155.01
	3388			orotidine	LC/MS polar	35172		HMDB00788	92751			1.04	0.98	0.94		0.7657	0.3571	0.615	0.5029	0.8433	0.6561	0.4857	0.4911		1.008	1.0457	0.9838		100	100	100		Nucleotide	Pyrimidine Metabolism, Orotate containing	100001416	314-50-1	2250	287.052
	3398		Pyrimidine Metabolism, Uracil containing	uridine	LC/MS neg	606	C00299	HMDB00296	6029			0.86	0.45	0.53		0.0915	0.1197	0.1789	0.2765	0.0323	0.1578	0.358	0.4386		1.8399	1.587	0.8344		100	100	100		Nucleotide	Pyrimidine Metabolism, Uracil containing	535	58-96-8	1457.6	243.062
	3399			uracil	LC/MS pos early	605	C00106	HMDB00300	1174			1.11	0.73	0.66		0.5488	0.3019	0.4116	0.42	0.8351	0.6521	0.3075	0.4197		1.2376	1.3763	0.9094		100	100	100		Nucleotide	Pyrimidine Metabolism, Uracil containing	825	66-22-8	827	113.035
	3400			pseudouridine	LC/MS neg	33442	C02067	HMDB00767	15047			1.15	1.24	1.07		0.0094	0.0468	0.03	0.1089	0.0031	0.0553	0.2788	0.4049		0.9017	1.0385	1.1148		100	100	100		Nucleotide	Pyrimidine Metabolism, Uracil containing	821	1445-07-4	1100	243.062
	3401			5,6-dihydrouridine	LC/MS neg	61833			94312			1.18	1.22	1.03		0.024	0.0727	0.0271	0.1044	0.0114	0.0949	0.6709	0.5615		0.9204	1.0852	1.1224		100	100	100		Nucleotide	Pyrimidine Metabolism, Uracil containing	100001425	5627-05-04	1119	245.078
	3402			2'-O-methyluridine	LC/MS neg	57655			102212			0.83	1.03	1.24		0.6513	0.3284	0.5226	0.4697	0.8013	0.6446	0.3768	0.4522		0.9396	0.7779	0.9644		67	33	83		Nucleotide	Pyrimidine Metabolism, Uracil containing	100010896	2140-76-3	1831	257.078
	3410			5,6-dihydrouracil	LC/MS neg	1559	C00429	HMDB00076	649			0.71	0.89	1.27		0.496	0.2873	0.2616	0.3378	0.7705	0.639	0.3983	0.4562		1.067	0.7527	0.9535		100	50	100		Nucleotide	Pyrimidine Metabolism, Uracil containing	1125	504-07-4	1120	113.036
	3414			2'-deoxyuridine	LC/MS neg	1412	C00526	HMDB00012	13712			0.91	0.84	0.93		0.1957	0.1674	0.3571	0.3923	0.0756	0.223	0.3529	0.4367		1.1429	1.0359	0.96		100	100	100		Nucleotide	Pyrimidine Metabolism, Uracil containing	536	951-78-0	1586	111.02
	3417			3-ureidopropionate	LC/MS pos early	3155	C02642	HMDB00026	111			0.98	0.8	0.82		0.1977	0.1675	0.9555	0.5939	0.1146	0.2836	0.1264	0.289		1.16	1.1368	0.9289		100	100	100		Nucleotide	Pyrimidine Metabolism, Uracil containing	1053	462-88-4	875	133.061
	3418			beta-alanine	LC/MS pos early	55	C00099	HMDB00056	239			1.26	0.92	0.73		0.3473	0.2308	0.2877	0.3474	0.7395	0.6368	0.1701	0.3217		1.0791	1.3611	0.9913		100	100	100		Nucleotide	Pyrimidine Metabolism, Uracil containing	244	56-41-7;107-95-9	1905	90.055
	3419			N-acetyl-beta-alanine	LC/MS neg	37432	C01073		76406			1.22	1.4	1.15		0.0024	0.02	0.0221	0.0943	0.0007	0.0173	0.1056	0.2663		0.8695	1.0602	1.2179		100	100	100		Nucleotide	Pyrimidine Metabolism, Uracil containing	100002102	3025-95-4	773	130.051
	3424		Pyrimidine Metabolism, Cytidine containing	cytidine 5'-monophosphate (5'-CMP)	LC/MS pos early	2372	C00055	HMDB00095	6131			1.69	1.05	0.62		0.419	0.2599	0.2155	0.3073	0.7779	0.642	0.3304	0.4242		0.8687	1.4668	0.9118		67	100	100		Nucleotide	Pyrimidine Metabolism, Cytidine containing	282	63-37-6	835	324.059
	3428			cytidine	LC/MS pos early	514	C00475	HMDB00089	6175			1.13	0.78	0.69		0.1601	0.1562	0.5362	0.4719	0.1938	0.3632	0.0647	0.2309		1.1785	1.3265	0.9181		100	100	100		Nucleotide	Pyrimidine Metabolism, Cytidine containing	827	65-46-3	2124	244.093
	3431			5-methylcytidine	LC/MS pos early	22119		HMDB00982	92918			1.11	1.14	1.03		0.9644	0.4076	0.806	0.5593	0.8345	0.6521	0.9707	0.6527		0.9053	1.0038	1.0355		67	83	50		Nucleotide	Pyrimidine Metabolism, Cytidine containing	100000763	2140-61-6	2227	258.108
	3432			N4-acetylcytidine	LC/MS neg	35130		HMDB05923	107461			1.45	1.23	0.85		0.049	0.0872	0.0157	0.0815	0.1667	0.3423	0.2236	0.3668		0.8204	1.1895	1.0108		83	100	100		Nucleotide	Pyrimidine Metabolism, Cytidine containing	100001413	3768-18-1	2040	284.089
	3438			2'-deoxycytidine	LC/MS pos early	15949	C00881	HMDB00014	13711			0.89	0.98	1.1		0.6134	0.3197	0.3514	0.3923	0.8223	0.6475	0.4747	0.4887		1.1061	0.9871	1.0884		100	100	100		Nucleotide	Pyrimidine Metabolism, Cytidine containing	100000125	951-77-9	2193	228.098
	3439			2'-O-methylcytidine	LC/MS pos early	57554			150971			1.16	0.97	0.84		0.4234	0.2608	0.3496	0.3923	0.7432	0.6368	0.2134	0.3572		1.0063	1.1644	0.9764		100	100	100		Nucleotide	Pyrimidine Metabolism, Cytidine containing	100010895	2140-72-9	2411	258.108
	3440			5-methyl-2'-deoxycytidine	LC/MS pos early	38159	C03592	HMDB02224	440055			0.77	0.95	1.24		0.0353	0.0798	0.0158	0.0815	0.6324	0.6015	0.0412	0.2024		1.1525	0.8856	1.0969		100	100	100		Nucleotide	Pyrimidine Metabolism, Cytidine containing	100002300	838-07-3	2303	242.114
	3448		Pyrimidine Metabolism, Thymine containing	thymidine	LC/MS pos early	2183	C00214	HMDB00273	5789			0.75	0.91	1.22		0.4403	0.2662	0.2079	0.3031	0.541	0.554	0.5003	0.4982		1.2507	0.9342	1.1408		100	100	100		Nucleotide	Pyrimidine Metabolism, Thymine containing	872	50-89-5	1400	243.098
	3449			thymine	LC/MS neg	604	C00178	HMDB00262	1135			0.99	0.78	0.79		0.7623	0.3561	0.7536	0.5373	0.6794	0.6175	0.47	0.4865		1.3727	1.3655	1.0771		100	100	100		Nucleotide	Pyrimidine Metabolism, Thymine containing	882	65-71-4	1654	125.036
	3457	Cofactors and Vitamins	Nicotinate and Nicotinamide Metabolism	quinolinate	LC/MS polar	1899	C03722	HMDB00232	1066			0.86	0.73	0.85		0.8071	0.3687	0.8305	0.5672	0.5268	0.5503	0.6733	0.5622		1.3045	1.1156	0.9504		100	100	100		Cofactors and Vitamins	Nicotinate and Nicotinamide Metabolism	182	89-00-9	3000	166.015
	3461			nicotinamide	LC/MS pos early	594	C00153	HMDB01406	936			1.57	0.9	0.57		0.4151	0.2595	0.2346	0.3194	0.9059	0.6769	0.281	0.4049		1.081	1.7013	0.9743		100	100	100		Cofactors and Vitamins	Nicotinate and Nicotinamide Metabolism	432	98-92-0	1942	123.055
	3472			nicotinamide N-oxide	LC/MS pos early	39582		HMDB02730	72661			0.91	1.2	1.31		0.5717	0.3077	0.5824	0.4929	0.614	0.5992	0.2985	0.4119		1.0315	0.943	1.2346		100	100	100		Cofactors and Vitamins	Nicotinate and Nicotinamide Metabolism	100002763	1986-81-8	877	139.05
	3473			1-methylnicotinamide	LC/MS pos early	27665	C02918	HMDB00699	10129985			1.07	1.66	1.54		0.0027	0.0218	0.4753	0.453	0.0012	0.025	0.0054	0.1474		0.8709	0.9354	1.4444		100	100	100		Cofactors and Vitamins	Nicotinate and Nicotinamide Metabolism	55	1005-24-9	1940	137.071
	3478			trigonelline (N'-methylnicotinate)	LC/MS pos early	32401	C01004	HMDB00875	5570			0.52	0.63	1.21		0.0308	0.076	0.0105	0.0734	0.0712	0.2154	0.3419	0.4324		1.4967	0.7817	0.9453		100	100	100		Cofactors and Vitamins	Nicotinate and Nicotinamide Metabolism	100001092	535-83-1	1388	138.055
	3480			N1-Methyl-2-pyridone-5-carboxamide	LC/MS pos early	40469	C05842	HMDB04193	69698			0.92	0.83	0.9		0.5521	0.302	0.4291	0.4341	0.3043	0.4322	0.8053	0.6092		1.2143	1.1212	1.0047		100	100	100		Cofactors and Vitamins	Nicotinate and Nicotinamide Metabolism	100001468	701-44-0	1250	153.066
	3481			N1-Methyl-4-pyridone-3-carboxamide	LC/MS pos early	57584	C05843	HMDB04194	440810			1.27	1.3	1.02		0.5795	0.3107	0.3592	0.393	0.385	0.4678	0.9598	0.6509		0.8411	1.0676	1.0915		100	100	100		Cofactors and Vitamins	Nicotinate and Nicotinamide Metabolism	100001469	769-49-3	1260	153.066
	3485		Riboflavin Metabolism	riboflavin (Vitamin B2)	LC/MS neg	1827	C00255	HMDB00244	493570			1.02	1.05	1.02		0.81	0.3689	0.7377	0.5323	0.5233	0.548	0.759	0.5947		0.9706	0.9923	1.0167		100	100	100		Cofactors and Vitamins	Riboflavin Metabolism	500	83-88-5	3160	255.089
	3488		Pantothenate and CoA Metabolism	pantothenate	LC/MS pos early	1508	C00864	HMDB00210	6613			1.05	0.91	0.87		0.6405	0.3261	0.7567	0.5385	0.5409	0.554	0.3615	0.4416		1.0378	1.0918	0.9477		100	100	100		Cofactors and Vitamins	Pantothenate and CoA Metabolism	1024	137-08-6	1667	220.118
	3501		Ascorbate and Aldarate Metabolism	threonate	LC/MS polar	27738	C01620	HMDB00943	151152			1.19	0.94	0.79		0.1644	0.1562	0.1541	0.2575	0.6799	0.6175	0.0738	0.2422		1.0293	1.2286	0.9723		100	100	100		Cofactors and Vitamins	Ascorbate and Aldarate Metabolism	100001022	70753-61-6	2384	135.03
	3504			oxalate (ethanedioate)	LC/MS neg	20694	C00209	HMDB02329	971			0.98	0.84	0.87		0.1551	0.1562	0.7167	0.5268	0.0718	0.2157	0.1379	0.2995		1.0969	1.0697	0.9255		100	100	100		Cofactors and Vitamins	Ascorbate and Aldarate Metabolism	100000841	144-62-7	603	88.988
	3505			gulonate*	LC/MS polar	46957	C00257	HMDB03290	9794176			0.72	0.61	0.84		0.051	0.0872	0.1372	0.2488	0.0168	0.1161	0.2804	0.4049		1.4036	1.014	0.8563		100	100	100		Cofactors and Vitamins	Ascorbate and Aldarate Metabolism	100001586	20246-53-1	2750	195.051
	3507		Tocopherol Metabolism	alpha-tocopherol	LC/MS pos late	1561	C02477	HMDB01893	14985			0.7	0.51	0.73		0.6007	0.3159	0.7858	0.55	0.3356	0.4498	0.4836	0.4903		1.4199	0.9888	0.7179		100	100	83		Cofactors and Vitamins	Tocopherol Metabolism	1105	59-02-9;10191-41-0	2522	430.378
	3521			gamma-tocopherol/beta-tocopherol	LC/MS pos late	52473						0.75	0.78	1.04		0.3494	0.2308	0.222	0.3128	0.2044	0.3718	0.9588	0.6509		1.1496	0.8585	0.8938		100	100	83		Cofactors and Vitamins	Tocopherol Metabolism	100008998		2384	416.364
	3528		Tetrahydrobiopterin Metabolism	biopterin	LC/MS neg	12358	C06313	HMDB00468	445040			0.93	0.87	0.94		0.6179	0.3198	0.6395	0.5042	0.3346	0.4498	0.6115	0.5381		0.9627	0.8909	0.8415		67	67	50		Cofactors and Vitamins	Tetrahydrobiopterin Metabolism	1548	22150-76-1	1398	236.079
	3529			dihydrobiopterin	LC/MS neg	35129	C00268	HMDB00038	1879			0.77	0.84	1.08		0.2989	0.2101	0.1291	0.2423	0.3432	0.4498	0.54	0.5094		1.2123	0.9347	1.014		100	100	100		Cofactors and Vitamins	Tetrahydrobiopterin Metabolism	100001506	6779-87-9	1552.3	194.068
	3543		Hemoglobin and Porphyrin Metabolism	heme	LC/MS pos late	41754	C00032	HMDB03178	26945			1.15	0.99	0.86		0.6032	0.3159	0.3271	0.381	0.5394	0.554	0.7057	0.577		1.0411	1.194	1.0323		100	100	100		Cofactors and Vitamins	Hemoglobin and Porphyrin Metabolism	100001386	14875-96-8	1124	616.176
	3544			bilirubin (Z,Z)	LC/MS pos late	43807	C00486	HMDB00054	5280352			0.33	0.21	0.62		0.3412	0.2294	0.3552	0.3923	0.1537	0.3287	0.5915	0.5288		2.3061	0.768	0.4775		67	67	50		Cofactors and Vitamins	Hemoglobin and Porphyrin Metabolism	1090	635-65-4	1840	585.271
	3545			bilirubin (E,E)*	LC/MS pos late	32586			5315454			0.39	0.34	0.87		0.3399	0.2294	0.2467	0.3286	0.179	0.3519	0.8409	0.6194		1.9026	0.7396	0.6469		67	67	50		Cofactors and Vitamins	Hemoglobin and Porphyrin Metabolism	100001950	114-25-0	1045	585.271
	3547			biliverdin	LC/MS pos late	2137	C00500	HMDB01008	5353439			0.78	0.74	0.95		0.5512	0.302	0.4777	0.4542	0.2913	0.4224	0.7198	0.5826		1.3347	1.0433	0.9931		100	100	100		Cofactors and Vitamins	Hemoglobin and Porphyrin Metabolism	250	55482-27-4;55482-27-4	1016	583.255
	3564		Vitamin A Metabolism	retinol (Vitamin A)	LC/MS pos late	1806	C00473	HMDB00305	445354			0.84	0.71	0.84		0.1696	0.1571	0.4036	0.416	0.0646	0.2093	0.2742	0.4049		1.2952	1.0895	0.9139		100	100	100		Cofactors and Vitamins	Vitamin A Metabolism	498	68-26-8	1636	269.226
	3583		Vitamin B6 Metabolism	pyridoxal	LC/MS pos early	1651	C00250	HMDB01545	1050			0.97	0.88	0.91		0.6415	0.3261	0.9335	0.5898	0.3994	0.4764	0.4461	0.4729		1.0274	0.9933	0.9034		100	100	100		Cofactors and Vitamins	Vitamin B6 Metabolism	491	65-22-5	2343	168.066
	3584			pyridoxate	LC/MS neg	31555	C00847	HMDB00017	6723			0.98	0.78	0.8		0.2912	0.2082	0.7957	0.5542	0.2241	0.3794	0.1464	0.308		1.1752	1.1467	0.9149		100	100	100		Cofactors and Vitamins	Vitamin B6 Metabolism	100001121	82-82-6	2185	182.046
	3586	Xenobiotics	Benzoate Metabolism	hippurate	LC/MS neg	15753	C01586	HMDB00714	464			0.38	0.32	0.85		0.0008	0.0111	0.0012	0.0227	0.0005	0.0143	0.6548	0.5566		2.5042	0.9441	0.8		100	100	100		Xenobiotics	Benzoate Metabolism	100000014	495-69-2	2106.9	178.051
	3592			4-hydroxyhippurate	LC/MS neg	35527		HMDB13678	151012			1.32	1.11	0.84		0.5124	0.2879	0.2554	0.3328	0.551	0.5558	0.5755	0.5236		0.7835	1.0317	0.8712		33	50	67		Xenobiotics	Benzoate Metabolism	100001423	2482-25-9	1475	194.046
	3598			benzoate	LC/MS neg	15778	C00180	HMDB01870	243			0.96	0.71	0.74		0.2176	0.1764	0.6543	0.5075	0.0968	0.2526	0.2085	0.3564		1.01	0.97	0.7187		100	83	67		Xenobiotics	Benzoate Metabolism	100000008	65-85-0	1750	121.029
	3616			catechol sulfate	LC/MS neg	35320		HMDB59724	3083879			0.35	0.66	1.88		0.0016	0.0158	0.0004	0.0111	0.0855	0.2349	0.0181	0.1817		1.6902	0.5908	1.1108		100	67	100		Xenobiotics	Benzoate Metabolism	100001605	4918-96-1	1906	188.986
	3621			4-methylcatechol sulfate	LC/MS neg	46146						0.56	0.26	0.47		0.0004	0.0111	0.0111	0.0734	0.0001	0.0076	0.037	0.1966		1.0463	0.5816	0.2739		100	50	17		Xenobiotics	Benzoate Metabolism	100004111		2665	203.002
	3653			p-cresol sulfate	LC/MS neg	36103		HMDB11635	4615423			1.14	0.28	0.25		0.0222	0.0727	0.6459	0.5042	0.0103	0.0949	0.0264	0.1893		1.2056	1.3729	0.3393		100	100	100		Xenobiotics	Benzoate Metabolism	100001315	3233-57-7	2890	187.007
	3664			3-(3-hydroxyphenyl)propionate sulfate	LC/MS neg	45415			187488			0.81	0.92	1.14		0.6953	0.3402	0.6029	0.4976	0.7512	0.6386	0.4063	0.4619		1.0642	0.8657	0.9837		83	83	100		Xenobiotics	Benzoate Metabolism	100005391	86321-32-6	1294	245.013
	3786		Food Component/Plant	2,3-dihydroxyisovalerate	LC/MS polar	38276	C04039	HMDB12141	677			0.57	0.71	1.24		0.0199	0.0706	0.0064	0.0563	0.0622	0.2084	0.2671	0.3998		1.2145	0.6891	0.8567		100	67	67		Xenobiotics	Food Component/Plant	100002417	1756-18-9	1050	133.051
	3816			gluconate	LC/MS polar	587	C00257	HMDB00625	10690			0.9	0.73	0.81		0.6701	0.3325	0.767	0.5437	0.3867	0.4678	0.5641	0.5185		1.2688	1.1444	0.9291		100	100	100		Xenobiotics	Food Component/Plant	338	527-07-1	2922	195.051
	3876			genistein sulfate*	LC/MS neg	62061						0.09	0.07	0.8		5.6159e-06	0.0007	6.9288e-06	0.0006	6.8311e-06	0.0014	0.9935	0.6601		1.6193	0.1466	0.1176		100	50	33		Xenobiotics	Food Component/Plant	100020207		3616	349.002
	3888			equol sulfate	LC/MS neg	40478						4.44	7.57	1.7		0.0008	0.0111	0.0131	0.0781	0.0002	0.0094	0.0579	0.2247		0.1388	0.6164	1.0509		0	83	100		Xenobiotics	Food Component/Plant	100003429		3630	321.044
	3889			ergothioneine	LC/MS pos early	37459	C05570	HMDB03045	3032311			2.17	0.95	0.44		0.1347	0.1472	0.0724	0.1956	0.8736	0.666	0.097	0.2565		0.7894	1.7122	0.7475		100	100	83		Xenobiotics	Food Component/Plant	100002154	58511-63-0	850	230.096
	3915			homostachydrine*	LC/MS pos early	33009	C08283	HMDB33433	441447			0.54	0.82	1.54		0.0382	0.0828	0.0169	0.0831	0.6314	0.6015	0.0442	0.2121		1.261	0.6752	1.0401		100	100	100		Xenobiotics	Food Component/Plant	100001550	1195-94-4	1750	158.118
	3941			methyl indole-3-acetate	LC/MS pos early	1584		HMDB29738	74706			0.81	0.97	1.19		0.754	0.3542	0.5369	0.4719	0.9628	0.6945	0.5072	0.5		0.704	0.5715	0.6803		67	33	67		Xenobiotics	Food Component/Plant	1104	1912-33-0	3380	190.086
	3950			N-glycolylneuraminate	LC/MS polar	37123	C03410	HMDB00833	123802			1.11	1.18	1.06		0.906	0.3936	0.847	0.5719	0.8072	0.6446	0.6628	0.5566		1.0336	1.1512	1.2149		67	67	83		Xenobiotics	Food Component/Plant	100001491	1113-83-3	3327.5	324.094
	4006			stachydrine	LC/MS pos early	34384	C10172	HMDB04827	115244			0.51	0.83	1.63		0.0239	0.0727	0.011	0.0734	0.641	0.6028	0.0284	0.1893		1.4565	0.7456	1.215		100	100	100		Xenobiotics	Food Component/Plant	100001296	4136-37-2	1440	144.102
	4030			methyl glucopyranoside (alpha + beta)	LC/MS neg	46144						0.9	1.03	1.14		0.0426	0.0839	0.0469	0.1404	0.6549	0.6103	0.0193	0.1848		1.0369	0.9327	1.0664		100	100	100		Xenobiotics	Food Component/Plant	100005864		1070	193.072
	4060			daidzein sulfate (2)	LC/MS neg	48728						0.11	0.07	0.58		1.3492e-07	3.3469e-05	4.1619e-07	0.0002	9.9603e-08	4.1305e-05	0.3311	0.4242		1.2199	0.138	0.0804		100	17	17		Xenobiotics	Food Component/Plant	100006363		3330	333.008
	4133		Bacterial/Fungal	tartronate (hydroxymalonate)	LC/MS neg	20693	C02287	HMDB35227	45			0.57	0.56	0.99		0.0384	0.0828	0.0245	0.0986	0.0272	0.1445	0.9584	0.6509		1.672	0.949	0.9405		100	100	100		Xenobiotics	Bacterial/Fungal	100000840	80-69-3	610	118.999
	4568		Chemical	sulfate*	LC/MS neg	46960	C00059	HMDB01448	1118			1.07	1.04	0.97		0.4443	0.2675	0.2103	0.3047	0.5146	0.5448	0.5309	0.5094		0.9571	1.0222	0.9924		100	100	100		Xenobiotics	Chemical	100002528	14808-79-8	616	96.9601
	4571			O-sulfo-L-tyrosine	LC/MS neg	45413			514186			1.58	1.06	0.67		0.0115	0.052	0.0055	0.0536	0.6368	0.6015	0.0147	0.1692		0.8551	1.3477	0.9088		100	100	100		Xenobiotics	Chemical	100005384		990	260.023
	4573			1-(3-aminopropyl)-2-pyrrolidone	LC/MS pos early	40506			82111			1.41	0.97	0.69		0.1584	0.1562	0.1013	0.2185	0.9626	0.6945	0.0931	0.2508		0.8992	1.2638	0.8726		100	100	100		Xenobiotics	Chemical	100003263	7663-77-6	2420	143.118
	4575			ethyl glucuronide	LC/MS neg	39603		HMDB10325	152226			0.67	0.48	0.71		0.1539	0.1559	0.3093	0.367	0.057	0.1992	0.3288	0.4242		1.9599	1.3192	0.9408		100	100	100		Xenobiotics	Chemical	100002849	17685-04-0	793	221.067
	4618			S-(3-hydroxypropyl)mercapturic acid (HPMA)	LC/MS neg	44552			3371179			0.85	1.08	1.27		0.7041	0.3418	0.4371	0.4398	0.8805	0.67	0.5284	0.5094		1.053	0.896	1.1381		100	100	100		Xenobiotics	Chemical	100004568	23127-40-4	1576	220.065
	4643			HEPES	LC/MS neg	21248			23831			1	1	1		1	0.4176	1	0.6098	1	0.6982	1	0.6622		1	1	1		17	0	0		Xenobiotics	Chemical	100000843	7365-45-9	1022	237.091
	4664			perfluorooctanesulfonic acid (PFOS)	LC/MS polar	57564	C18142	HMDB59586	74483			0.58	0.65	1.12		1.3917e-05	0.0007	6.1117e-06	0.0006	6.9308e-05	0.0057	0.1952	0.3443		1.5154	0.8728	0.9803		100	100	100		Xenobiotics	Chemical	100010955	1763-23-1	662	498.93
	4677			trizma acetate	LC/MS pos early	20710	C07182		6503			0.07	0.04	0.58		0.4385	0.266	0.377	0.4041	0.2189	0.3794	0.7145	0.5826		17.05	1.1343	0.6616		67	67	50		Xenobiotics	Chemical	100000856	6850-28-8	1884	122.081
	4680			MOPS	LC/MS neg	47137			70807;2723950			0.04	0.01	0.18		0.472	0.2788	0.6774	0.5176	0.2352	0.3884	0.4293	0.4672		111.83	4.3255	0.7709		83	50	17		Xenobiotics	Chemical	100005863	1132-61-2	1532	208.065
	4684			4-hydroxychlorothalonil	LC/MS neg	48441			34217			0.6	0.79	1.33		0.0593	0.0925	0.0195	0.0873	0.1756	0.3501	0.2509	0.3885		1.1325	0.6742	0.897		100	67	67		Xenobiotics	Chemical	100006082	28343-61-5	4427	244.908
	4701			6-hydroxyindole sulfate	LC/MS neg	48698						0.96	0.77	0.8		0.1703	0.1571	0.8285	0.5672	0.0871	0.2362	0.1283	0.2916		1.0761	1.036	0.8268		100	100	100		Xenobiotics	Chemical	100006260		2498	212.002
	4705			thioproline	LC/MS pos early	53231			93176			3.06	1.56	0.51		0.0006	0.0111	0.0001	0.0071	0.0476	0.189	0.0109	0.1479		0.563	1.7226	0.8776		33	100	83		Xenobiotics	Chemical	100009232	34592-47-4	1250	134.027
	3385		Pyrimidine Metabolism, Orotate containing	dihydroorotate	LC/MS polar	601	C00337	HMDB03349	648			0.88	0.65	0.74		0.4301	0.1897	0.7338	0.4468	0.2162	0.2131	0.3598	0.4885		1.3136	1.1585	0.8594		100	83	83		Nucleotide	Pyrimidine Metabolism, Orotate containing	923	155-54-4	1910	157.025
	3386			orotate	LC/MS polar	1505	C00295	HMDB00226	967			1.08	0.86	0.79		0.642	0.2402	0.9868	0.5305	0.4256	0.3053	0.4164	0.5292		1.2163	1.3184	1.048		100	100	100		Nucleotide	Pyrimidine Metabolism, Orotate containing	445	50887-69-9	1638.1	155.01
	3388			orotidine	LC/MS polar	35172		HMDB00788	92751			1.02	6.93	6.8		0.0388	0.039	0.8939	0.5057	0.0299	0.0584	0.0229	0.0921		0.9119	0.9294	6.3201		100	100	100		Nucleotide	Pyrimidine Metabolism, Orotate containing	100001416	314-50-1	2250	287.052
	3393		Pyrimidine Metabolism, Uracil containing	uridine 5'-monophosphate (UMP)	LC/MS polar	2856	C00105	HMDB00288	6030			0.79	0.99	1.26		0.7069	0.2553	0.4175	0.3249	0.6091	0.3679	0.7597	0.6646		1.3258	1.0453	1.3147		100	100	100		Nucleotide	Pyrimidine Metabolism, Uracil containing	869	3387-36-8	4150	323.029
	3395			uridine 3'-monophosphate (3'-UMP)	LC/MS neg	39764	C01368		101543			2.39	3.43	1.44		0.009	0.0137	0.0771	0.1238	0.0025	0.0096	0.1062	0.2697		0.3784	0.9033	1.2966		50	67	100		Nucleotide	Pyrimidine Metabolism, Uracil containing	106	35170-0-7;35170-03-7	750	323.029
	3397			uridine-2',3'-cyclic monophosphate	LC/MS neg	37137	C02355	HMDB11640	439715			1.3	3.7	2.84		0.0004	0.0014	0.235	0.2367	0.0002	0.0011	0.0019	0.019		0.7021	0.916	2.5974		100	100	100		Nucleotide	Pyrimidine Metabolism, Uracil containing	75	40632-52-8	1090	305.018
	3398			uridine	LC/MS neg	606	C00299	HMDB00296	6029			0.95	0.68	0.72		0.003	0.0058	0.613	0.4068	0.0015	0.0066	0.0044	0.0327		1.118	1.0635	0.7656		100	100	100		Nucleotide	Pyrimidine Metabolism, Uracil containing	535	58-96-8	1457.6	243.062
	3399			uracil	LC/MS pos early	605	C00106	HMDB00300	1174			0.81	0.69	0.85		0.1027	0.0765	0.2266	0.2337	0.036	0.0681	0.3139	0.4622		1.2573	1.0216	0.8697		100	100	100		Nucleotide	Pyrimidine Metabolism, Uracil containing	825	66-22-8	827	113.035
	3400			pseudouridine	LC/MS neg	33442	C02067	HMDB00767	15047			0.7	0.61	0.87		0.0292	0.0317	0.0955	0.1398	0.0092	0.0257	0.2458	0.425		1.3163	0.9276	0.8093		100	100	100		Nucleotide	Pyrimidine Metabolism, Uracil containing	821	1445-07-4	1100	243.062
	3401			5,6-dihydrouridine	LC/MS neg	61833			94312			0.9	0.71	0.79		0.1352	0.0911	0.6621	0.4248	0.0597	0.0958	0.1324	0.3126		1.136	1.023	0.8058		100	100	100		Nucleotide	Pyrimidine Metabolism, Uracil containing	100001425	5627-05-04	1119	245.078
	3402			2'-O-methyluridine	LC/MS neg	57655			102212			0.39	0.49	1.28		0.0103	0.0149	0.0067	0.0274	0.0089	0.0253	0.891	0.6973		1.8662	0.72	0.9225		100	100	83		Nucleotide	Pyrimidine Metabolism, Uracil containing	100010896	2140-76-3	1831	257.078
	3403			5-methyluridine (ribothymidine)	LC/MS neg	35136		HMDB00884	445408			1.13	0.77	0.68		0.0968	0.0739	0.4734	0.3498	0.1404	0.1641	0.0368	0.1287		1.0096	1.1363	0.7757		100	100	100		Nucleotide	Pyrimidine Metabolism, Uracil containing	100001446	1463-10-1	1778.1	257.078
	3414			2'-deoxyuridine	LC/MS neg	52602	C00526	HMDB00012	13712			0.47	0.6	1.26		0.0343	0.0357	0.0148	0.0447	0.0426	0.0762	0.5985	0.6202		1.7523	0.8277	1.0436		100	100	100		Nucleotide	Pyrimidine Metabolism, Uracil containing	536	951-78-0	1586	227.067
	3417			3-ureidopropionate	LC/MS pos early	3155	C02642	HMDB00026	111			0.82	0.65	0.8		0.4399	0.1918	0.4749	0.3498	0.2084	0.2103	0.5694	0.6086		1.3627	1.12	0.8906		100	100	100		Nucleotide	Pyrimidine Metabolism, Uracil containing	1053	462-88-4	875	133.061
	3418			beta-alanine	LC/MS pos early	55	C00099	HMDB00056	239			0.73	1.28	1.74		0.0516	0.0471	0.1191	0.1548	0.3247	0.2627	0.0174	0.0781		1.076	0.7895	1.3773		100	100	100		Nucleotide	Pyrimidine Metabolism, Uracil containing	244	56-41-7;107-95-9	1905	90.055
	3424		Pyrimidine Metabolism, Cytidine containing	cytidine 5'-monophosphate (5'-CMP)	LC/MS pos early	2372	C00055	HMDB00095	6131			0.56	0.74	1.32		0.1603	0.1031	0.07	0.1185	0.1593	0.177	0.6455	0.6231		1.6024	0.9025	1.193		100	100	100		Nucleotide	Pyrimidine Metabolism, Cytidine containing	282	63-37-6	835	324.059
	3426			cytidine 2' or 3'-monophosphate (2' or 3'-CMP)	LC/MS neg	61705						1.61	2.41	1.49		0.0381	0.0386	0.2188	0.2296	0.012	0.031	0.1364	0.3152		0.4754	0.7672	1.1466		0	50	100		Nucleotide	Pyrimidine Metabolism, Cytidine containing	100019915		708	322.045
	3427			cytidine 2',3'-cyclic monophosphate	LC/MS neg	37465	C02354	HMDB11691	417654			1.47	8.52	5.81		3.4387e-05	0.0002	0.1773	0.2025	1.3659e-05	0.0002	0.0002	0.006		0.5776	0.8467	4.9189		83	100	100		Nucleotide	Pyrimidine Metabolism, Cytidine containing	73	15718-51-1	937	304.034
	3428			cytidine	LC/MS pos early	514	C00475	HMDB00089	6175			0.86	0.8	0.92		0.3757	0.1753	0.5016	0.3609	0.1689	0.1828	0.4608	0.5565		1.1081	0.9566	0.8826		100	100	100		Nucleotide	Pyrimidine Metabolism, Cytidine containing	827	65-46-3	2124	244.093
	3429			cytosine	LC/MS pos early	573	C00380	HMDB00630	597			1.68	1.12	0.67		0.3791	0.1765	0.3657	0.3056	0.6363	0.3769	0.1773	0.3553		0.9718	1.6291	1.0888		100	100	100		Nucleotide	Pyrimidine Metabolism, Cytidine containing	881	71-30-7	2060	112.051
	3431			5-methylcytidine	LC/MS pos early	22119		HMDB00982	92918			0.4	0.41	1.03		0.0136	0.0182	0.0106	0.0378	0.0094	0.0259	0.9529	0.7125		1.3406	0.5378	0.5516		100	50	83		Nucleotide	Pyrimidine Metabolism, Cytidine containing	100000763	2140-61-6	2227	258.108
	3436			2'-deoxycytidine 5'-monophosphate	LC/MS pos early	533	C00239	HMDB01202	13945			0.3	0.94	3.17		0.0481	0.0454	0.0163	0.0474	0.3299	0.264	0.11	0.2754		1.5757	0.4656	1.4769		100	100	100		Nucleotide	Pyrimidine Metabolism, Cytidine containing	298	1032-65-1	975	308.064
	3438			2'-deoxycytidine	LC/MS pos early	15949	C00881	HMDB00014	13711			0.43	0.85	1.95		0.1427	0.0945	0.0523	0.0988	0.2809	0.2455	0.3386	0.4805		1.4702	0.6365	1.2431		100	100	100		Nucleotide	Pyrimidine Metabolism, Cytidine containing	100000125	951-77-9	2193	228.098
	3439			2'-O-methylcytidine	LC/MS pos early	57554			150971			0.45	0.44	0.96		0.0213	0.0252	0.0465	0.0935	0.0075	0.0221	0.3725	0.4951		1.8226	0.8292	0.7994		100	100	100		Nucleotide	Pyrimidine Metabolism, Cytidine containing	100010895	2140-72-9	2411	258.108
	3440			5-methyl-2'-deoxycytidine	LC/MS pos early	38159	C03592	HMDB02224	440055			0.46	1.03	2.27		0.0278	0.0307	0.0132	0.0415	0.6782	0.3922	0.0306	0.1135		1.3046	0.5938	1.3482		100	100	83		Nucleotide	Pyrimidine Metabolism, Cytidine containing	100002300	838-07-3	2303	242.114
	3444		Pyrimidine Metabolism, Thymine containing	thymidine 5'-monophosphate	LC/MS neg	12023	C00364	HMDB01227	9700			0.41	1.5	3.7		0.0175	0.0215	0.0209	0.0535	0.6532	0.3833	0.0083	0.047		1.529	0.6197	2.2911		100	100	100		Nucleotide	Pyrimidine Metabolism, Thymine containing	1248	33430-62-5	883	321.049
	3448			thymidine	LC/MS neg	2183	C00214	HMDB00273	5789			0.55	0.95	1.72		0.0405	0.0399	0.0164	0.0475	0.5424	0.3447	0.0554	0.1674		1.3278	0.7345	1.2615		100	100	100		Nucleotide	Pyrimidine Metabolism, Thymine containing	872	50-89-5	1963.7	241.083
	3449			thymine	LC/MS neg	604	C00178	HMDB00262	1135			0.87	0.92	1.06		0.8299	0.2799	0.619	0.4079	0.588	0.3615	0.964	0.7155		1.0906	0.9494	1.0078		100	100	100		Nucleotide	Pyrimidine Metabolism, Thymine containing	882	65-71-4	1654	125.036
	3453		Purine and Pyrimidine Metabolism	methylphosphate	LC/MS pos early	37070		HMDB61711	13130			0.68	0.58	0.85		0.1523	0.0996	0.3274	0.2916	0.0563	0.0925	0.3077	0.4583		1.4408	0.9755	0.8329		100	100	100		Nucleotide	Purine and Pyrimidine Metabolism	100001805	7023-27-0	544	113
	3457	Cofactors and Vitamins	Nicotinate and Nicotinamide Metabolism	quinolinate	LC/MS pos early	1899	C03722	HMDB00232	1066			0.63	1.09	1.72		0.0156	0.02	0.0204	0.0531	0.6084	0.3679	0.0071	0.0453		1.2171	0.768	1.3217		100	100	100		Cofactors and Vitamins	Nicotinate and Nicotinamide Metabolism	182	89-00-9	845	168.029
	3458			nicotinate	LC/MS pos early	1504	C00253	HMDB01488	938			1.04	1.07	1.03		0.9452	0.3055	0.8307	0.483	0.7453	0.412	0.9112	0.7022		1.0125	1.0534	1.085		100	100	100		Cofactors and Vitamins	Nicotinate and Nicotinamide Metabolism	567	59-67-6	1673	124.039
	3459			nicotinate ribonucleoside	LC/MS pos early	33471	C05841	HMDB06809	161234			0.6	1.45	2.44		0.2633	0.1411	0.1186	0.1548	0.6516	0.3833	0.2507	0.4251		1.2082	0.7189	1.7518		100	83	100		Cofactors and Vitamins	Nicotinate and Nicotinamide Metabolism	100001316	2625-49-2	1536	256.082
	3461			nicotinamide	LC/MS pos early	594	C00153	HMDB01406	936			0.59	1.39	2.37		0.1057	0.0777	0.0992	0.1411	0.701	0.398	0.0484	0.1498		1.2253	0.7181	1.7017		100	100	100		Cofactors and Vitamins	Nicotinate and Nicotinamide Metabolism	432	98-92-0	1942	123.055
	3464			nicotinamide riboside	LC/MS pos early	33013	C03150	HMDB00855	439924			0.63	0.44	0.7		0.224	0.1285	0.3284	0.2916	0.0894	0.1272	0.433	0.5419		1.2453	0.7784	0.5452		83	83	100		Cofactors and Vitamins	Nicotinate and Nicotinamide Metabolism	100001310	1341-23-7	2040	255.098
	3472			nicotinamide N-oxide	LC/MS pos early	39582		HMDB02730	72661			1.97	0.62	0.31		0.3936	0.1803	0.2647	0.2486	0.9096	0.4549	0.222	0.4102		1.2564	2.4769	0.7752		50	67	50		Cofactors and Vitamins	Nicotinate and Nicotinamide Metabolism	100002763	1986-81-8	877	139.05
	3478			trigonelline (N'-methylnicotinate)	LC/MS pos early	32401	C01004	HMDB00875	5570			0.81	1.01	1.24		0.7076	0.2553	0.4142	0.3243	0.7116	0.4005	0.65	0.6231		1.3807	1.1181	1.3898		100	100	100		Cofactors and Vitamins	Nicotinate and Nicotinamide Metabolism	100001092	535-83-1	1388	138.055
	3485		Riboflavin Metabolism	riboflavin (Vitamin B2)	LC/MS pos early	1827	C00255	HMDB00244	493570			0.61	0.63	1.03		0.4789	0.2035	0.344	0.2967	0.2661	0.2394	0.861	0.6916		1.5327	0.9399	0.9675		100	100	100		Cofactors and Vitamins	Riboflavin Metabolism	500	83-88-5	2292	377.146
	3486			flavin adenine dinucleotide (FAD)	LC/MS neg	2134	C00016	HMDB01248	643975			1.43	0.92	0.64		0.1429	0.0945	0.1703	0.1956	0.5494	0.3473	0.058	0.1742		0.9083	1.3	0.8345		100	100	67		Cofactors and Vitamins	Riboflavin Metabolism	327	146-14-5;84366-81-4	2425	784.15
	3487			flavin mononucleotide (FMN)	LC/MS neg	15797	C00061	HMDB01520	710			2.06	2.34	1.14		0.0285	0.0312	0.0235	0.0576	0.0166	0.0384	0.8637	0.6927		0.6257	1.2862	1.4662		100	100	100		Cofactors and Vitamins	Riboflavin Metabolism	100000251	130-40-5	2390	455.097
	3488		Pantothenate and CoA Metabolism	pantothenate	LC/MS pos early	1508	C00864	HMDB00210	6613			0.73	0.78	1.07		0.1224	0.0853	0.0678	0.1153	0.0858	0.1242	0.8987	0.6978		1.2438	0.9059	0.9698		100	100	100		Cofactors and Vitamins	Pantothenate and CoA Metabolism	1024	137-08-6	1667	220.118
	3501		Ascorbate and Aldarate Metabolism	threonate	LC/MS polar	27738	C01620	HMDB00943	151152			0.56	0.63	1.12		0.0855	0.0682	0.0435	0.091	0.0699	0.1086	0.8035	0.6775		1.6753	0.9426	1.0539		100	100	100		Cofactors and Vitamins	Ascorbate and Aldarate Metabolism	100001022	70753-61-6	2384	135.03
	3504			oxalate (ethanedioate)	LC/MS neg	20694	C00209	HMDB02329	971			0.63	1.09	1.73		0.0132	0.018	0.013	0.0415	0.7889	0.4239	0.0075	0.0453		1.1	0.6932	1.2016		100	100	100		Cofactors and Vitamins	Ascorbate and Aldarate Metabolism	100000841	144-62-7	603	88.988
	3505			gulonate*	LC/MS polar	46957	C00257	HMDB03290	9794176			0.57	0.8	1.41		0.3578	0.1698	0.1586	0.1861	0.4897	0.3256	0.45	0.5513		1.6775	0.9495	1.3365		100	100	100		Cofactors and Vitamins	Ascorbate and Aldarate Metabolism	100001586	20246-53-1	2750	195.051
	3507		Tocopherol Metabolism	alpha-tocopherol	LC/MS pos late	1561	C02477	HMDB01893	14985			0.92	0.69	0.76		0.0632	0.0541	0.6104	0.4067	0.0269	0.0545	0.0725	0.2059		1.1085	1.0164	0.7686		100	100	100		Cofactors and Vitamins	Tocopherol Metabolism	1105	59-02-9;10191-41-0	2522	430.378
	3508			alpha-tocopherol acetate	LC/MS pos late	38288	C13202	HMDB34227	2117			0.85	0.9	1.07		0.8717	0.2888	0.6072	0.4065	0.7721	0.4194	0.8211	0.6821		1.2222	1.033	1.1038		100	100	100		Cofactors and Vitamins	Tocopherol Metabolism	100002328	7695-31-2	2702	490.425
	3511			delta-tocopherol	LC/MS pos late	33418	C14151	HMDB02902	92094			0.8	0.77	0.97		0.7269	0.2582	0.5146	0.3674	0.4785	0.3237	0.9534	0.7125		1.2351	0.985	0.955		100	100	100		Cofactors and Vitamins	Tocopherol Metabolism	100001216	119-13-1	2259	402.349
	3513			alpha-tocotrienol	LC/MS pos late	37502	C14153	HMDB06327	5282347			0.57	0.51	0.9		0.0769	0.0627	0.0638	0.1105	0.0392	0.0717	0.8	0.6775		1.1896	0.6741	0.6095		83	50	50		Cofactors and Vitamins	Tocopherol Metabolism	100001979	58864-81-6	1986	424.334
	3514			gamma-tocotrienol	LC/MS pos late	37501	C14155	HMDB12958	5282349			1.03	1.26	1.23		0.7698	0.2664	0.7339	0.4468	0.477	0.3237	0.707	0.6437		0.9016	0.9245	1.1338		83	100	100		Cofactors and Vitamins	Tocopherol Metabolism	100001981	14101-61-2	1918	410.318
	3521			gamma-tocopherol/beta-tocopherol	LC/MS pos late	52473						0.83	0.75	0.9		0.3211	0.1595	0.4014	0.3189	0.1388	0.1628	0.4949	0.5695		1.137	0.9475	0.8567		100	100	100		Cofactors and Vitamins	Tocopherol Metabolism	100008998		2384	416.364
	3528		Tetrahydrobiopterin Metabolism	biopterin	LC/MS neg	12358	C06313	HMDB00468	445040			0.67	0.93	1.38		0.1953	0.1167	0.0791	0.1256	0.5149	0.3348	0.2425	0.4243		1.1992	0.8035	1.1098		100	100	100		Cofactors and Vitamins	Tetrahydrobiopterin Metabolism	1548	22150-76-1	1398	236.079
	3542		Hemoglobin and Porphyrin Metabolism	protoporphyrin IX	LC/MS pos late	39321	C02191	HMDB00241	4971			0.79	0.37	0.46		0.0018	0.0041	0.3744	0.3083	0.0007	0.0036	0.0047	0.0339		1.5717	1.2412	0.574		100	100	100		Cofactors and Vitamins	Hemoglobin and Porphyrin Metabolism	100000292	553-12-8;50865-10-5	1417	563.265
	3543			heme	LC/MS pos late	41754	C00032	HMDB03178	26945			1.34	1.07	0.8		0.7287	0.2582	0.4692	0.3483	0.9184	0.4565	0.5329	0.5971		0.9328	1.2494	0.9982		100	100	100		Cofactors and Vitamins	Hemoglobin and Porphyrin Metabolism	100001386	14875-96-8	1124	616.176
	3544			bilirubin (Z,Z)	LC/MS pos late	43807	C00486	HMDB00054	5280352			0.14	0.4	2.9		2.038e-06	2.865e-05	4.4897e-07	3.8439e-05	0.0007	0.0036	0.0008	0.0106		2.5301	0.345	0.9994		100	100	100		Cofactors and Vitamins	Hemoglobin and Porphyrin Metabolism	1090	635-65-4	1840	585.271
	3545			bilirubin (E,E)*	LC/MS pos late	32586			5315454			0.14	0.4	2.95		0.0545	0.0485	0.0176	0.0498	0.1922	0.1998	0.2133	0.4011		3.3316	0.4508	1.3292		83	100	100		Cofactors and Vitamins	Hemoglobin and Porphyrin Metabolism	100001950	114-25-0	1045	585.271
	3546			bilirubin (E,Z or Z,E)*	LC/MS pos late	47886		HMDB00488	5799469			0.08	0.28	3.65		0.0002	0.0006	3.6478e-05	0.0006	0.0071	0.0211	0.0178	0.0788		4.4812	0.3386	1.2352		100	100	83		Cofactors and Vitamins	Hemoglobin and Porphyrin Metabolism	100001951		1265	585.271
	3547			biliverdin	LC/MS pos late	2137	C00500	HMDB01008	5353439			0.18	0.47	2.65		3.6184e-05	0.0002	8.3827e-06	0.0002	0.0033	0.0119	0.007	0.0453		2.6962	0.4748	1.2596		100	100	100		Cofactors and Vitamins	Hemoglobin and Porphyrin Metabolism	250	55482-27-4;55482-27-4	1016	583.255
	3548			I-urobilinogen	LC/MS neg	32426	C05790	HMDB04157	26818			3.91	4.66	1.19		0.1403	0.0939	0.2035	0.2183	0.0537	0.0904	0.4569	0.5544		0.2322	0.9089	1.0829		33	67	83		Cofactors and Vitamins	Hemoglobin and Porphyrin Metabolism	100001226	14684-37-8	4190	591.319
	3549			D-urobilin	LC/MS pos late	40084	C05795	HMDB04161	6276321			0.57	1	1.76		0.1871	0.1143	0.6805	0.4289	0.0843	0.1226	0.1736	0.3533		1.3628	0.7746	1.3657		33	100	100		Cofactors and Vitamins	Hemoglobin and Porphyrin Metabolism	100002569	3947-38-4	935	589.302
	3550			L-urobilin	LC/MS neg	40173	C05793	HMDB04159	5280818			5.38	10.11	1.88		0.0119	0.0165	0.0066	0.0274	0.0121	0.031	0.771	0.6688		0.1776	0.9555	1.7962		0	100	83		Cofactors and Vitamins	Hemoglobin and Porphyrin Metabolism	100002568	34217-90-8	4624	593.334
	3556		Thiamine Metabolism	thiamin (Vitamin B1)	LC/MS pos early	5341	C00378	HMDB00235	1130			0.81	0.72	0.89		0.1047	0.0772	0.1931	0.2115	0.0376	0.0703	0.3734	0.4951		1.2532	1.0125	0.8976		100	100	100		Cofactors and Vitamins	Thiamine Metabolism	873	59-43-8	3050	265.112
	3557			thiamin monophosphate	LC/MS neg	15798	C01081	HMDB02666	3382778			1.45	1.94	1.33		0.1094	0.0796	0.2258	0.2337	0.0389	0.0714	0.3331	0.4767		0.7596	1.1031	1.4707		67	100	100		Cofactors and Vitamins	Thiamine Metabolism	523	532-40-1	1448	343.064
	3566		Vitamin A Metabolism	carotene diol (1)	LC/MS pos late	57635						0.62	0.65	1.04		0.1908	0.1151	0.1023	0.1434	0.1341	0.1622	0.8781	0.6973		1.395	0.8714	0.9063		100	100	100		Cofactors and Vitamins	Vitamin A Metabolism	100015966		1720	568.428
	3567			carotene diol (2)	LC/MS pos late	57636						0.64	0.8	1.26		0.2116	0.1226	0.088	0.1349	0.5504	0.3473	0.2435	0.4246		1.2963	0.8233	1.0374		100	100	100		Cofactors and Vitamins	Vitamin A Metabolism	100015967		1904	568.428
	3568			carotene diol (3)	LC/MS pos late	57637						0.67	0.76	1.14		0.3844	0.1779	0.1799	0.2047	0.6308	0.375	0.374	0.4951		1.321	0.8848	1.0099		100	100	100		Cofactors and Vitamins	Vitamin A Metabolism	100015968		1948	568.428
	3570			beta-cryptoxanthin	LC/MS pos late	57591		HMDB33844	6384256			0.37	0.38	1.02		0.0104	0.0149	0.0062	0.0265	0.0099	0.0268	0.8244	0.6837		2.0637	0.7564	0.7745		100	83	100		Cofactors and Vitamins	Vitamin A Metabolism	100001977	472-70-8	2560	552.433
	3580		Vitamin B6 Metabolism	pyridoxamine	LC/MS pos early	2150	C00534	HMDB01431	1052			1.57	1.23	0.78		0.0757	0.062	0.0275	0.065	0.4179	0.3041	0.1287	0.3071		0.8299	1.3057	1.0222		100	100	100		Cofactors and Vitamins	Vitamin B6 Metabolism	568	58052-48-5	2975	169.097
	3583			pyridoxal	LC/MS pos early	1651	C00250	HMDB01545	1050			0.85	0.89	1.05		0.5071	0.2082	0.3095	0.2788	0.3276	0.2628	0.9686	0.7162		1.1556	0.9799	1.0294		100	100	100		Cofactors and Vitamins	Vitamin B6 Metabolism	491	65-22-5	2343	168.066
	3584			pyridoxate	LC/MS neg	31555	C00847	HMDB00017	6723			0.69	1.53	2.2		0.0017	0.0039	0.0607	0.1086	0.0263	0.0539	0.0004	0.0088		1.0323	0.7174	1.5779		100	100	100		Cofactors and Vitamins	Vitamin B6 Metabolism	100001121	82-82-6	2185	182.046
	3598	Xenobiotics	Benzoate Metabolism	benzoate	LC/MS neg	15778	C00180	HMDB01870	243			0.66	0.88	1.34		0.1958	0.1167	0.0768	0.1238	0.4405	0.3114	0.2855	0.4416		1.3026	0.8565	1.1516		100	100	100		Xenobiotics	Benzoate Metabolism	100000008	65-85-0	1750	121.029
	3610			2,4,6-trihydroxybenzoate	LC/MS neg	35892		HMDB29649	66520			0.43	4.23	9.78		0.0024	0.0049	0.0622	0.1101	0.0367	0.0689	0.0006	0.0098		0.9313	0.4025	3.937		100	50	100		Xenobiotics	Benzoate Metabolism	100001718	83-30-7	1574	169.014
	3653			p-cresol sulfate	LC/MS neg	36103		HMDB11635	4615423			2.66	0.74	0.28		0.1009	0.0754	0.3365	0.2927	0.208	0.2103	0.0356	0.1263		0.8136	2.1609	0.5993		100	83	83		Xenobiotics	Benzoate Metabolism	100001315	3233-57-7	2890	187.007
	3664			3-(3-hydroxyphenyl)propionate sulfate	LC/MS neg	45415			187488			1.21	1.46	1.2		0.605	0.2318	0.6628	0.4248	0.3253	0.2627	0.5757	0.609		0.9514	1.1513	1.3846		83	83	83		Xenobiotics	Benzoate Metabolism	100005391	86321-32-6	1294	245.013
	3667			3-(3-hydroxyphenyl)propionate	LC/MS neg	35635	C11457	HMDB00375	91			0.46	0.91	1.95		0.2052	0.1204	0.0837	0.1305	0.5195	0.3365	0.2514	0.4251		1.2444	0.5775	1.1278		83	67	67		Xenobiotics	Benzoate Metabolism	100001624	621-54-5	1980	165.056
	3668			3-(4-hydroxyphenyl)propionate	LC/MS neg	39587	C01744	HMDB02199	10394			0.97	1.88	1.94		0.1304	0.0886	0.8734	0.4993	0.0941	0.1306	0.0702	0.2009		0.7197	0.6977	1.3501		50	17	83		Xenobiotics	Benzoate Metabolism	100002914	501-97-3	1670	165.056
	3739		Food Component/Plant	erythrose	LC/MS neg	27722	C01796	HMDB02649	94176			0.92	0.8	0.87		0.2356	0.1325	0.5993	0.4027	0.1017	0.1378	0.2462	0.425		1.1016	1.0134	0.8806		100	100	100		Xenobiotics	Food Component/Plant	100001042	583-50-6	780	119.035
	3740			sucralose	LC/MS neg	36649	C12285	HMDB31554	71485			11.97	14.81	1.24		0.0297	0.0318	0.202	0.2181	0.0092	0.0257	0.1186	0.2913		0.2261	2.7053	3.3494		0	50	100		Xenobiotics	Food Component/Plant	100001789	56038-13-2	3140	395.007
	3748			genistein	LC/MS neg	32448	C06563	HMDB03217	5280961			0.24	0.14	0.56		0.0006	0.0019	0.0039	0.0197	0.0002	0.0013	0.1642	0.348		4.4714	1.0932	0.6152		100	100	100		Xenobiotics	Food Component/Plant	100001221	446-72-0	3754	269.046
	3759			diaminopimelate	LC/MS pos early	15130	C00666	HMDB01370	439283			0.85	2.41	2.84		0.0592	0.0516	0.6672	0.4258	0.0618	0.0987	0.0267	0.1039		0.7252	0.6144	1.7442		33	17	100		Xenobiotics	Food Component/Plant	100000115	1476-39-7;2577-62-0	2569	191.103
	3769			apigenin	LC/MS neg	21189	C01477	HMDB02124	5280443			0.86	0.88	1.02		0.7819	0.2697	0.521	0.3692	0.587	0.3615	0.92	0.7047		1.1655	1.0064	1.0233		100	100	100		Xenobiotics	Food Component/Plant	100000935	520-36-5	3845	269.046
	3786			2,3-dihydroxyisovalerate	LC/MS polar	38276	C04039	HMDB12141	677			1.39	0.65	0.47		0.0511	0.0471	0.2061	0.2199	0.1877	0.1958	0.0164	0.0741		1.1518	1.5964	0.7457		100	100	100		Xenobiotics	Food Component/Plant	100002417	1756-18-9	1050	133.051
	3789			2,8-quinolinediol	LC/MS neg	42975	C06342		97250			0.65	0.41	0.64		0.0293	0.0317	0.1422	0.174	0.0089	0.0253	0.1669	0.348		1.1828	0.7642	0.4882		100	83	17		Xenobiotics	Food Component/Plant	100004206	15450-76-7	3133	160.04
	3793			2-isopropylmalate	LC/MS polar	15667	C02504	HMDB00402	77			0.37	0.33	0.9		0.1812	0.1114	0.2483	0.241	0.0714	0.1093	0.4712	0.5626		2.0941	0.7694	0.6933		83	100	83		Xenobiotics	Food Component/Plant	100000409	3237-44-3	2605	175.061
	3794			2-oxindole-3-acetate	LC/MS pos early	40479		HMDB35514	3080590			3.43	14.6	4.25		0.0004	0.0013	0.1387	0.1719	0.0001	0.001	0.003	0.0257		0.5799	1.9917	8.4661		100	100	100		Xenobiotics	Food Component/Plant	100003109	2971-31-5	2378	192.066
	3801			3,5-dihydroxybenzoic acid	LC/MS neg	37508		HMDB13677	7424			0.3	1.11	3.77		0.0012	0.0029	0.0011	0.0081	0.963	0.4711	0.001	0.0126		1.233	0.364	1.373		100	0	100		Xenobiotics	Food Component/Plant	100002054	99-10-5	785.4	153.019
	3816			gluconate	LC/MS polar	587	C00257	HMDB00625	10690			1.08	1.41	1.31		0.3653	0.1718	0.7973	0.4731	0.1873	0.1958	0.2802	0.4387		0.9433	1.0172	1.3291		100	100	100		Xenobiotics	Food Component/Plant	338	527-07-1	2922	195.051
	3873			daidzein	LC/MS neg	32453	C10208	HMDB03312	5281708			0.18	0.09	0.48		0.0001	0.0006	0.0006	0.0049	5.4416e-05	0.0005	0.2455	0.425		7.8532	1.4288	0.6926		100	100	100		Xenobiotics	Food Component/Plant	100001219	486-66-8	3566	253.051
	3876			genistein sulfate*	LC/MS neg	62061						0.77	3.14	4.09		0.6642	0.2449	0.6107	0.4067	0.3751	0.2847	0.699	0.6423		1.3369	1.0264	4.1952		100	100	100		Xenobiotics	Food Component/Plant	100020207		3616	349.002
	3880			dihydroferulic acid	LC/MS neg	40481			14340			1.01	1.06	1.04		0.96	0.3085	0.9043	0.5077	0.8729	0.4487	0.7795	0.6724		0.9451	0.9545	0.9972		83	83	100		Xenobiotics	Food Component/Plant	100003432	1135-23-5	1928	195.066
	3884			enterolactone	LC/MS neg	39626			10685477			0.38	0.48	1.28		0.6878	0.2511	0.4036	0.3191	0.7811	0.4222	0.5728	0.609		1.5555	0.5892	0.7535		50	33	50		Xenobiotics	Food Component/Plant	100003070	78473-71-9	4515	297.113
	3886			equol	LC/MS neg	36774	C14131	HMDB02209	91469			4.85	10.76	2.22		0.0003	0.0011	0.0151	0.0447	7.3918e-05	0.0006	0.018	0.0788		0.1676	0.8134	1.8033		0	83	100		Xenobiotics	Food Component/Plant	100001725	531-95-3;94105-90-5	4565	241.087
	3888			equol sulfate	LC/MS neg	40478						4.68	10.89	2.32		0.0128	0.0177	0.0401	0.0864	0.0042	0.0146	0.277	0.4354		0.2074	0.9715	2.2583		0	83	100		Xenobiotics	Food Component/Plant	100003429		3630	321.044
	3893			ferulate	LC/MS neg	35630	C01494	HMDB00954	445858			0.45	0.33	0.73		0.0364	0.0374	0.0328	0.0747	0.0191	0.0421	0.7876	0.6769		1.9506	0.8861	0.6485		100	100	100		Xenobiotics	Food Component/Plant	100001542	537-98-4	1755	193.051
	3894			ferulic acid 4-sulfate	LC/MS neg	47114		HMDB29200	6305574			0.85	1.09	1.28		0.8992	0.2953	0.6512	0.4209	0.8437	0.4433	0.7978	0.6775		1.1534	0.9792	1.2551		100	50	67		Xenobiotics	Food Component/Plant	100005389	86321-29-1	1200	273.007
	3908			glycitein	LC/MS pos late	34024	C14536	HMDB05781	5317750			0.38	0.52	1.35		0.1122	0.0806	0.0718	0.1203	0.0681	0.1062	0.9775	0.7179		2.3932	0.9186	1.2432		100	100	83		Xenobiotics	Food Component/Plant	100001222	40957-83-3	700	285.076
	3919			indolin-2-one	LC/MS pos early	43374	C12312		321710			1.92	2.2	1.14		0.4285	0.1893	0.2029	0.2183	0.4404	0.3114	0.5978	0.6202		0.3776	0.7266	0.8316		17	50	33		Xenobiotics	Food Component/Plant	100004318	59-48-3	2575	134.06
	3923			isopimaric acid	LC/MS neg	31557	C09118	HMDB36811	442048			0.71	1.27	1.78		0.3732	0.1749	0.2693	0.2504	0.8469	0.4433	0.1991	0.3824		1.3899	0.9877	1.763		100	100	100		Xenobiotics	Food Component/Plant	100001120	5835-26-7	5517	301.217
	3947			naringenin	LC/MS neg	44663	C00509	HMDB02670	932			1.35	1.42	1.05		0.5549	0.2195	0.595	0.4009	0.2857	0.2479	0.5812	0.6127		0.8665	1.1694	1.2331		83	67	83		Xenobiotics	Food Component/Plant	100000920	67604-48-2	3437	271.061
	3950			N-glycolylneuraminate	LC/MS pos early	37123	C03410	HMDB00833	123802			0.71	1.1	1.55		0.0103	0.0149	0.0197	0.0529	0.447	0.3142	0.004	0.0312		1.007	0.7109	1.1051		100	100	100		Xenobiotics	Food Component/Plant	100001491	1113-83-3	636	326.108
	3952			nicotianamine	LC/MS pos early	43026	C05324		9882882			0.11	0.87	7.76		5.2684e-06	6.2369e-05	3.7149e-06	0.0002	0.4836	0.3242	1.2656e-05	0.0007		1.2111	0.1362	1.0572		100	50	100		Xenobiotics	Food Component/Plant	100004035	34441-14-0	1800	304.15
	3961			pheophorbide A	LC/MS pos late	35879	C18021		5323510			1.27	1.36	1.07		0.5025	0.2078	0.371	0.3078	0.2775	0.2435	0.8405	0.6889		0.814	1.0354	1.1061		100	100	100		Xenobiotics	Food Component/Plant	100001689	15664-29-6	1562	593.276
	3962			pheophytin A	LC/MS pos late	61857	C05797					0.65	0.66	1.02		0.0976	0.0739	0.0451	0.0926	0.091	0.1284	0.7096	0.6437		1.4508	0.9392	0.9581		100	100	100		Xenobiotics	Food Component/Plant	100001827	603-17-8	3176	871.573
	3981			quinate	LC/MS polar	18335	C00296	HMDB03072	6508			1.12	0.94	0.84		0.9345	0.3029	0.856	0.4916	0.8562	0.4452	0.7174	0.6452		1.2393	1.3878	1.1631		100	100	100		Xenobiotics	Food Component/Plant	100000442	77-95-2	2432.9	191.056
	4006			stachydrine	LC/MS pos early	34384	C10172	HMDB04827	115244			0.12	0.4	3.33		0.0018	0.0041	0.0005	0.0043	0.0385	0.0714	0.0443	0.1452		4.5967	0.5508	1.8357		100	67	100		Xenobiotics	Food Component/Plant	100001296	4136-37-2	1440	144.102
	4025			tyrosol	LC/MS neg	41515	C06044	HMDB04284	10393			1.01	1.61	1.59		0.1614	0.1031	0.9746	0.5305	0.096	0.1322	0.1017	0.2624		0.6837	0.6898	1.0978		17	33	67		Xenobiotics	Food Component/Plant	100003493	501-94-0	2716	137.061
	4060			daidzein sulfate (2)	LC/MS neg	48728						0.71	2.74	3.87		0.7043	0.2551	0.6727	0.4273	0.6831	0.3934	0.4102	0.5253		0.9751	0.6889	2.6677		50	33	17		Xenobiotics	Food Component/Plant	100006363		3330	333.008
	4065			daidzein sulfate (1)	LC/MS neg	48727						0.76	2.15	2.82		0.6571	0.2431	0.6122	0.4068	0.6879	0.3937	0.3684	0.4938		1.1016	0.8398	2.3664		67	33	17		Xenobiotics	Food Component/Plant	100006362		2843	333.007
	4500		Drug - Topical Agents	salicylate	LC/MS polar	1515	C00805	HMDB01895	338			0.64	0.69	1.08		0.4096	0.185	0.2275	0.2337	0.2832	0.2463	0.8863	0.6973		1.318	0.8401	0.911		100	100	83		Xenobiotics	Drug - Topical Agents	501	69-72-7	802	137.024
	4568		Chemical	sulfate*	LC/MS neg	46960	C00059	HMDB01448	1118			0.91	1.23	1.35		0.196	0.1167	0.5868	0.3971	0.2122	0.211	0.0828	0.2271		1.0404	0.9456	1.2758		100	100	100		Xenobiotics	Chemical	100002528	14808-79-8	616	96.9601
	4571			O-sulfo-L-tyrosine	LC/MS neg	45413			514186			0.19	0.18	0.93		3.9718e-06	5.2551e-05	7.8191e-06	0.0002	3.303e-06	7.18e-05	0.6161	0.6218		4.511	0.8623	0.8029		100	100	100		Xenobiotics	Chemical	100005384		990	260.023
	4625			bicine	LC/MS pos early	20708		HMDB11727	8761			0.31	0.33	1.07		0.0711	0.059	0.0411	0.0878	0.0508	0.086	0.9132	0.7026		2.6869	0.8228	0.8837		100	100	100		Xenobiotics	Chemical	100000854	150-25-4	975	164.092
	4643			HEPES	LC/MS neg	21248			23831			0.67	5.22	7.75		0.1732	0.1087	0.4017	0.3189	0.0661	0.1036	0.2808	0.4387		1.2326	0.829	6.4285		50	100	100		Xenobiotics	Chemical	100000843	7365-45-9	1022	237.091
	4673			succinimide	LC/MS polar	41888	C07273		11439			0.31	0.56	1.8		0.0001	0.0005	2.8551e-05	0.0006	0.0068	0.0203	0.0142	0.0685		2.1104	0.661	1.1885		100	100	100		Xenobiotics	Chemical	100003696	123-56-8	2155	116.035
	4677			trizma acetate	LC/MS pos early	20710	C07182		6503			0.81	4.57	5.65		0.1995	0.1181	0.4987	0.3595	0.0803	0.1188	0.2556	0.4251		2.0862	1.6876	9.5383		100	100	100		Xenobiotics	Chemical	100000856	6850-28-8	1884	122.081
	4705			thioproline	LC/MS pos early	53231			93176			2.72	2.14	0.79		0.092	0.0718	0.0324	0.0747	0.1847	0.1938	0.3487	0.4881		0.4777	1.3007	1.0211		83	100	50		Xenobiotics	Chemical	100009232	34592-47-4	1250	134.027
